1 **A chemical counterpunch: *Chromobacterium violaceum* ATCC31532 produces**  
2 **violacein in response to translation-inhibiting antibiotics**

3

4 Gabriel L. Lozano<sup>1,2</sup>, Changhui Guan<sup>2</sup>, Yanzhuan Cao<sup>2</sup>, Bradley R. Borlee<sup>3</sup>, Nichole A.  
5 Broderick<sup>4</sup>, Eric V. Stabb<sup>5</sup>, Jo Handelsman<sup>1,2</sup>

6

7 <sup>1</sup> Wisconsin Institute for Discovery and Department of Plant Pathology, University of  
8 Wisconsin-Madison

9 <sup>2</sup> Department of Molecular, Cellular and Developmental Biology, Yale University

10 <sup>3</sup> Department of Microbiology, Immunology and Pathology, Colorado State University

11 <sup>4</sup> Department of Molecular and Cell Biology, University of Connecticut

12 <sup>5</sup> Department of Microbiology, University of Georgia

13

14 \*To whom correspondence should be addressed [jo.handelsman@wisc.edu](mailto:jo.handelsman@wisc.edu)

15

16

17 **ABSTRACT**

18 Bacterially produced antibiotics play important roles in microbial interactions and  
19 competition. Antibiosis can induce resistance mechanisms in target organisms and may  
20 induce other countermeasures as well. Here, we show that hygromycin A from  
21 *Streptomyces* sp. 2AW induces *Chromobacterium violaceum* ATCC31532 to produce the  
22 purple antibiotic violacein. Sublethal doses of other antibiotics that similarly target the  
23 polypeptide elongation step of translation likewise induced violacein production, unlike  
24 antibiotics with different targets. *C. violaceum* biofilm formation and virulence against  
25 *Drosophila melanogaster* were also induced by translation-inhibiting antibiotics, and we  
26 identified an antibiotic-induced response (*air*) two-component regulatory system that is  
27 required for these responses. Genetic analyses indicated a connection between the Air  
28 system, quorum-dependent signaling, and the negative regulator VioS, leading us to  
29 propose a model for induction of violacein production. This work suggests a novel  
30 mechanism of interspecies interaction in which a bacterium produces an antibiotic in  
31 response to inhibition by another bacterium.

32

33 **KEYWORDS**

34 Sub-lethal concentration antibiotics, two-component regulatory system, *Streptomyces*,  
35 microbe-microbe interactions, translation inhibition.

36

## 37 INTRODUCTION

38 In many microbial communities, diverse species contribute to complex functions  
39 that they cannot perform in isolation (Newman & Banfield, 2002). Community members  
40 also compete with each other (Ghoul & Mitri, 2016), in part through production of  
41 antibiotics—secondary metabolites that inhibit other community members. The ability for  
42 microorganisms to detect and respond to antibiotics is likely to be important for survival  
43 and competitiveness in complex communities.

44 Actinobacteria are prolific producers of secondary metabolites that affect  
45 development and secondary metabolism in target bacteria (Abrudan et al., 2015; Traxler  
46 & Kolter, 2015). Different classes of secreted secondary metabolites, such as  
47 siderophores, biosurfactants, and antibiotics modulate bacterial interactions. In several  
48 pathogenic bacteria, sublethal concentrations of antibiotics induce a global transcriptional  
49 response, which might be a stress response but might also indicate that antibiotics act as  
50 signal molecules (Fajardo & Martínez, 2008; Goh et al., 2002). A current challenge is to  
51 understand how bacteria transduce antibiotic exposure to a targeted transcriptional  
52 response. Evidence suggests that antibiotics typically elicit physiological responses  
53 through their inhibitory activity rather than by other means such as structural recognition  
54 (Boehm et al., 2009; Dörr et al., 2016). Cellular damage generated by bactericidal  
55 antibiotics can induce transcription of stress-response genes, but it is less clear how  
56 bacteriostatic antibiotics elicit transcriptional changes. The concept of “competition  
57 sensing” suggests that some microbes may have evolved the ability to detect a hazard  
58 signal using established stress responses and respond by up-regulating production of  
59 toxins and antibiotics (Cornforth & Foster, 2013).

60 *Chromobacterium* species are Gram-negative  $\beta$ -proteobacteria well known for  
61 production of violacein, a purple pigment with antimicrobial and anti-parasitic activities  
62 (Durán et al., 2011; Gillis & Logan, 2005). We discovered an inter-species interaction  
63 that triggers violacein production, in which *Streptomyces* sp. 2AW (Stulberg et al., 2016)  
64 induces the production of violacein in *Chromobacterium violaceum* ATCC31532. The  
65 work presented here demonstrates that production of violacein in *C. violaceum*  
66 ATCC31532 is regulated by ribosomal perturbation generated by bacteriostatic  
67 translation-inhibiting antibiotics and modulated by a previously unknown two-component  
68 regulatory system.

69

## 70 RESULTS

71 **Hygromycin A stimulates production of violacein.** We found that *Streptomyces*  
72 sp. 2AW induces the production of violacein by *C. violaceum* ATCC31532 when the  
73 bacteria are grown in close proximity (Figure 1A). Contact is not necessary, suggesting  
74 that a diffusible molecule produced by *Streptomyces* sp. 2AW is responsible for  
75 triggering the response. Partially purified hygromycin A from *Streptomyces* sp. 2AW at  
76 sublethal levels induces violacein production, as does another hygromycin A producing  
77 bacterium, *Streptomyces hygroscopicus* NRRL 2388 (Figure 1B-C). Mutations that  
78 attenuate or block hygromycin A production ( $\Delta$ *hyg17* or  $\Delta$ *hyg8*, respectively  
79 (Palaniappan et al., 2009)) eliminated violacein induction by *S. hygroscopicus* (Figure  
80 1C). Taken together these results indicate that hygromycin A is likely responsible for the  
81 ability of *Streptomyces* sp. 2AW to induce violacein production in *C. violaceum*  
82 ATCC31532.

83           **Violacein production is induced by inhibitors of polypeptide elongation.** We  
84 considered the alternative possibilities that violacein induction could be a response to: (i)  
85 the hygromycin A molecule specifically, (ii) hygromycin A's inhibition of translation, or  
86 (iii) sublethal antibiosis more generally. To distinguish among these three alternatives,  
87 we evaluated diverse classes of antibiotics, including those that block various steps in  
88 translation and others that have different cellular targets (Figure supplement 1). Of the  
89 twenty antibiotics tested, seven induced violacein production in *C. violaceum*  
90 ATCC31532, including blasticidin S, spectinomycin, hygromycin B, apramycin,  
91 tetracycline, erythromycin, and chloramphenicol (Figure 2A, Figure supplement 1).  
92 These antibiotics share two characteristics with hygromycin A: they inhibit growth of *C.*  
93 *violaceum* ATCC31532, and they block polypeptide elongation during translation,  
94 although they belong to different chemical families and inhibit translation by binding to  
95 different sites in the ribosomal region responsible for polypeptide elongation. Other  
96 antibiotics, including several that block different steps in translation (e.g., kasugamycin,  
97 puromycin, and kanamycin), did not induce violacein (Figure supplement 1).

98           To explore whether induction of violacein production is a response to the  
99 inhibition of polypeptide elongation, we subjected *C. violaceum* ATCC31532 to cold  
100 shock. Sudden decreases in temperature can inhibit polypeptide elongation by generating  
101 secondary structures in mRNA (Horn, Hofweber, Kremer, & Kalbitzer, 2007), and  
102 previous studies indicated parallels in responses between translation-inhibiting antibiotics  
103 and cold-shock (VanBogelen & Neidhardt, 1990). We found that rapid transfer of  
104 exponential phase broth cultures from 28°C to 16°C induced violacein production in *C.*  
105 *violaceum* ATCC31532 (Figure 2A).

106           **The Air two-component regulatory system is required for the response to**  
107 **translation inhibition.** To identify elements that participate in transducing the stimulus  
108 of translation inhibition into the response of induced violacein production, we screened  
109 random transposon mutants for loss of this ability. Because hygromycin A is not  
110 commercially available, we screened responses to sublethal concentrations of  
111 tetracycline, another strong inducer of violacein production (Figure 2A). Mutants were  
112 selected for further characterization if the screen revealed at least two independent  
113 mutants with transposon insertions in the same gene. To test the role of these genes in the  
114 regulatory response to disruption of polypeptide elongation, we further evaluated each  
115 mutant's violacein production when treated with spectinomycin, erythromycin, or cold  
116 shock induction at 16°C. We identified five genes that, when disrupted, decrease  
117 violacein production in response to each of these stimuli (Figure 2B). We also identified  
118 mutants with altered responses to a subset of treatments (Figure supplement 2).

119

120           *Mutants with similar responses to inhibitors of polypeptide elongation.* Strains  
121 with mutations in a three-gene cluster encoding a putative two-component regulatory  
122 system do not respond to the three antibiotics tested or to cold shock (Figure 2B). We  
123 designated this cluster the antibiotic-induced response (*air*) system, composed of genes  
124 that encode proteins predicted to serve as a sensor histidine kinase (AirS), a response  
125 regulator (AirR), and an oxidoreductase molybdopterin-binding domain (OxMoco)  
126 (IPR036374) protein (AirM). The *airS* and *airM* genes appear to be organized in an  
127 operon. In many two-component regulatory systems the sensor and response regulator  
128 genes are co-transcribed. However, in this system *airMS* and *airR* are convergently

129 transcribed (Figure 3A-B). Notably, three other sensor histidine kinase genes in the  
130 genome are similarly arranged near genes encoding an OxMoco domain. Similar systems  
131 are also observed in other *Chromobacterium* and *Burkholderia* spp. (Figure supplement  
132 3). To determine whether *airM* is essential for induction of violacein production, or if the  
133 phenotype of the *airM* transposon mutant reflects a polar effect on *airS*, we deleted the  
134 *airMS* operon and then complemented with *airS* or with *airMS*. Complementation with  
135 *airMS* restored the response to tetracycline whereas supplying *airS* alone did not (Figure  
136 3C), suggesting that *airM* provides an important functional role for the two-component  
137 regulatory system.

138 In addition to the mutants with insertions disrupting the *air* system, we identified  
139 strains containing transposon insertions in a phosphoenolpyruvate synthase gene (*ppsA*;  
140 CLV04\_1656) and a putative long chain fatty-acid CoA ligase gene (*fadD2*;  
141 CLV04\_3834) that likewise display attenuated violacein induction in response to  
142 tetracycline or other conditions that inhibit polypeptide elongation (Figure 2B).

143

144 *Mutants with antibiotic-specific affects.* We also identified several mutants that  
145 failed to induce violacein production but only for a specific subset of antibiotics (Figure  
146 supplement 2A). Upon examination, these mutants, including the recently described *cdeR*  
147 (CLV04\_2412) transcriptional repressor of the *cdeAB-oprM* multidrug efflux pump  
148 (Evans et al., 2018), had simply become more resistant to the respective antibiotic, and at  
149 higher doses violacein induction was still evident (Figure supplement 4).

150 In addition, strains with mutations in a transcriptional regulator of the GntR  
151 family (CLV04\_3464) and in an ABC transporter (CLV04\_3178), showed a more

152 pronounced induction of violacein in response to the presence of tetracycline,  
153 erythromycin, or spectinomycin. Strains with mutations in a putative enoyl-CoA  
154 hydratase (*fadB2*; CLV04\_1011) likewise showed greater induction of violacein in the  
155 presence of the three antibiotics and to the cold shock induction at 16°C, but these  
156 mutants also had a higher basal level of violacein production even in the absence of these  
157 stimuli (Figure supplement 2B).

158

159 **Additional responses to sub-lethal concentrations of antibiotics.** Sublethal  
160 concentrations of tetracycline induced other phenotypes besides violacein production in  
161 *C. violaceum* ATCC31532. For example, *C. violaceum* ATCC31532 produced biofilms  
162 on glass in response to sublethal tetracycline concentrations in an *air*-dependent manner  
163 (Figure supplement 5). We also tested *C. violaceum* ATCC31532 in an oral infection  
164 assay with *Drosophila melanogaster*, which was of interest because of the strain's close  
165 phylogenetic association with *C. subtsugae*, an insect pathogen (Figure supplement 6). *C.*  
166 *violaceum* ATCC31532 killed *D. melanogaster* in the presence of tetracycline, but not in  
167 its absence, and this tetracycline-induced virulence required the *air* system (Figure 4).

168 Violacein expression is under control of the CviI/CviR quorum sensing system,  
169 and it is negatively regulated by *vioS*, an otherwise uncharacterized regulator (Devescovi  
170 et al., 2017; Swem et al., 2009). We tested biofilm formation and insecticidal activity in a  
171 *vioS* mutant, which produces violacein constitutively, and in a *vioS cviI* double mutant,  
172 which does not produce violacein. Both biofilm production and insecticidal activity are  
173 expressed in the *vioS* mutant and not in the *vioS cviI* double mutant, indicating that they



174 are regulated by the CviI/CviR quorum sensing system and repressed by VioS (Figure 4,  
175 Figure supplement 5).

176

177 **Transcriptional changes in response to sublethal concentrations of**  
178 **antibiotics.** To understand better the physiological response to sub-lethal concentrations  
179 of antibiotics and the role of the *air* system in it, we used global RNA sequencing  
180 analysis. *C. violaceum* ATCC31532 wild type and *airR* mutant were grown both with no  
181 antibiotics and challenged separately with tetracycline and spectinomycin, and RNA  
182 pools were subjected to RNA-sequencing analysis. Each antibiotic induced a distinct but  
183 overlapping transcriptional response in the wild type (Figure supplement 7A). Using  
184 Clusters of Orthologous Groups (COG) categories, we analyzed the 640 genes that  
185 responded similarly to both antibiotics (Table supplement 1). Motility genes were  
186 enriched among genes that were down-regulated in response to tetracycline and  
187 spectinomycin (Figure supplement 7B). Genes that involved in translation, ribosomal  
188 structure and biogenesis, and secondary metabolite biosynthesis, transport, and  
189 catabolism were enriched among those up-regulated in response to both antibiotics  
190 (Figure supplement 7B).

191 A comparison of the WT transcriptional response with the *airR* mutant response  
192 identified 83 genes that were differentially regulated, suggesting they were directly or  
193 indirectly modulated by the *air* system. These transcripts included the violacein gene  
194 cluster and two other gene clusters encoding secondary metabolite biosynthetic pathways  
195 (Table supplement 1). Other differentially expressed genes fell in several functional  
196 categories with no distinct pattern.

197           Some genes that were described above as being identified in the transposon-  
198 mutant screen for altered violacein-induction responses were also found to be regulated in  
199 response to tetracycline and spectinomycin. For example, disruption of a gene that  
200 encodes a MarR family transcriptional regulator (CLV04\_1869) resulted in loss of  
201 violacein induction specifically in response to tetracycline (Figure supplement 2), and  
202 this gene was upregulated in response to both spectinomycin and tetracycline (Table  
203 supplement 2). In contrast, disruption of *fadB2*, with a predicted function of an enoyl-  
204 CoA hydratase, resulted in a stronger up-regulation of violacein production but also  
205 higher background expression (Figure supplement 2), and this gene was down-regulated  
206 in response to both spectinomycin and tetracycline (Table supplement 2).

207

208           **Mechanisms of violacein induction in response to inhibitors of polypeptide**  
209 **elongation.** Two known regulators of violacein production, *vioS* and *cviR*, were  
210 differentially expressed in the presence of either tetracycline or spectinomycin (Table  
211 supplement 1). VioS represses violacein production (Devescovi et al., 2017; McClean et  
212 al., 1997; Swem et al., 2009), and CviR is the pheromone-sensing transcriptional  
213 activator of a quorum-dependent regulatory system that activates violacein production  
214 (Stauff & Bassler, 2011; Swem et al., 2009). The RNA-seq results for these genes of  
215 interest were corroborated and expanded using targeted q-RT-PCR (Figure 5A).  
216 Transcription of *vioS* is down-regulated by sub-lethal levels of tetracycline in the wild  
217 type and in the *airR* mutant, whereas *cviR* is up-regulated in the presence of tetracycline  
218 but only in wild-type and not in the *airR* mutant (Figure 5A). The apparent requirement  
219 of *airR* for *cviR* induction was confirmed by complementing the *airR* mutant with *airR* in

220 *trans* (Figure 5A). Thus, *airR* is required for the induction of *cviR* expression in response  
221 to tetracycline.

222 Devescovi et al. recently showed that VioS is sufficient to inhibit expression of  
223 the transcriptional promoter upstream of the violacein biosynthetic gene cluster, and  
224 counteracts activation of this promoter by CviR/N-hexanoyl-L-homoserine lactone (C6-  
225 HSL) in *E. coli* (Devescovi et al., 2017). Although the mechanism of *vioS*-mediated  
226 inhibition of the *vioA* promoter is not known, the data suggest that VioS and CviR-AHL  
227 compete for the *vioA* promoter, or that VioS binds the CviR-AHL complex, thereby  
228 blocking its activity. These observations suggest that conditions favoring CviR levels  
229 over VioS levels would favor violacein production. We therefore hypothesized that the  
230 induction of violacein by sublethal concentration of antibiotics resulted from two  
231 independent mechanisms, decreased *vioS* expression and increased *cviR* expression  
232 mediated by the *air* system (Figure 5B).

233 We drew three predictions from this model (Figure 5B): (A) increasing the levels  
234 of the violacein activator CviR would bypass repression by VioS; (B) constitutive  
235 overexpression of *vioS* would block violacein induction by translation-inhibiting  
236 antibiotics; and (C) the *air* system would mediate the violacein-induction response to  
237 translation-inhibiting antibiotics even in the absence of *vioS*. We validated predictions A  
238 and B, as follows. Overexpression of *cviR* induces violacein with no antibiotics added,  
239 while overexpression of *cviI*, the quorum sensing autoinducer synthase, does not induce  
240 violacein production (Figure 5C). This observation suggests that under these conditions,  
241 the quorum-dependent response is limited by CviR levels but not by the autoinducer

242 levels. Also, constitutive overexpression of *vioS* blocks violacein induction in the  
243 presence of translation-inhibiting antibiotics (Figure 5D-E).

244 To test prediction C, we first generated the *vioS airMS* double mutant.  
245 Unexpectedly, this double mutant produced less violacein than the *vioS* single mutant  
246 without tetracycline (Figure 5F), and without impacting growth fitness (Figure 5G). The  
247 results suggested some activity of the Air system even in the absence of tetracycline.  
248 Consistent with this possibility, comparison between the wild type and *airR* mutant  
249 RNA-seq data in the absence of antibiotics showed that the *air* system affected regulation  
250 of at least 15 genes (Table supplement 3). Thus, the *air* system appears to have some  
251 activity even without a translation-inhibition signal. Importantly, the data in Figure 5F  
252 show that the *air* system modulates violacein production independently of VioS as we  
253 predicted above.

254

## 255 **DISCUSSION**

256 In this study, we examined an inter-bacterial interaction mediated by sublethal  
257 levels of antibiotics. We found that *C. violaceum* ATCC31532 produces violacein in  
258 response to sublethal levels of hygromycin A released from *Streptomyces* sp. 2AW, and  
259 in response to other structurally diverse bacteriostatic antibiotics that inhibit the  
260 elongation step of translation. Genetic analysis in *C. violaceum* ATCC31532 revealed a  
261 newly described two-component regulatory complex, the *air* system, that participates in  
262 the regulation of violacein production as well as virulence and biofilm production, all of  
263 which are regulated by the CviI/CviR quorum sensing system. Transcriptomic analysis of  
264 the wild type and *airR* mutant showed antibiotic-mediated down-regulation of *vioS* and

265 up-regulation of *cviR*, revealing a mechanism in which VioS repression of violacein is  
266 overcome. This new inter-bacterial competition mechanism differs from the previously  
267 identified competition strategy of acyl-homoserine lactone-dependent eavesdropping  
268 (Chandler, Heilmann, Mittler, & Greenberg, 2012), and suggest that *C. violaceum*  
269 ATCC31532 can sense and respond to other members of the microbial community in part  
270 by using transcriptional regulators that detect inhibitory effects of secondary metabolites  
271 produced by their neighbors.

272         The idea that antibiotics serve as signals in microbial communities (Fajardo &  
273 Martínez, 2008) is supported by our findings that sublethal levels of hygromycin A  
274 produced by *Streptomyces sp.* 2AW induce violacein production by *C. violaceum*  
275 ATCC31532 when the bacteria grow in close proximity. Further experiments are required  
276 to determine whether hygromycin A plays a signaling role in natural communities. As  
277 observed in human pathogenic bacteria, sub-lethal concentrations of antibiotics in *C.*  
278 *violaceum* ATCC31532 also influence social behavior such as pathogenesis, biofilm  
279 formation, quorum sensing, and secondary metabolite production (Andersson & Hughes,  
280 2014). In those systems, it appears that antibiotics function as signals through cellular  
281 damage caused by the inducing antibiotic and detected by general stress response  
282 networks (Cornforth & Foster, 2013). *C. violaceum* ATCC31532 produces violacein only  
283 in response to inhibitors of the polypeptide elongation step of translation. Recently, Liu et  
284 al. reported a similar phenomenon in which translation-inhibitors induce sliding motility  
285 in *Bacillus subtilis* (Y. Liu, Kyle, & Straight, 2018). *C. violaceum* ATCC31532 also  
286 produces violacein in response to cold shock, providing another example of the long-  
287 known parallel between responses to translation-inhibiting antibiotics and cold-shock

288 (VanBogelen & Neidhardt, 1990). These findings suggest that the activity of the  
289 antibiotics, in this case inhibition of the polypeptide elongation step of translation, creates  
290 a cellular stress that initiates a signaling cascade.

291 The *air* system consists of a two-component regulatory system, a sensor (AirS)  
292 and a response regulator (AirR), and an oxidoreductase molybdopterin-binding protein  
293 (AirM), an unexpected element based on prototypical two-component regulators. In a  
294 broad database analysis, we found *airM*-like genes associated with two-component  
295 regulatory systems mainly in  $\beta$ -proteobacteria, but the *air* system is the first identified  
296 with an associated function. The *air* system is puzzling because a predicted membrane  
297 sensor, AirS, detects a cytoplasmic perturbation of ribosome activity. We hypothesize  
298 that the perturbation of actively translating ribosomes would create several cellular  
299 changes detected by the *air* system. We cannot infer the nature of the signal detected by  
300 AirS, since there is no annotation of known sensor domains in the AirS sequence. The  
301 predicted function of AirM, an oxidoreductase protein, suggests that the signal might  
302 involve oxidative change. This is compatible with the observed up-regulation of the  
303 NADH ubiquinone oxidoreductase complex, although expression of oxidative stress  
304 pathways did not appear to change (data not shown).

305 Another potential signal could be alteration in the lipid composition of the  
306 membrane. Our genetic screen identified two genes, a long chain fatty-acid CoA ligase  
307 (*fadB2*) and an enoyl-CoA hydratase (*fadD2*), that are homologs of genes that participate  
308 in fatty acid catabolism (Fujita, Matsuoka, & Hirooka, 2007). Enoyl-CoA hydratase is  
309 down-regulated by sublethal concentrations of tetracycline and spectinomycin, and the  
310 loss-of-function mutant produces violacein without exposure to antibiotics. The long

311 chain fatty-acid CoA might scavenge phospholipids associated with the membrane, and  
312 the down-regulation of the enoyl-CoA hydratase mediated by antibiotics could change  
313 the pool of saturated and unsaturated acyls-CoA, thereby altering the composition of the  
314 new phospholipids added to the membrane.

315 The *air* system is needed for maximum violacein production without sublethal  
316 concentration of tetracycline in a mutant lacking the negative regulator *vioS*, indicating  
317 that the system is active without antibiotic stress and may have a housekeeping function.  
318 This is supported by the differential gene expression of several genes mediated by the *air*  
319 system without antibiotics. In addition, the presence of a third element in this two-  
320 component system may indicate that the *air* system integrates multiple signals of  
321 different cellular pathways, as has been shown in other two-component regulatory  
322 systems with auxiliary elements (Buelow & Raivio, 2010). We hypothesized that *C.*  
323 *violaceum* ATCC31532 co-opts a preexisting signaling network to integrate a response  
324 generated by the ribosome perturbation. This could expand the model of “competition  
325 sensing”, whereby bacteria adapt not only to general stress response networks, but also  
326 transcriptional modulators, such as two-component regulatory systems that respond to  
327 any physiological response generated by antibiotics. The ribosome is one of the most  
328 common targets for antibiotics (Wilson, 2014), and being able to sense inhibition of its  
329 function rather than detecting each antibiotic independently might enable *C. violaceum*  
330 ATCC31532 to have a single response to many competitors rather than separate  
331 responses to individual species.

332 Our discovery of *C. violaceum*'s antibiotic production in response to antibiosis  
333 was facilitated by the fact that this “chemical counterpunch” (i.e., violacein) is purple.

334 With this fortuity in mind, a central question arising from the current study is whether  
335 similar phenomena are widespread but less visible. It seems likely that microbial  
336 communities possess less obvious but equally important emergent forms of chemical  
337 competition. New approaches and technologies (Chodkowski & Shade, 2017; Harn,  
338 Powers, Shank, & Jojic, 2015) have poised the field for a more comprehensive approach  
339 to discovering chemically mediated responses underpin microbial interactions.

340

#### 341 **ACKNOWLEDGMENTS**

342 We gratefully acknowledge Bailey Kleven for her technical assistance, and Dr.  
343 Sara Knaack for discussing transcriptomic analysis. This research was supported by  
344 the Office of the Provost at Yale University, and by funding from the Wisconsin Alumni  
345 Research Foundation through the University of Wisconsin–Madison Office of the Vice  
346 Chancellor for Research and Graduate Education. EVS was supported by grant MCB-  
347 1716232 from the National Science Foundation.

348

#### 349 **COMPETING INTEREST**

350 We declare that we have no significant competing financial, professional, or  
351 personal interests that might have influenced the performance or presentation of the work  
352 described in this manuscript.

353

354

355

356



357 **MATERIALS AND METHODS**

358

359 **Bacterial strains and culture conditions.** *Streptomyces sp.* 2AW (Schloss et al.,  
360 2010), *Streptomyces hygroscopicus* NRRL2388 (Palaniappan et al., 2009),  
361 *Chromobacterium violaceum* ATCC31532 WT, *C. violaceum* ATCC31532 *vioS*  
362 (Cv017)(McClellan et al., 1997), *C. violaceum* ATCC31532 *vioS cviI* (Cv026)(McClellan et  
363 al., 1997) and *C. violaceum* ATCC12472 were cultured in LB (10 g L<sup>-1</sup> tryptone; 5 g L<sup>-1</sup>  
364 yeast extract; 10 g L<sup>-1</sup> NaCl). *S. hygroscopicus* NRRL 2388 and the corresponding  
365 mutants were a gift from Kevin Reynolds at Portland State University. Antibiotics were  
366 obtained from Sigma (St. Louis, MO, USA) (ceftazidime, chloramphenicol,  
367 erythromycin, fusidic acid, hygromycin B, nalidixic acid, paromomycin, piperacillin,  
368 polymyxin B, puromycin, tetracycline, trimethoprim, vancomycin); from RPI (Mt  
369 Prospect IL, USA) (apramycin, blasticidin S, rifampicin, spectinomycin); from American  
370 Bio (Natick, MA, USA) (kanamycin); from MP Biomedicals (Santa Ana, CA, USA)  
371 (streptomycin); and from Enzo Life Sciences (Farmingdale, NY, USA) (kasugamycin).

372

373 **Inter-species interaction assay.** *Streptomyces sp.* 2AW and *S. hygroscopicus*  
374 NRRL2388 were spotted on LB plates and incubated for 3-5 d when 5-10 µL of *C.*  
375 *violaceum* ATCC31532 liquid culture grown for 16 h at 28°C were spotted on two  
376 different positions on the plates. Plates were incubated at 28°C until violacein production  
377 in *C. violaceum* ATCC31232 was observed.

378

379 **Violacein induction assay.** Fractions of a methanol extract from *Streptomyces sp.*  
380 2AW grown on solid media (Stulberg et al., 2016) were directly tested against *C.*  
381 *violaceum* ATCC31532. Each fraction was spotted on LB plates, and then 100  $\mu\text{L}$  of *C.*  
382 *violaceum* ATCC31532 liquid cultures grown to an  $\text{OD}_{600} \sim 4.0$  at  $28^\circ\text{C}$  were spread  
383 over the plates. Plates were incubated for two days at  $28^\circ\text{C}$ . The following antibiotics  
384 were evaluated by directly spotting 10  $\mu\text{L}$  of stock solution on LB plates: apramycin (100  
385  $\mu\text{g mL}^{-1}$ ), blasticidin S (25  $\mu\text{g mL}^{-1}$ ), ceftazidime (20  $\mu\text{g mL}^{-1}$ ), chloramphenicol (34  $\mu\text{g}$   
386  $\text{mL}^{-1}$ ), erythromycin (50  $\mu\text{g mL}^{-1}$ ), fusidic acid (10  $\mu\text{g mL}^{-1}$ ), hygromycin B (50  $\mu\text{g mL}^{-1}$ ,  
387  $\text{mL}^{-1}$ ), kanamycin (50  $\mu\text{g mL}^{-1}$ ), kasugamycin (10  $\mu\text{g mL}^{-1}$ ), nalidixic acid (10  $\mu\text{g mL}^{-1}$ ),  
388 paromomycin (10  $\mu\text{g mL}^{-1}$ ), piperacillin (50  $\mu\text{g mL}^{-1}$ ), polymyxin B (50  $\mu\text{g mL}^{-1}$ ),  
389 puromycin (25  $\mu\text{g mL}^{-1}$ ), rifampicin (20  $\mu\text{g mL}^{-1}$ ), spectinomycin (50  $\mu\text{g mL}^{-1}$ ),  
390 streptomycin (100  $\mu\text{g mL}^{-1}$ ), tetracycline (10  $\mu\text{g mL}^{-1}$ ), trimethoprim (5  $\mu\text{g mL}^{-1}$ ), and  
391 vancomycin (10  $\mu\text{g mL}^{-1}$ ).

392

393 ***C. violaceum* ATCC31532 transposon mutagenesis and genetic screen for**  
394 **mutants defective in violacein production.** pSAM\_BT21 was generated from  
395 pSAM\_BT20 (Sivakumar et al., 2019) by interchanging the ampicillin-resistance gene  
396 with a kanamycin resistance cassette amplified from pENTR/D-TOPO using primers  
397 KanTopo\_MluIFor/KanTopo\_MluIRev (Table supplement 4), and inserted in the MluI  
398 site. *C. violaceum* ATCC31532 and *E. coli* S17-1 $\lambda$ pir with pSAM\_BT21 with kanamycin  
399 (50  $\mu\text{g mL}^{-1}$ ) were first grown individually for 16 h at  $28^\circ\text{C}$  and  $37^\circ\text{C}$ , respectively, with

400 agitation. Cells were washed and resuspended in fresh medium to an OD<sub>600</sub> of 2.0. One  
401 volume of *E. coli* S17-1 $\lambda$ pir with pSAM\_BT21 was mixed with two volumes of *C.*  
402 *violaceum* ATCC31532. Cells were harvested (6,000  $\times$  g, 6 min), resuspended in 100  $\mu$ L  
403 of fresh medium, and spotted on LB plates. The conjugation mixture was incubated at  
404 28°C for 6 h, then scraped and resuspended in 2.5 mL of LB. 100  $\mu$ L aliquots were plated  
405 on LB containing gentamicin (50  $\mu$ g mL<sup>-1</sup>), ampicillin (200  $\mu$ g mL<sup>-1</sup>) and tetracycline  
406 (0.125  $\mu$ g mL<sup>-1</sup>) for selection of *C. violaceum* ATCC31532 transconjugants defective in  
407 violacein production. Plates were incubated for two days at 28°C.

408 For each mutant, 1 mL of liquid culture grown for 16 h was harvested (6,000  $\times$  g,  
409 6 min), and cells were resuspended in 400  $\mu$ L of TE (10  $\mu$ M Tris HCl pH 7.4; 1  $\mu$ M  
410 EDTA pH 8.0). Samples were boiled for 6 min, centrifuged (6,000  $\times$  g, 6 min), and 2  $\mu$ L  
411 of supernatant was used as a template for DNA amplification. Transposon locations were  
412 determined by arbitrarily primed PCR (Goodman et al., 2009), which consisted of a  
413 nested PCR using first-round primer GenPATseq1 and either AR1A or AR1B and second  
414 round primer GenPATseq2 and AR2 (Table supplement 4). PCR products of the second  
415 round were purified by gel extraction (QIAquick Gel Extraction Kit; QIAGEN) and then  
416 sequenced using primer GenPATseq2. PCR sequencing was performed by the DNA  
417 Analysis Facility on Science Hill at Yale University.

418

#### 419 **Assay for violacein production in response to antibiotics and cold shock.**

420 Violacein production by mutants identified as defective for violacein induction in  
421 response to tetracycline (0.125  $\mu$ g mL<sup>-1</sup>) was evaluated in the presence of spectinomycin

422 (2  $\mu\text{g mL}^{-1}$ ), erythromycin (2  $\mu\text{g mL}^{-1}$ ), and in liquid cultures at 16°C and 28°C. Dose-  
423 dependent response of violacein production to tetracycline (0.25 – 4  $\mu\text{g mL}^{-1}$ ),  
424 spectinomycin (4 – 64  $\mu\text{g mL}^{-1}$ ), and erythromycin (2 – 16  $\mu\text{g mL}^{-1}$ ) was evaluated in  
425 several mutants on LB plates. The response to these antibiotics and cold shock was  
426 evaluated visually based on the purple color of violacein.

427

428 **Chromosomal deletion of the *airMS* operon.** The *airMS* operon was deleted by  
429 allelic exchange and replaced with a chloramphenicol-resistance cassette. The *airMS*  
430 deletion cassette was constructed by a modified version of overlap extension (OE) PCR  
431 (Ho, Hunt, Horton, Pullen, & Pease, 1989). Fragments 1 kb upstream and 1 kb  
432 downstream of the *airMS* operon were amplified using primers MuCv0535/6\_Afor and  
433 MuCv0535/6\_Arev, or MuCv0535/6\_Bfor and MuCv0535/6\_Brev, respectively (Table  
434 supplement 4). The resulting products had overlapping homology and further  
435 amplification with primers MuCv0535/6\_Afor and MuCv0535/6\_Brev resulted in a  
436 single combined product of approximately 2 kb representing a fusion of the upstream and  
437 downstream sequences. This PCR product was cloned into pENTR/D-TOPO, generating  
438 pairMS\_ENTR. Primers MuCv0535/6\_Arev and MuCv0535/6\_Bfor were designed to  
439 introduce a SphI site in the overlapping region to allow introduction of a selectable  
440 resistance gene. A chloramphenicol-resistance cassette was amplified from pACYC184  
441 using primers pACYC184Cm\_For/pACYC184Cm\_Rev, which contain SphI sites in the  
442 5' region, and cloned into pENTR/D-TOPO, generating pCm\_ENTR. The  
443 chloramphenicol cassette was recovered from pCm\_ENTR using SphI, and cloned

444 between the upstream and downstream region of the *airMS* operon. A *mob* element was  
445 recovered from pmob\_ENTR (Lozano et al., 2019) using AscI, and cloned into an AscI  
446 site in the pENTR backbone, generating pairMS\_Cm\_mob\_ENTR. Conjugation mixtures  
447 of *C. violaceum* ATCC31532 and *E. coli* S17-1 $\lambda$ pir carrying the  
448 pairMS\_Cm\_mob\_ENTR vector were prepared following the procedure for generating  
449 transposon mutants. Double recombinant *C. violaceum* ATCC31532 transconjugants  
450 were selected based on their ability to grow on chloramphenicol (34  $\mu\text{g mL}^{-1}$ ) and  
451 screened for the inability to grow on kanamycin (50  $\mu\text{g mL}^{-1}$ ). The *airMS* deletion  
452 mutant was confirmed by PCR using MuCv0535/6\_Afor and MuCv0535/6\_Brev, and by  
453 evaluating violacein production in the presence of tetracycline. The same methodology  
454 was used to delete *airMS* in the *C. violaceum* ATCC31532 *vioS* mutant.

455

456 **Complementation and overexpression assays.** The broad-host-range expression  
457 and arabinose-inducible vector pJN105 was modified by introduction of the  
458 chloramphenicol-resistance cassette recovered from pCm\_ENTR into the SphI site,  
459 generating pJN105Cm. *airS* was amplified using primers CV0536\_For and  
460 CV0536\_Rev. *airMS* was amplified using primers CV0535/6\_For and CV0536\_Rev.  
461 *airR* was amplified using primers CviR\_For and CviR\_Rev. *vioS* was amplified using  
462 primers CV1055\_For and CV1055\_Rev. *cviI* was amplified using primers CviI\_For and  
463 CviI\_Rev, and *cviR* was amplified using primers CviR\_For and CviR\_Rev. For all these  
464 genes, a XbaI site in the 5' region was added to the forward primer, and a SacI site in the  
465 5' region was added to the reverse primer, for a directional integration of each gene in  
466 front of the *araBAD* promoter in pJN105Cm. Plasmids were transferred to the

467 corresponding host using the same conjugation protocol used for generating the  
468 transposon mutants. Genes under control of the *araBAD* promoter were induced with  
469 arabinose (0.05 – 1 mg mL<sup>-1</sup>).

470

471 ***Drosophila melanogaster* oral infection assay.** *Canton-S* (*Cs*) flies (wolbachia  
472 free) were used as standard wild-type lines. *Drosophila* stocks were maintained at 25°C  
473 on cornmeal medium (8 g L<sup>-1</sup> agar; 80 g L<sup>-1</sup> polenta; 40 g L<sup>-1</sup> yeast; 40 g L<sup>-1</sup> sucrose;  
474 53.6 ml L<sup>-1</sup> moldex). *C. violaceum* strains were streaked from frozen glycerol stocks onto  
475 LB plates and incubated at 28°C overnight. Isolated colonies were then inoculated into  
476 LB medium and cultured at 28°C for 20 h. Cultures were centrifuged (4,000 rpm, 20 min,  
477 4°C). The supernatant was decanted, the pellets were resuspended in the remaining  
478 liquid, and the concentration of the cultures were adjusted to OD<sub>600</sub> = 200  
479 (approximately 100X concentration of the original overnight culture). For antibiotic  
480 treatment, tetracycline (2.5 µg mL<sup>-1</sup>) was added to concentrated cultures immediately  
481 before feeding to flies.

482 Adult female flies were starved in empty vials for 2 h at 29°C. Paper filters were  
483 placed on top of food medium and 150 µL of a 1:1 mixture of the concentrated pellet  
484 (OD<sub>600</sub> = 200) and 2.5% sucrose was added; for the sucrose-negative control, LB was  
485 substituted for the bacterial pellet. The starved flies were transferred into the infection  
486 vials and kept at 29°C. Survival was assessed at 2 h post-infection to account for any  
487 infection-independent mortality. The number of dead flies per vial was recorded twice

488 per day for approximately five days after infection. Potential differences in survival  
489 between treatments were analyzed for significance with Kaplan Meier Survival Analysis  
490 using Graphpad Prism software.

491

492 **Phylogenetic analysis.** *Chromobacterium* spp. genomes were recovered from the  
493 NCBI database, June 2017 (Table supplement 5). Phylogenomic reconstruction was  
494 accomplished using the phylogenetic and molecular evolutionary (PhaME) analysis  
495 software (Ahmed, Lo, Li, Davenport, & Chain, 2015). PhaME identified SNPs from the  
496 core genome alignments, and the phylogenetic relationships were inferred by maximum  
497 likelihood using FastTree.

498

499 **RNaseq analysis.** *C. violaceum* ATCC31532 WT and *airR* mutant were grown  
500 without antibiotics, with tetracycline ( $0.125 \mu\text{g mL}^{-1}$ ) or with spectinomycin ( $2 \mu\text{g mL}^{-1}$ )  
501 in 5 mL of LB at  $28^\circ\text{C}$  with agitation in duplicate. RNA samples were prepared from 250  
502  $\mu\text{L}$  of cells grown to an  $\text{OD}_{600} \sim 3.2$ . Cultures were mixed with 750  $\mu\text{L}$  of TRIzol and  
503 incubated at  $65^\circ\text{C}$  for 10 min. Samples were frozen at  $-80^\circ\text{C}$  for 10 min and thawed at  
504 room temperature for 15 min. Chloroform (200  $\mu\text{L}$ ) was added, the samples were shaken  
505 and incubated at room temperature for 3 min and centrifuged ( $12,000 \times g$ , 15 min,  $4^\circ\text{C}$ ).  
506 The aqueous phase was recovered, mixed with 500  $\mu\text{L}$  of isopropanol, incubated at room  
507 temperature for 10 min, and centrifuged ( $12,000 \times g$ , 10 min,  $4^\circ\text{C}$ ). The pellet was  
508 washed with 1 mL of 75% ethanol, and air-dried for 10 minutes, resuspended with 50  $\mu\text{L}$   
509 of RNase-free water, and finally incubated at  $60^\circ\text{C}$  for 15 min. DNA was removed from 5  
510  $\mu\text{g}$  of total RNA using the TURBO DNase kit (Invitrogen, Carlsbad, CA, USA).

511 RNA samples were treated with Ribo-Zero rRNA removal kit (Illumina, San  
512 Diego, CA, USA), cDNA libraries were constructed with an average size between 150 bp  
513 and 200 bp, and they were sequenced in Illumina HiSeq2500 paired-end 2x75 platform.  
514 Library preparation and sequencing were performed by the Yale Center for Genome  
515 Analysis. Low quality sequences were trimmed using Trimmomatic (Bolger, Lohse, &  
516 Usadel, 2014). Mapped reads and estimated gene expression levels were calculated using  
517 RSEM with a transcript list of ORFs recovered from *C. violaceum* ATCC31532 genome  
518 (GenBank assembly accession GCA\_002865685.1) (B. Li & Dewey, 2011). Differential  
519 expression was assessed using limma (Ritchie et al., 2015) using “voom” function to  
520 model the mean-variance relationship from read counts converted to log<sub>2</sub>-counts-per-  
521 million (logCPM). Genes that were not appreciably expressed (transcripts per million  
522 (TPM) < 5) were discarded, as recommended (Ritchie et al., 2015). Genes with an  
523 adjusted P value < 0.01 were identified as being differentially expressed.

524 Genes were identified as having a generalized response to inhibition of  
525 translational elongation if they were differentially expressed in WT in the presence of  
526 tetracycline and in the presence of spectinomycin, relative to no antibiotic (Table  
527 supplement 1). Genes for which the response to translational inhibition is mediated,  
528 directly or indirectly, by the *air* system were identified if they were not differentially  
529 expressed in response to tetracycline or streptomycin in the *airR* mutant background (but  
530 were in WT), or if these genes are differentially expressed when compare WT against  
531 *airR* in the presence of both antibiotics (Table supplement 6).

532



533           **Quantitative RT-PCR.** Quantitative reverse-transcriptase PCR was used to  
534 validate the differential gene expression detected for *vioS* and *cviR* in the RNA-Seq  
535 analysis. Primers used are listed in Table supplement 4. *C. violaceum* ATCC31532 WT  
536 pJN105Cm, *airR* pJN105Cm, and *airR* pJN105Cm\_airR were grown with  
537 chloramphenicol (34  $\mu\text{g mL}^{-1}$ ), and with or without tetracycline (0.125  $\mu\text{g mL}^{-1}$ ) in  
538 triplicate as reported above. Total RNA was recovered and DNAase treated in the same  
539 manner as the RNA recovered for RNA-seq analysis. Two hundred nanograms of DNase-  
540 treated RNA was reverse transcribed into cDNA using SuperScript™ III First-Strand  
541 Synthesis System (Invitrogen). Quantitative PCR was carried out in a 10- $\mu\text{L}$  volume  
542 using PowerUp SYBR Green Master Mix (Applied biosystems) with 1  $\mu\text{L}$  of cDNA and  
543 200 nM PCR primers. These reactions were performed using the CFX96 Real-Time  
544 System (Bio-Rad) using the following cycling parameters: 50°C for 10 min, 95°C for 5  
545 min, followed by 40 cycles of 95°C for 10 sec and 60°C for 30 sec. Reverse  
546 transcriptase-minus (RT-minus) template PCRs were included as negative controls to  
547 confirm the absence of genomic DNA contamination. Tenfold serially diluted DNA  
548 standard curves were included on every plate. Melting curve analysis were done to verify  
549 the specificity of the PCR products. Expression levels under each condition were  
550 normalized to the *dnaG* housekeeping gene, and the Pfaffl method was used to calculate  
551 fold change in gene expression (Pfaffl, 2001). Differences between groups were tested for  
552 statistical significance (Student's t-test) using GraphPadPrism 7 software.

553

554           **Characterization of *C. violaceum* ATCC31532 *vioS airR*.** *C. violaceum*  
555 ATCC31532 *vioS* pJN105Cm, *vioS airMS* pJN105Cm, and *vioS airMS*

556 pJN105Cm\_airMS were grown with chloramphenicol ( $34 \mu\text{g mL}^{-1}$ ) and arabinose ( $0.2$   
557  $\text{mg mL}^{-1}$ ), with agitation for two days at  $28^\circ\text{C}$ . Samples were withdrawn periodically to  
558 evaluate bacterial growth by serial dilution and plating in LB, and to quantify violacein  
559 production. Violacein was quantified by a crude violacein extraction (Z. Liu et al., 2013).  
560 One-mL aliquots of cultures of each strain were centrifuged ( $14,000 \times g$ , 20 min), and  
561 cells were resuspended in 1 mL of ethanol to dissolve violacein. Supernatants were  
562 recovered after centrifugation ( $12,000 \times g$ , 10 min), and transferred to 96-well plates.  
563 Violacein concentration was determined spectrophotometrically at 575 nm in a Synergy  
564 HT plate reader (BioTek).

565

## 566 FIGURES AND TABLES

567

568 **Figure 1.** Violacein production by *C. violaceum* ATCC31532 (Cv31532) is induced by  
569 antibiotics produced by *Streptomyces* spp. (A) *C. violaceum* ATCC31532 growth with  
570 *Streptomyces* sp. 2AW (2AW). (B) HPLC fractions of methanol extract from  
571 *Streptomyces* sp. 2AW culture spotted on solid medium spread with *C. violaceum*  
572 ATCC31532. (C) *C. violaceum* ATCC31532 growth with *S. hygroscopicus* NRRL 2388  
573 (NRRL2388) wild type (WT) and two mutants with reduced ( $\Delta\text{hyg17}$ ) or abolished  
574 ( $\Delta\text{hyg8}$ ) hygromycin A production.

575

576 **Figure 2.** Genes involved in induction of violacein production. (A) Violacein production  
577 in response to several inducers in *C. violaceum* ATCC31532 wild type (WT). (B) *C.*  
578 *violaceum* ATCC31532 mutants affected in violacein production in response to all

579 inducers tested. NA, No Antibiotic. Tet, Tetracycline. Spec, Spectinomycin. Ery,  
580 Erythromycin.

581

582 **Figure 3.** Antibiotic-induced response system. Two-component regulatory system  
583 identified by mutant analysis. (A) Gene organization; (B) Functional domains in  
584 predicted proteins. SP, signal peptide; OxMoco, oxidoreductase molybdopterin-binding  
585 domain superfamily (IPR036374); TM, transmembrane domain; NC, non-cytoplasmic  
586 domain; HisK, signal transduction histidine kinase, dimerization/phosphoacceptor  
587 domain superfamily (IPR036097); HATPase, histidine kinase/HSP90-like ATPase  
588 superfamily (IPR036890); REC, CheY-like phosphoacceptor receiver domain  
589 (IPR001789); BetR, beta-proteobacterial transcriptional regulator (IPR013975). (C)  
590 Production of violacein in wild type (WT) carrying an empty vector and in *airMS* mutant  
591 with empty vector or vector carrying *airS* or *airMS*. \*\*\*\*  $P \leq 0.0001$ ; ns, not significant  
592 ( $P > 0.05$ ).

593

594 **Figure 4.** Insecticidal activity of *C. violaceum* ATCC31532 is enhanced by tetracycline.  
595 Insecticidal activity of *C. violaceum* against *Drosophila melanogaster* with and without a  
596 sublethal concentration of tetracycline. *C. violaceum* ATCC31332 (CvATCC31532) wild  
597 type (WT), *airS*, *vioS* and *vioS cviI* mutants, and *C. violaceum* ATCC12472  
598 (CvATCC12472) wild type (WT) were evaluated. Tet, Tetracycline.

599

600 **Figure 5.** A sublethal concentration of tetracycline bypasses *vioS* repression of violacein  
601 production mediated by differential expression of *vioS* and *cviR*. (A) mRNA levels of

602 *vioS* and *cviR* from *C. violaceum* ATCC31532 wild type (WT) carrying an empty vector,  
603 an *airR* mutant carrying an empty vector, and an *airR* mutant carrying a wild-type copy  
604 of *airR* in the presence and absence of tetracycline. \*\*  $P \leq 0.01$ ; \*\*\*\*  $P \leq 0.0001$ ; \*\*\*\*  $P$   
605  $\leq 0.0001$ ; ns, no significant ( $P > 0.05$ ). (B) Proposed model for violacein induction by  
606 translation inhibitors. (C) Overexpression of *cviI* and *cviR* under arabinose regulation.  
607 (D) Overexpression of *vioS* under arabinose regulation in the presence of a sublethal  
608 concentration of tetracycline. (E) Complementation of *vioS* mutant with *vioS* gene under  
609 regulation by arabinose, with and without tetracycline. (F) Violacein production by *vioS*  
610 and *vioS airMS* mutant. (G) Growth of *vioS* mutant and *vioS airMS* mutant. Symbol  
611 legend applies to both (F) and (G).

612

613 **Figure supplement 1.** Profile of *C. violaceum* ATCC31532 violacein production in  
614 response to structurally diverse antibiotics. Antibiotics are classified by cellular target.

615

616 **Figure supplement 2.** Additional genes involved in induction of violacein production by  
617 several inducers. (A) *C. violaceum* ATCC31532 mutants with a disrupted violacein  
618 production in response to some of the inducers tested. (B) *C. violaceum* ATCC31532  
619 mutants with increased violacein production in response to some of the inducers tested.

620 NA, No Antibiotic. Tet, Tetracycline. Spec, Spectinomycin. Ery, Erythromycin. \*

621 Transposons in promotor.

622

623 **Figure supplement 3.** Other pair genes that encode oxidoreductase molybdopterin-  
624 binding domain (OxMoco)(IPR036374) proteins next to a sensor histidine kinases in  
625 *Chromobacterium* and *Burkholderia* spp genomes.

626

627 **Figure supplement 4.** Dose-dependent violacein production in two antibiotic-resistant  
628 mutants. Survival and violacein production of *C. violaceum* ATCC31532 wild type (WT),  
629 mutant in a SAM-dependent methyltransferase (CLV04\_2730), and mutant in *cdeR*, a  
630 transcriptional repressor of the *cdeAB-oprM* multidrug efflux pump system  
631 (CLV04\_2412) with (A) no antibiotic; (B) Erythromycin ( $\mu\text{g mL}^{-1}$ ); (C) Tetracycline ( $\mu\text{g}$   
632  $\text{mL}^{-1}$ ); (D) Spectinomycin ( $\mu\text{g.mL}^{-1}$ ).

633

634 **Figure supplement 5.** *C. violaceum* ATCC31532 biofilm formation on glass in response  
635 to a sublethal concentration of tetracycline. Biofilm formation by *C. violaceum*  
636 ATCC31532 wild type (WT), *vioA*, *airS*, *airR*, *vioS*, and *vioS cviI* mutants without  
637 antibiotics, or in the presence of tetracycline ( $0.25 \mu\text{g.mL}^{-1}$ ). Violacein mutant, *vioA*, was  
638 used as a control for a biofilm visualization without violacein pigmentation. Arrow  
639 indicates the location of the biofilm.

640

641 **Figure supplement 6.** Phylogenetic relatedness of several *Chromobacterium* spp.  
642 Highlight in red *C. violaceum* ATCC31532.

643

644 **Figure supplement 7.** Transcriptome analysis of *C. violaceum* ATCC31532 in the  
645 presence and absence of a sublethal concentration of translation inhibitors. The analysis

646 indicates change in expression from the baseline condition with no antibiotics. (A) Venn  
647 diagram of gene differentially expressed by *C. violaceum* ATCC31532 wild type (WT) in  
648 streptomycin or tetracycline. (B) COG classification of the differentially genes expressed  
649 in streptomycin and tetracycline.

650

651 **Table supplement 1.** Genes expressed differentially in response to streptomycin and  
652 tetracycline.

653

654 **Table supplement 2.** Differential gene expression values of the genes identified in the  
655 genetic screen.

656

657 **Table supplement 3.** Genes differentially expressed between *C. violaceum* ATCC31532  
658 WT and *airR* mutant in the absence of antibiotics.

659

660 **Table supplement 4.** Primers used in this study.

661

662 **Table supplement 5.** *Chromobacterium* spp. genomes used for phylogenetic  
663 reconstruction.

664

665 **Table supplement 6.** Genes expressed differentially in response to streptomycin and  
666 tetracycline that are modulated by *airR*.

667

668 **REFERENCES**

- 669 Abrudan, M. I., Smakman, F., Grimbergen, A. J., Westhoff, S., Miller, E. L., van Wezel,  
670 G. P., & Rozen, D. E. (2015). Socially mediated induction and suppression of  
671 antibiosis during bacterial coexistence. *Proceedings of the National Academy of*  
672 *Sciences of the United States of America*, *112*(35), 11054–11059.  
673 <http://doi.org/10.1073/pnas.1504076112>
- 674 Ahmed, S. A., Lo, C.-C., Li, P.-E., Davenport, K. W., & Chain, P. S. G. (2015). From  
675 raw reads to trees: Whole genome SNP phylogenetics across the tree of life. *bioRxiv*,  
676 032250. <http://doi.org/10.1101/032250>
- 677 Andersson, D. I., & Hughes, D. (2014). Microbiological effects of sublethal levels of  
678 antibiotics. *Nature Reviews. Microbiology*, *12*(7), 465–478.  
679 <http://doi.org/10.1038/nrmicro3270>
- 680 Boehm, A., Steiner, S., Zaehring, F., Casanova, A., Hamburger, F., Ritz, D., et al.  
681 (2009). Second messenger signalling governs *Escherichia coli* biofilm induction  
682 upon ribosomal stress. *Molecular Microbiology*, *72*(6), 1500–1516.  
683 <http://doi.org/10.1111/j.1365-2958.2009.06739.x>
- 684 Bolger, A. M., Lohse, M., & Usadel, B. (2014). Trimmomatic: a flexible trimmer for  
685 Illumina sequence data. *Bioinformatics*, *30*(15), 2114–2120.  
686 <http://doi.org/10.1093/bioinformatics/btu170>
- 687 Buelow, D. R., & Raivio, T. L. (2010). Three (and more) component regulatory systems -  
688 auxiliary regulators of bacterial histidine kinases. *Molecular Microbiology*, *75*(3),  
689 547–566. <http://doi.org/10.1111/j.1365-2958.2009.06982.x>
- 690 Chandler, J. R., Heilmann, S., Mittler, J. E., & Greenberg, E. P. (2012). Acyl-homoserine  
691 lactone-dependent eavesdropping promotes competition in a laboratory co-culture  
692 model. *The ISME Journal*, *6*(12), 2219–2228. <http://doi.org/10.1038/ismej.2012.69>
- 693 Chodkowski, J. L., & Shade, A. (2017). A synthetic community system for probing  
694 microbial interactions driven by exometabolites. *mSystems*, *2*(6), 375.  
695 <http://doi.org/10.1128/mSystems.00129-17>
- 696 Cornforth, D. M., & Foster, K. R. (2013). Competition sensing: the social side of  
697 bacterial stress responses. *Nature Reviews. Microbiology*, *11*(4), 285–293.  
698 <http://doi.org/10.1038/nrmicro2977>

- 699 Devescovi, G., Kojic, M., Covaceuszach, S., Cámara, M., Williams, P., Bertani, I., et al.  
700 (2017). Negative regulation of violacein biosynthesis in *Chromobacterium*  
701 *violaceum*. *Frontiers in Microbiology*, 8(12), 349.  
702 <http://doi.org/10.3389/fmicb.2017.00349>
- 703 Dörr, T., Alvarez, L., Delgado, F., Davis, B. M., Cava, F., & Waldor, M. K. (2016). A  
704 cell wall damage response mediated by a sensor kinase/response regulator pair  
705 enables beta-lactam tolerance. *Proceedings of the National Academy of Sciences of*  
706 *the United States of America*, 113(2), 404–409.  
707 <http://doi.org/10.1073/pnas.1520333113>
- 708 Durán, M., Ponezi, A. N., Faljoni-Alario, A., Teixeira, M. F. S., Justo, G. Z., & Durán, N.  
709 (2011). Potential applications of violacein: a microbial pigment. *Medicinal Chemistry*  
710 *Research*, 21(7), 1524–1532. <http://doi.org/10.1007/s00044-011-9654-9>
- 711 Evans, K. C., Benomar, S., Camuy-Vélez, L. A., Nasser, E. B., Wang, X.,  
712 Neuenswander, B., & Chandler, J. R. (2018). Quorum-sensing control of antibiotic  
713 resistance stabilizes cooperation in *Chromobacterium violaceum*. *The ISME Journal*,  
714 12(5), 1263–1272. <http://doi.org/10.1038/s41396-018-0047-7>
- 715 Fajardo, A., & Martínez, J. L. (2008). Antibiotics as signals that trigger specific bacterial  
716 responses. *Current Opinion in Microbiology*, 11(2), 161–167.  
717 <http://doi.org/10.1016/j.mib.2008.02.006>
- 718 Fujita, Y., Matsuoka, H., & Hirooka, K. (2007). Regulation of fatty acid metabolism in  
719 bacteria. *Molecular Microbiology*, 66(4), 829–839. [http://doi.org/10.1111/j.1365-](http://doi.org/10.1111/j.1365-2958.2007.05947.x)  
720 [2958.2007.05947.x](http://doi.org/10.1111/j.1365-2958.2007.05947.x)
- 721 Ghou, M., & Mitri, S. (2016). The ecology and evolution of microbial competition.  
722 *Trends in Microbiology*, 24(10), 833–845. <http://doi.org/10.1016/j.tim.2016.06.011>
- 723 Gillis, M., & Logan, N. A. (2005). *Chromobacterium Bergonzini* 1881, 153<sup>AL</sup>. In D. J.  
724 Brenner, N. R. Krieg, J. T. Staley, & G. M. Garrity (Eds.), *Bergeys Manual of*  
725 *Systematic Bacteriology* (2nd ed., Vol. 2, pp. 824–827). New York: Springer.
- 726 Goh, E.-B., Yim, G., Tsui, W., McClure, J., Surette, M. G., & Davies, J. (2002).  
727 Transcriptional modulation of bacterial gene expression by subinhibitory  
728 concentrations of antibiotics. *Proceedings of the National Academy of Sciences of the*  
729 *United States of America*, 99(26), 17025–17030.



- 730 <http://doi.org/10.1073/pnas.252607699>
- 731 Goodman, A. L., McNulty, N. P., Zhao, Y., Leip, D., Mitra, R. D., Lozupone, C. A., et al.  
732 (2009). Identifying genetic determinants needed to establish a human gut symbiont in  
733 its habitat. *Cell Host & Microbe*, 6(3), 279–289.  
734 <http://doi.org/10.1016/j.chom.2009.08.003>
- 735 Harn, Y.-C., Powers, M. J., Shank, E. A., & Jojic, V. (2015). Deconvolving molecular  
736 signatures of interactions between microbial colonies. *Bioinformatics*, 31(12), i142–  
737 50. <http://doi.org/10.1093/bioinformatics/btv251>
- 738 Ho, S. N., Hunt, H. D., Horton, R. M., Pullen, J. K., & Pease, L. R. (1989). Site-directed  
739 mutagenesis by overlap extension using the polymerase chain reaction. *Gene*, 77(1),  
740 51–59.
- 741 Horn, G., Hofweber, R., Kremer, W., & Kalbitzer, H. R. (2007). Structure and function  
742 of bacterial cold shock proteins. *Cell Mol Life Sci*, 64(12), 1457–1470.  
743 <http://doi.org/10.1007/s00018-007-6388-4>
- 744 Li, B., & Dewey, C. N. (2011). RSEM: accurate transcript quantification from RNA-Seq  
745 data with or without a reference genome. *BMC Bioinformatics*, 12(1), 323.  
746 <http://doi.org/10.1186/1471-2105-12-323>
- 747 Liu, Y., Kyle, S., & Straight, P. D. (2018). Antibiotic stimulation of a *Bacillus subtilis*  
748 migratory response. *mSphere*, 3(1), e00586–17.  
749 <http://doi.org/10.1128/mSphere.00586-17>
- 750 Liu, Z., Wang, W., Zhu, Y., Gong, Q., Yu, W., & Lu, X. (2013). Antibiotics at  
751 subinhibitory concentrations improve the quorum sensing behavior of  
752 *Chromobacterium violaceum*. *FEMS Microbiology Letters*, 341(1), 37–44.  
753 <http://doi.org/10.1111/1574-6968.12086>
- 754 Lozano, G. L., Park, H. B., Bravo, J. I., Armstrong, E. A., Denu, J. M., Stabb, E. V., et al.  
755 (2019). Bacterial analogs of plant tetrahydropyridine alkaloids mediate microbial  
756 interactions in a rhizosphere model system. *Applied and Environmental*  
757 *Microbiology*, AEM.03058–18. <http://doi.org/10.1128/AEM.03058-18>
- 758 McClean, K. H., Winson, M. K., Fish, L., Taylor, A., Chhabra, S. R., Camara, M., et al.  
759 (1997). Quorum sensing and *Chromobacterium violaceum*: exploitation of violacein  
760 production and inhibition for the detection of N-acylhomoserine lactones.

- 761 *Microbiology*, 143 ( Pt 12)(12), 3703–3711. <http://doi.org/10.1099/00221287-143->  
762 12-3703
- 763 Newman, D. K., & Banfield, J. F. (2002). Geomicrobiology: how molecular-scale  
764 interactions underpin biogeochemical systems. *Science*, 296(5570), 1071–1077.  
765 <http://doi.org/10.1126/science.1010716>
- 766 Palaniappan, N., Dhote, V., Ayers, S., Starosta, A. L., Wilson, D. N., & Reynolds, K. A.  
767 (2009). Biosynthesis of the aminocyclitol subunit of hygromycin A in *Streptomyces*  
768 *hygroscopicus* NRRL 2388. *Chemistry & Biology*, 16(11), 1180–1189.  
769 <http://doi.org/10.1016/j.chembiol.2009.10.013>
- 770 Pfaffl, M. W. (2001). A new mathematical model for relative quantification in real-time  
771 RT-PCR. *Nucleic Acids Research*, 29(9), e45.
- 772 Ritchie, M. E., Phipson, B., Wu, D., Hu, Y., Law, C. W., Shi, W., & Smyth, G. K.  
773 (2015). limma powers differential expression analyses for RNA-sequencing and  
774 microarray studies. *Nucleic Acids Research*, 43(7), e47–e47.  
775 <http://doi.org/10.1093/nar/gkv007>
- 776 Schloss, P. D., Allen, H. K., Klimowicz, A. K., Mlot, C., Gross, J. A., Savengsuksa, S., et  
777 al. (2010). Psychrotrophic strain of *Janthinobacterium lividum* from a cold Alaskan  
778 soil produces prodigiosin. *DNA and Cell Biology*, 29(9), 533–541.  
779 <http://doi.org/10.1089/dna.2010.1020>
- 780 Sivakumar, R., Ranjani, J., Vishnu, U. S., Jayashree, S., Lozano, G. L., Miles, J., et al.  
781 (2019). Evaluation of INSeq to identify genes essential for *Pseudomonas aeruginosa*  
782 PGPR2 corn root colonization. *G3 (Bethesda, Md.)*, 9(3), 651–661.  
783 <http://doi.org/10.1534/g3.118.200928>
- 784 Stauff, D. L., & Bassler, B. L. (2011). Quorum sensing in *Chromobacterium violaceum*:  
785 DNA recognition and gene regulation by the CviR receptor. *Journal of Bacteriology*,  
786 193(15), 3871–3878. <http://doi.org/10.1128/JB.05125-11>
- 787 Stulberg, E. R., Lozano, G. L., Morin, J. B., Park, H., Baraban, E. G., Mlot, C., et al.  
788 (2016). Genomic and secondary metabolite analyses of *Streptomyces* sp. 2aw provide  
789 insight into the evolution of the cycloheximide pathway. *Frontiers in Microbiology*,  
790 7(R56), 573. <http://doi.org/10.3389/fmicb.2016.00573>
- 791 Swem, L. R., Swem, D. L., O'Loughlin, C. T., Gatmaitan, R., Zhao, B., Ulrich, S. M., &

- 792 Bassler, B. L. (2009). A quorum-sensing antagonist targets both membrane-bound  
793 and cytoplasmic receptors and controls bacterial pathogenicity. *Molecular Cell*,  
794 35(2), 143–153. <http://doi.org/10.1016/j.molcel.2009.05.029>
- 795 Traxler, M. F., & Kolter, R. (2015). Natural products in soil microbe interactions and  
796 evolution. *Natural Product Reports*, 32(7), 956–970.  
797 <http://doi.org/10.1039/c5np00013k>
- 798 VanBogelen, R. A., & Neidhardt, F. C. (1990). Ribosomes as sensors of heat and cold  
799 shock in *Escherichia coli*. *Proceedings of the National Academy of Sciences of the*  
800 *United States of America*, 87(15), 5589–5593.
- 801 Wilson, D. N. (2014). Ribosome-targeting antibiotics and mechanisms of bacterial  
802 resistance. *Nature Reviews. Microbiology*, 12(1), 35–48.  
803 <http://doi.org/10.1038/nrmicro3155>  
804

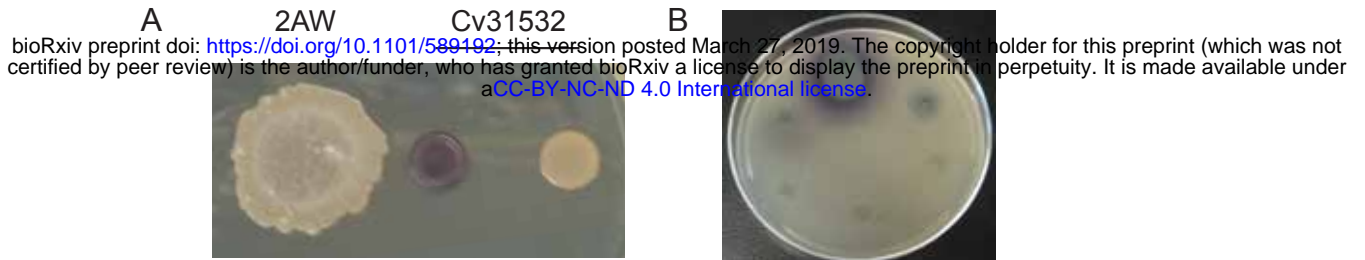

**Figure 1.** Violacein production by *C. violaceum* ATCC31532 (Cv31532) is induced by antibiotics produced by *Streptomyces* spp. (A) *C. violaceum* ATCC31532 growth with *Streptomyces* sp. 2AW (2AW). (B) HPLC fractions of methanol extract from *Streptomyces* sp. 2AW culture spotted on solid medium spread with *C. violaceum* ATCC31532. (C) *C. violaceum* ATCC31532 growth with *S. hygroscopicus* NRRL 2388 (NRRL2388) wild type (WT) and two mutants with reduced ( $\Delta$ hyg17) or abolished ( $\Delta$ hyg8) hygromycin A production.

A

bioRxiv preprint doi: <https://doi.org/10.1101/589192>; this version posted March 27, 2019. The copyright holder for this preprint (which was not certified by peer review) is the author/funder, who has granted bioRxiv a license to display the preprint in perpetuity. It is made available under aCC-BY-NC-ND 4.0 International license.

B

|               |                                                     |            |              |                                                                                     | NA                                                                                  | Tet                                                                                 | Spec                                                                                | Ery                                                                                 | 28°C                                                                                | 16°C                                                                                |
|---------------|-----------------------------------------------------|------------|--------------|-------------------------------------------------------------------------------------|-------------------------------------------------------------------------------------|-------------------------------------------------------------------------------------|-------------------------------------------------------------------------------------|-------------------------------------------------------------------------------------|-------------------------------------------------------------------------------------|-------------------------------------------------------------------------------------|
|               |                                                     |            |              |                                                                                     |  |  |  |  |  |  |
| Mutated genes |                                                     |            |              |                                                                                     |                                                                                     |                                                                                     |                                                                                     |                                                                                     |                                                                                     |                                                                                     |
| Gene ID       | Predicted Function                                  | Class      | Name         | NA                                                                                  | Tet                                                                                 | Spec                                                                                | Ery                                                                                 | 28°C                                                                                | 16°C                                                                                |                                                                                     |
| CLV04_2302    | Oxidoreductase molybdopterin binding domain protein | Signaling  | <i>airM</i>  |  |  |  |  |  |  |                                                                                     |
| CLV04_2301    | Sensor histidine kinase                             | Signaling  | <i>airS</i>  |  |  |  |  |  |  |                                                                                     |
| CLV04_2300    | Response regulator                                  | Signaling  | <i>airR</i>  |  |  |  |  |  |  |                                                                                     |
| CLV04_3834    | Long chain fatty-acid CoA ligase                    | Others     | <i>fadD2</i> |  |  |  |  |  |  |                                                                                     |
| CLV04_1656    | Phosphoenolpyruvate synthase                        | Metabolism | <i>ppsA</i>  |  |  |  |  |  |  |                                                                                     |

**Figure 2.** Genes involved in induction of violacein production. (A) Violacein production in response to several inducers in *C. violaceum* ATCC31532 wild type (WT). (B) *C. violaceum* ATCC31532 mutants affected in violacein production in response to all inducers tested. NA, No Antibiotic. Tet, Tetracycline. Spec, Spectinomycin. Ery, Erythromycin.

## Antibiotic-Induced Response (*air*) system

bioRxiv preprint doi: <https://doi.org/10.1101/589192>; this version posted March 27, 2019. The copyright holder for this preprint (which was not certified by peer review) is the author/funder, who has granted bioRxiv a license to display the preprint in perpetuity. It is made available under aCC-BY-NC-ND 4.0 International license.

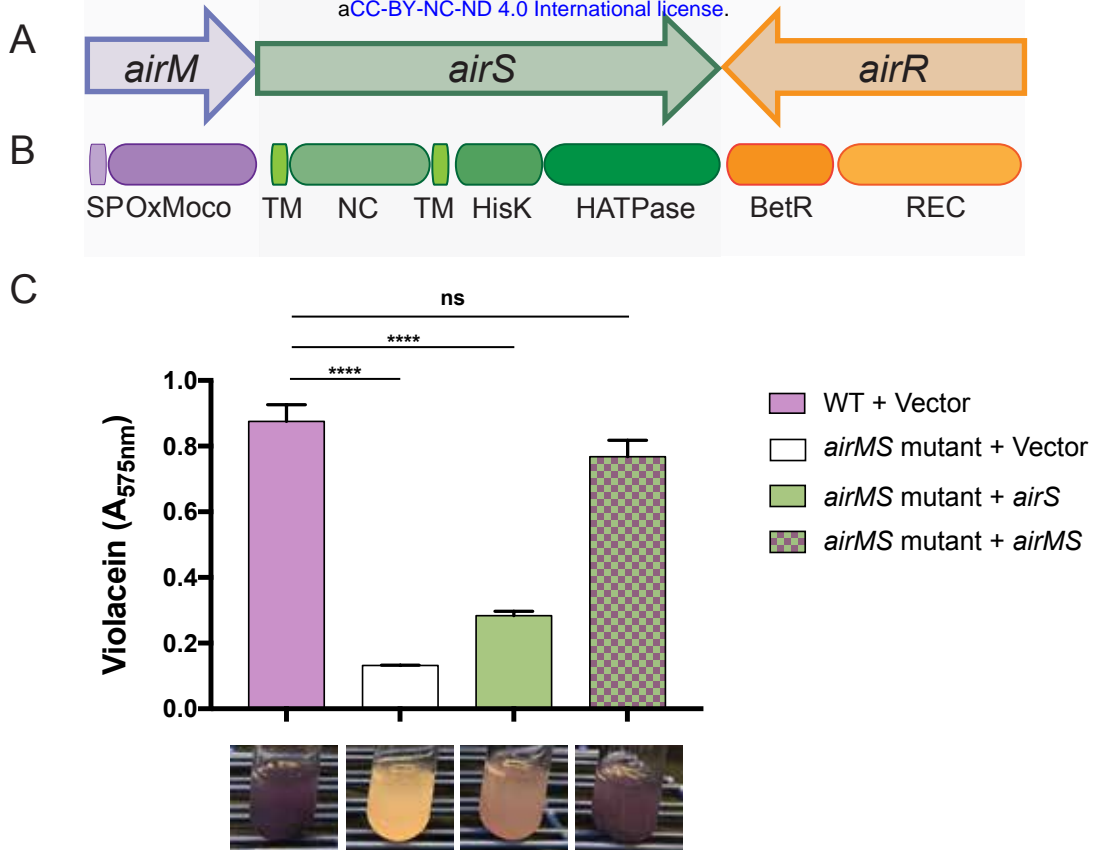

**Figure 3.** Antibiotic-induced response system. Two-component regulatory system identified by mutant analysis. (A) Gene organization; (B) Functional domains in predicted proteins. SP, signal peptide; OxMoco, oxidoreductase molybdopterin-binding domain superfamily (IPR036374); TM, transmembrane domain; NC, non-cytoplasmic domain; HisK, signal transduction histidine kinase, dimerization/phosphoacceptor domain superfamily (IPR036097); HATPase, histidine kinase/HSP90-like ATPase superfamily (IPR036890); REC, CheY-like phosphoacceptor receiver domain (IPR001789); BetR, beta-proteobacterial transcriptional regulator (IPR013975). (C) Production of violacein in wild type (WT) carrying an empty vector and in *airMS* mutant with empty vector or vector carrying *airS* or *airMS*. \*\*\*\*  $P \leq 0.0001$ ; ns, no significant ( $P > 0.05$ ).

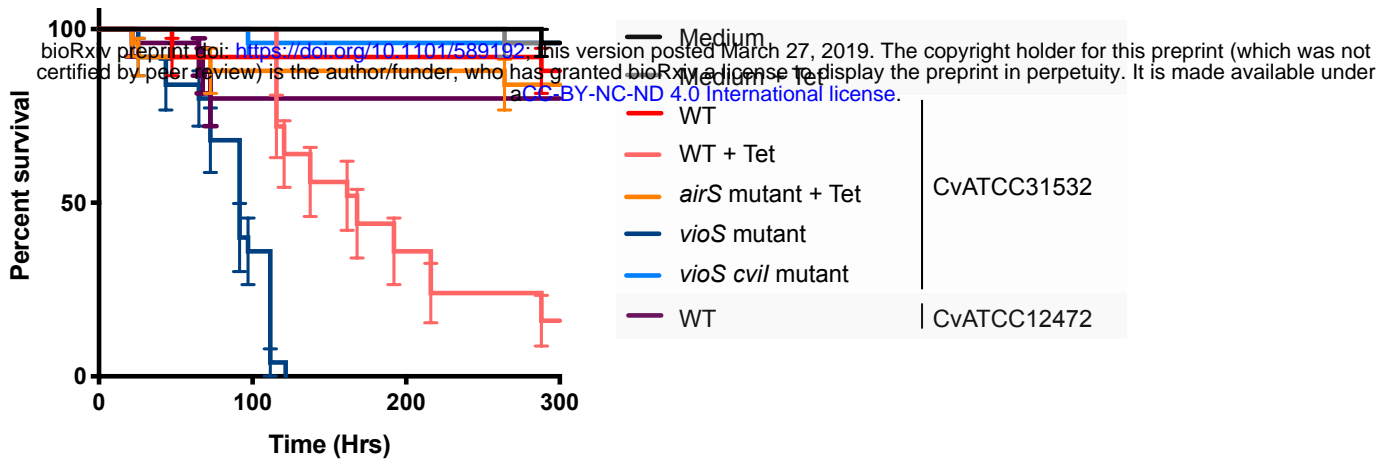

**Figure 4.** Insecticidal activity of *C. violaceum* ATCC31532 is enhanced by tetracycline. Insecticidal activity of *C. violaceum* against *Drosophila melanogaster* in response to a sublethal concentration of tetracycline. *C. violaceum* ATCC31332 (CvATCC31532) wild type (WT), *airS*, *vioS*, *vioS cvil* mutants, and *C. violaceum* ATCC12472 (CvATCC12472) wild type (WT) were evaluated. Tet, Tetracycline.

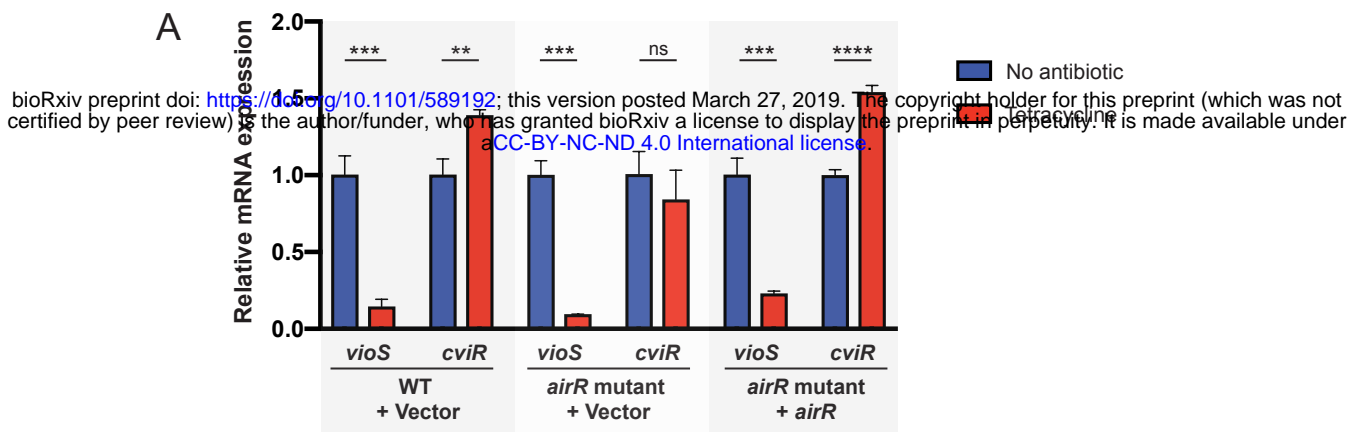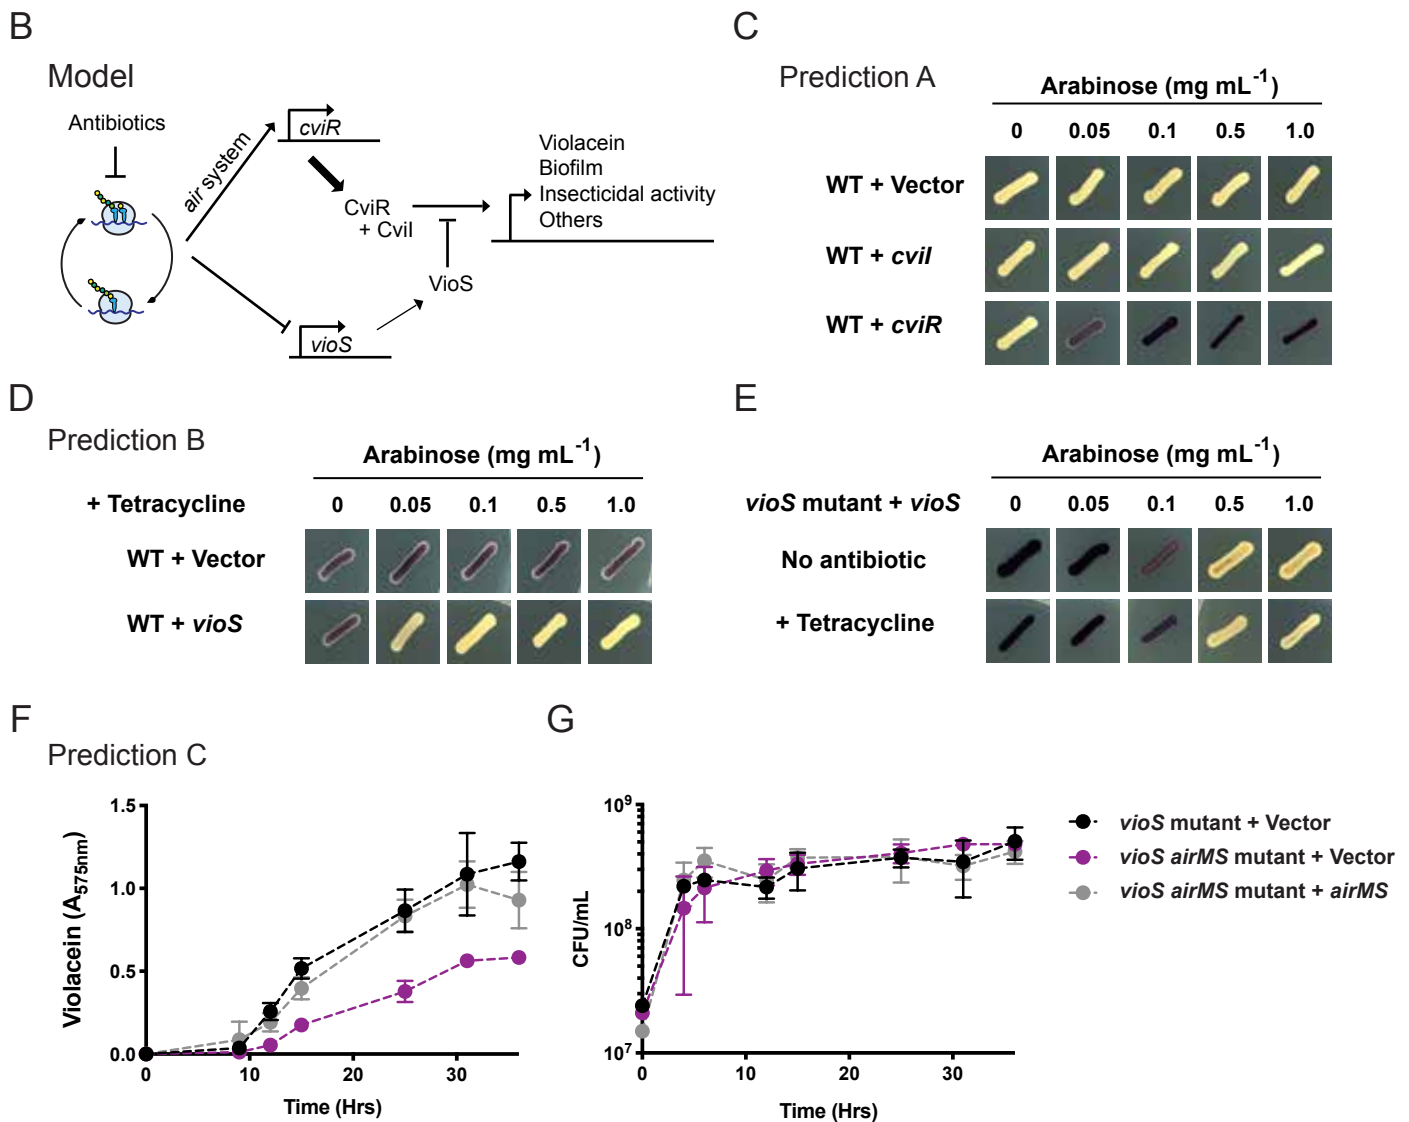

**Figure 5.** A sublethal concentration of tetracycline bypasses *vioS* repression of violacein production mediated by differential expression of *vioS* and *cviR*. (A) mRNA levels of *vioS* and *cviR* from *C. violaceum* ATCC31532 wild type (WT) carrying an empty vector, and *airR* mutant carrying an empty vector, and *airR* mutant carrying a wild-type copy of *airR* in the presence and absence of tetracycline. \*\*  $P \leq 0.01$ ; \*\*\*\*  $P \leq 0.0001$ ; ns, no significant ( $P > 0.05$ ). (B) Proposed model for violacein induction by translation inhibitors. (C) Overexpression of *cviI* and *cviR* under arabinose regulation. (D) Overexpression of *vioS* under arabinose regulation in the presence of sublethal concentration of tetracycline. (E) Complementation of *vioS* mutant with *vioS* gene under regulation by arabinose, with and without tetracycline. (F) Violacein production by *vioS* and *vioS airMS* mutants. (G) Growth of *vioS* and *vioS airMS* mutants. Symbol legend applies to both (F) and (G).



| Target                      | Antibiotic                             | Mode of Action                                                                                                                                                                                 | References                                                                   | Activity |
|-----------------------------|----------------------------------------|------------------------------------------------------------------------------------------------------------------------------------------------------------------------------------------------|------------------------------------------------------------------------------|----------|
| Membrane                    | Polymyxin B                            | bind to destabilizes cell membrane.                                                                                                                                                            | Yu et al., 2015                                                              |          |
|                             | Ceftazidime                            | blocks bacterial cell wall synthesis by binding to penicillin-binding protein 3.                                                                                                               | Hayes & Orr, 1983                                                            |          |
| Cell Wall                   | Piperacillin                           | blocks bacterial cell wall synthesis by inhibiting penicillin-binding proteins.                                                                                                                | Mitsuyama et al., 1987                                                       |          |
|                             | Vancomycin                             | blocks bacterial cell wall synthesis by binding to the D-Ala-D-Ala end of the peptide preventing transglycosylation and transpeptidation of peptidoglycan precursors.                          | Barna & Williams, 1984                                                       |          |
| RNA Synthesis               | Rifampicin                             | inhibits transcription by binding to the RNA polymerase.                                                                                                                                       | Wehrli, 1983                                                                 |          |
| DNA Replication             | Nalidixic acid                         | inhibits DNA synthesis by blocking DNA gyrase activity.                                                                                                                                        | Sugino et al., 1977                                                          |          |
| Metabolism                  | Trimethoprim                           | binds to dihydrofolate reductase blocking the reduction of dihydrofolate to tetrahydrofolate, the last essential step for thymidine biosynthesis.                                              | Gleckman et al., 1981                                                        |          |
| Protein Synthesis           |                                        |                                                                                                                                                                                                |                                                                              |          |
| Translation initiation      | Kasugamycin                            | interacts with the mRNA-ribosome complex blocking the path of the 5'-UTR of the mRNA upstream of the start codon, thereby interfering with initiation of tRNA binding to the P-site.           | Schluenzen et al., 2006; Schuwirth et al., 2006                              |          |
| Ribosome subunit recycling  | Fusidic acid                           | binds with the elongation factor G and inhibits ribosome disassembly activity by the elongation factor G with recycling factor complex after translation completes.                            | Savelsbergh et al., 2009                                                     |          |
| Premature chain termination | Puromycin                              | inhibits protein synthesis by competing with aminoacyl-tRNAs, causing premature release of polypeptide from ribosome.                                                                          | Darken, 1964                                                                 |          |
| Mistranslation induction    | Kanamycin, Paromomycin, Streptomycin   | bind to the A-site in the decoding center of the 30S subunit, interfering with the recognition of cognate tRNA by rRNA resulting in insertion of incorrect amino acids into polypeptides.      | Kotra et al, 2000; Davies, 1964                                              |          |
| Elongation and Termination  | Blasticidin S                          | blocks translation by bending the CCA end of the P-site tRNA toward the A site, thereby inhibiting peptidyl-tRNA hydrolysis by release factors and with lower activity peptide bond formation. | Svidritskiy et al., 2013                                                     |          |
| Elongation                  | Spectinomycin, Hygromycin B, Apramycin | bind at the decoding center of the 30S subunit, inhibiting translocation of mRNA and tRNAs.                                                                                                    | Borovinskaya et al., 2008; Borovinskaya et al., 2007; Perzynski et al., 1979 |          |
|                             | Tetracycline                           | binds to 30S subunit, interfering with the bind of aminoacyl-tRNA to the A site of the ribosomal complex.                                                                                      | Chopra & Roberts, 2001                                                       |          |
|                             | Erythromycin                           | binds in the 50S subunit adjacent to the peptidyl-transferase center within the ribosomal exit tunnel blocking passage of newly polypeptide through the exit tunnel interrupting elongation.   | Kannan & Mankin, 2011                                                        |          |
|                             | Chloramphenicol                        | binds in the 50S subunit at the peptidyl-transferase center overlapping with the aminoacyl moiety of the tRNA and inhibiting peptide-bond formation.                                           | Bulkley et al., 2010; Dunkle et al., 2010                                    |          |

## References

- Barna, J. C.; Williams, D. H. Annu. Rev. Microbiol. 1984, 38 (1), 339.
- Borovinskaya, M. A.; Shoji, S.; Holton, J. M.; Fredrick, K.; Cate, J. H. D. ACS Chem. Biol. 2007, 2 (8), 545.
- Borovinskaya, M. A.; Shoji, S.; Fredrick, K.; Cate, J. H. D. RNA 2008, 14 (8), 1590.
- Bulkley, D.; Innis, C. A.; Blaha, G.; Steitz, T. A. Proc. Natl. Acad. Sci. U.S.A. 2010, 107 (40), 17158.
- Chopra, I.; Roberts, M. Microbiol. Mol. Biol. Rev. 2001, 65 (2), 232.
- Darken, M. A. Pharmacol. Rev. 1964, 16, 223.
- Davies, J. E. Proc. Natl. Acad. Sci. U.S.A. 1964, 51 (4), 659.
- Dunkle, J. A.; Xiong, L.; Mankin, A. S.; Cate, J. H. D. Proc. Natl. Acad. Sci. U.S.A. 2010, 107 (40), 17152.
- Gleckman, R.; Blagg, N.; Joubert, D. W. Pharmacotherapy 1981, 1 (1), 14.
- Hayes, M. V.; Orr, D. C. J. Antimicrob. Chemother. 1983, 12 (2), 119.
- Kannan, K.; Mankin, A. S. Ann. N. Y. Acad. Sci. 2011, 1241 (1), 33.
- Kotra, L. P.; Haddad, J.; Mobashery, S. Antimicrob Agents Chemother 2000, 44 (12), 3249.
- Mitsuyama, J.; Takahata, M.; Yasuda, T.; Saikawa, I. The Journal of Antibiotics 1987, 40 (6), 868.
- Perzynski, S.; Cannon, M.; Cundliffe, E.; Chahwala, S. B.; Davies, J. Eur. J. Biochem. 1979, 99 (3), 623.
- Savelsbergh, A.; Rodnina, M. V.; Wintermeyer, W. RNA 2009, 15 (5), 772.
- Schluenzen, F.; Takemoto, C.; Wilson, D. N.; Kaminishi, T.; Harms, J. M.; Hanawa-Suetsugu, K.; Szaflarski, W.; Kawazoe, M.; Shirouzu, M.; Shirouzu, M.; Nierhaus, K. H.; Yokoyama, S.; Fucini, P. Nat. Struct. Mol. Biol. 2006, 13 (10), 871.
- Schuwirth, B. S.; Day, J. M.; Hau, C. W.; Janssen, G. R.; Dahlberg, A. E.; Cate, J. H. D.; Vila-Sanjurjo, A. Nat. Struct. Mol. Biol. 2006, 13 (10), 879.
- Sugino, A.; Peebles, C. L.; Kreuzer, K. N.; Cozzarelli, N. R. Proc. Natl. Acad. Sci. U.S.A. 1977, 74 (11), 4767.
- Svidritskiy, E.; Ling, C.; Ermolenko, D. N.; Korostelev, A. A. Proc. Natl. Acad. Sci. U.S.A. 2013, 110 (30), 12283.
- Wehrli, W. Rev. Infect. Dis. 1983, 5 Suppl 3, S407.
- Yu, Z.; Qin, W.; Lin, J.; Fang, S.; Qiu, J. Biomed Res Int 2015, 2015 (6), 679109.

**Figure supplement 1.** Profile of *C. violaceum* ATCC31532 violacein production in response to structurally diverse antibiotics. Antibiotics are classified by cellular target.

|               |             |                                                              |            |              | NA | Tet | Spec | Ery | 28°C | 16°C |
|---------------|-------------|--------------------------------------------------------------|------------|--------------|----|-----|------|-----|------|------|
|               |             |                                                              |            |              |    |     |      |     |      |      |
| Mutated genes |             |                                                              |            |              |    |     |      |     |      |      |
|               | Gene ID     | Predicted Function                                           | Class      | Name         | NA | Tet | Spec | Ery | 28°C | 16°C |
| A             | CLV04_2730  | SAM-dependent methyltransferase                              | Others     |              |    |     |      |     |      |      |
|               | CLV04_2412  | Transcriptional repressor of <i>cdeAB-oprM</i> drug exporter | Signaling  | <i>cdeR</i>  |    |     |      |     |      |      |
|               | CLV04_1292  | Phosphoglyceromutase                                         | Metabolism | <i>pgm</i>   |    |     |      |     |      |      |
|               | CLV04_2695  | Phosphoglycerate kinase                                      | Metabolism | <i>pgk</i>   |    |     |      |     |      |      |
|               | CLV04_1869* | MarR family transcriptional regulator                        | Signaling  |              |    |     |      |     |      |      |
| B             | CLV04_3464  | GntR family transcriptional regulator                        | Signaling  |              |    |     |      |     |      |      |
|               | CLV04_3178  | Multidrug ABC transporter ATP-binding protein                | Others     |              |    |     |      |     |      |      |
|               | CLV04_1011  | Enoyl-CoA hydratase                                          | Others     | <i>fadB2</i> |    |     |      |     |      |      |

**Figure supplement 2.** Additional genes involved in induction of violacein production by several inducers. (A) *C. violaceum* ATCC31532 mutants with a disrupted violacein production in response to some of the inducers tested. (B) *C. violaceum* ATCC31532 mutants with increased violacein production in response to some of the inducers tested. NA, No Antibiotic. Tet, Tetracycline. Spec, Spectinomycin. Ery, Erythromycin. \* Transposons in promotor.

*Chromobacterium violaceum* ATCC31532

bioRxiv preprint doi: <https://doi.org/10.1101/539192>; this version posted March 27, 2019. The copyright holder for this preprint (which was not certified by peer review) is the author/funder, who has granted bioRxiv a license to display the preprint in perpetuity. It is made available under aCC-BY-NC-ND 4.0 International license.

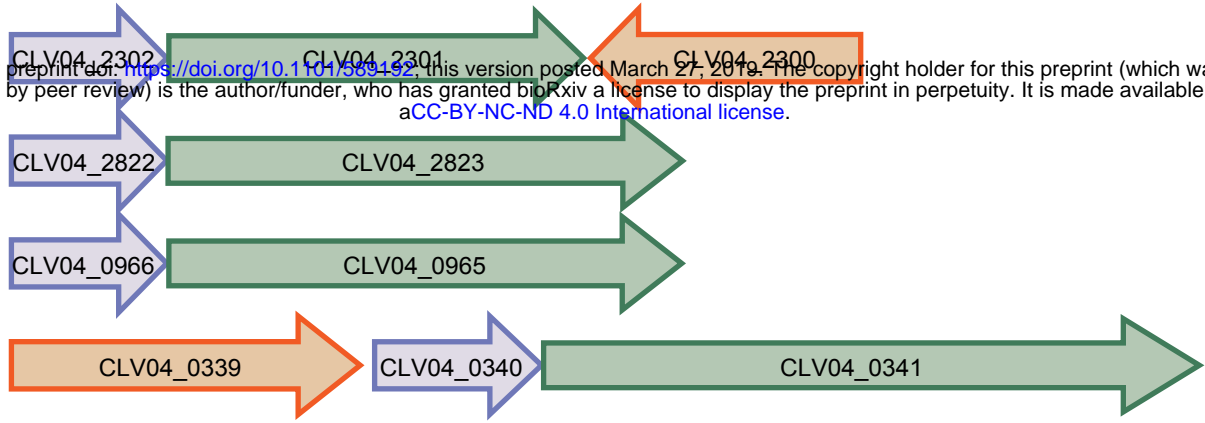

*Chromobacterium violaceum* ATCC12472

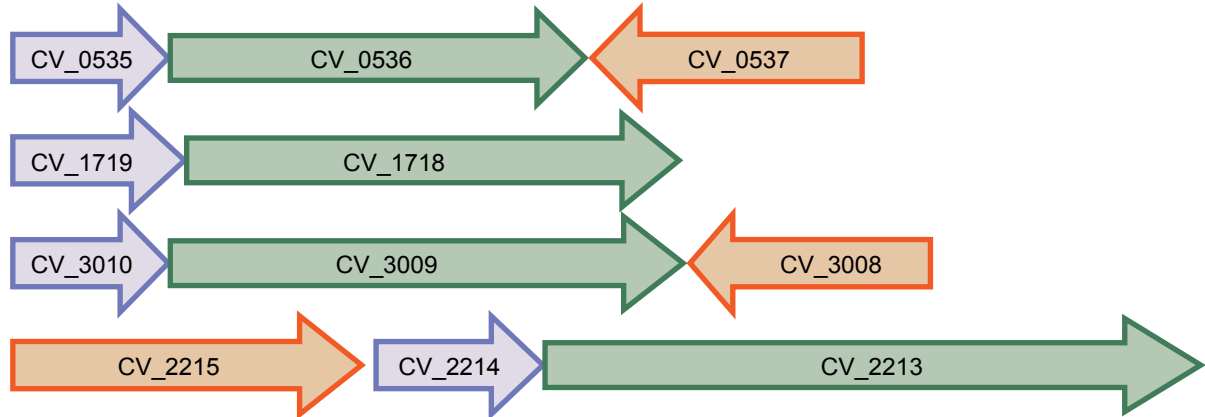

*Chromobacterium vaccinii* XC0014

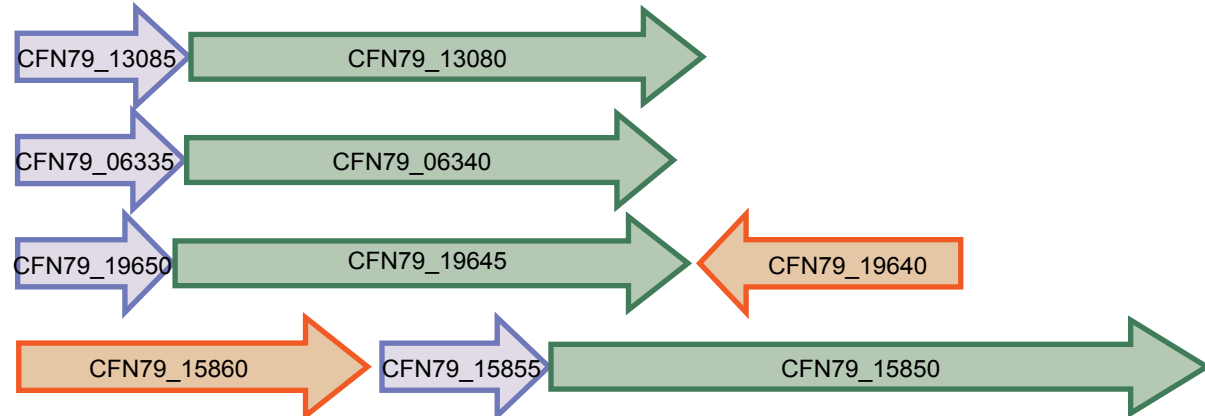

*Burkholderia thailandensis* E264

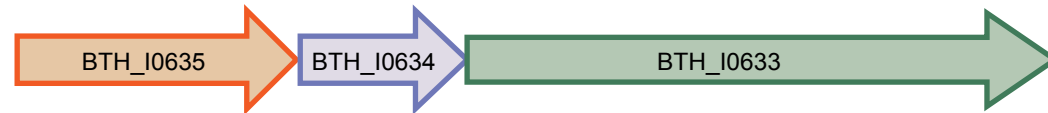

*Burkholderia cepacia* ATCC25416

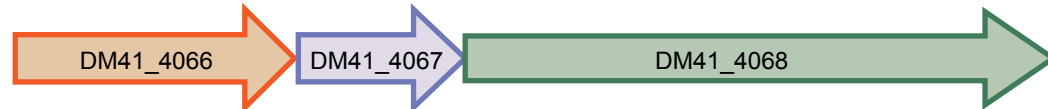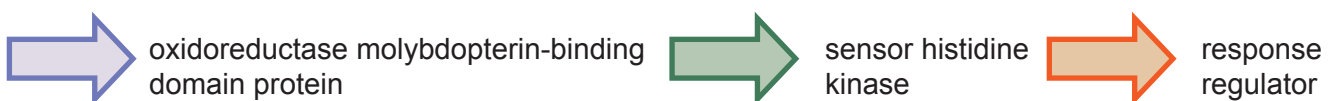

**Figure supplement 3.** Other pair genes that encode oxidoreductase molybdopterin-binding domain (OxMoco)(IPR036374) proteins next to a sensor histidine kinases in *Chromobacterium* and *Burkholderia* spp genomes.

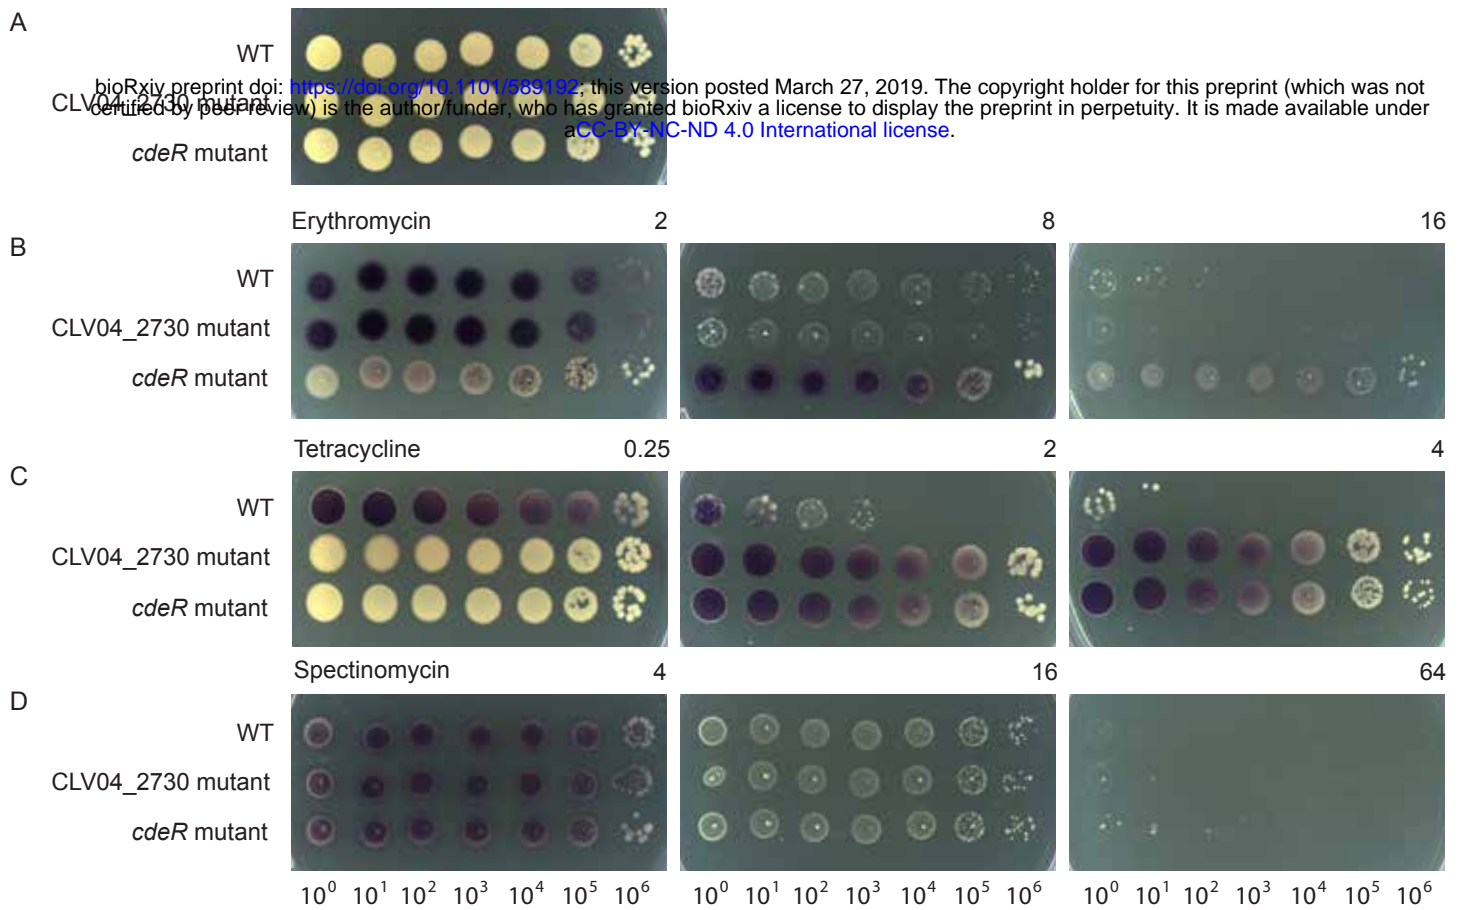

**Figure supplement 4.** Dose-dependent violacein production in two antibiotic-resistant mutants. Survival and violacein production of *C. violaceum* ATCC31532 wild type (WT), mutant in a SAM-dependent methyltransferase (CLV04\_2730), and mutant in *cdeR*, a transcriptional repressor of the *cdeAB-oprM* multidrug efflux pump system (CLV04\_2412) with (A) no antibiotic; (B) Erythromycin ( $\mu\text{g ml}^{-1}$ ); (C) Tetracycline ( $\mu\text{g ml}^{-1}$ ); (D) Spectinomycin ( $\mu\text{g ml}^{-1}$ ).

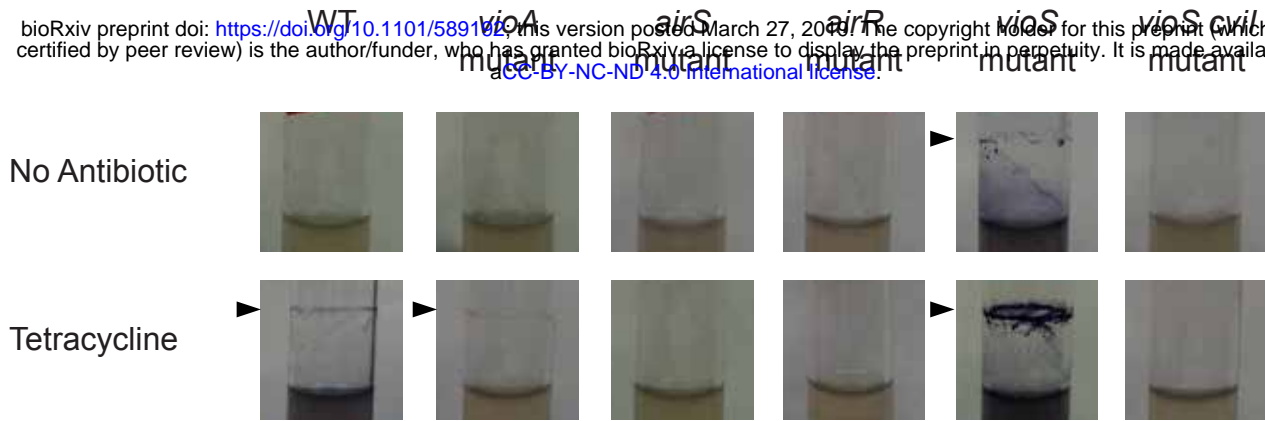

**Figure supplement 5.** *C. violaceum* ATCC31532 biofilm formation on glass in response to a sublethal concentration of tetracycline. Biofilm formation by *C. violaceum* ATCC31532 wild type (WT), *viaA*, *airS*, *airR*, *vioS*, and *vioS cviI* mutants without antibiotics, or in the presence of tetracycline (0.25  $\mu\text{g ml}^{-1}$ ). Violacein mutant, *viaA*, was used as a control for a biofilm visualization without violacein pigmentation. Arrow indicates the location of the biofilm.

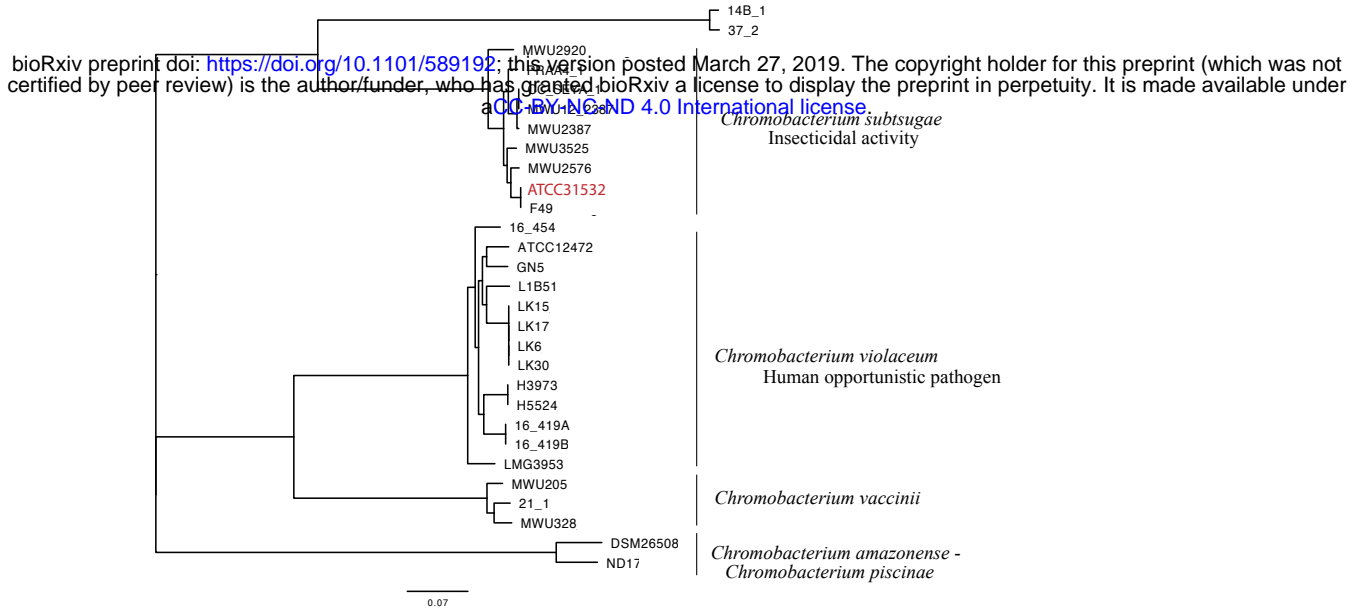

**Figure supplement 6.** Phylogenetic relatedness of several *Chromobacterium* spp. Highlight in red *C. violaceum* ATCC31532.

A

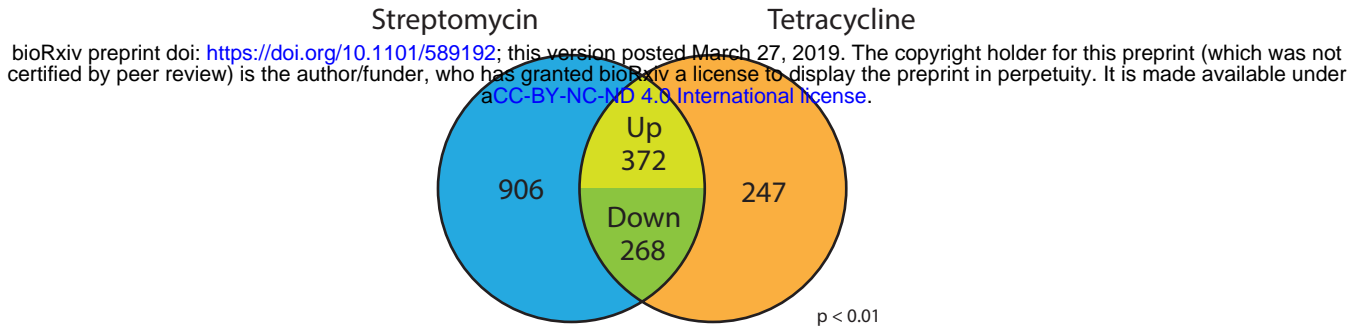

B

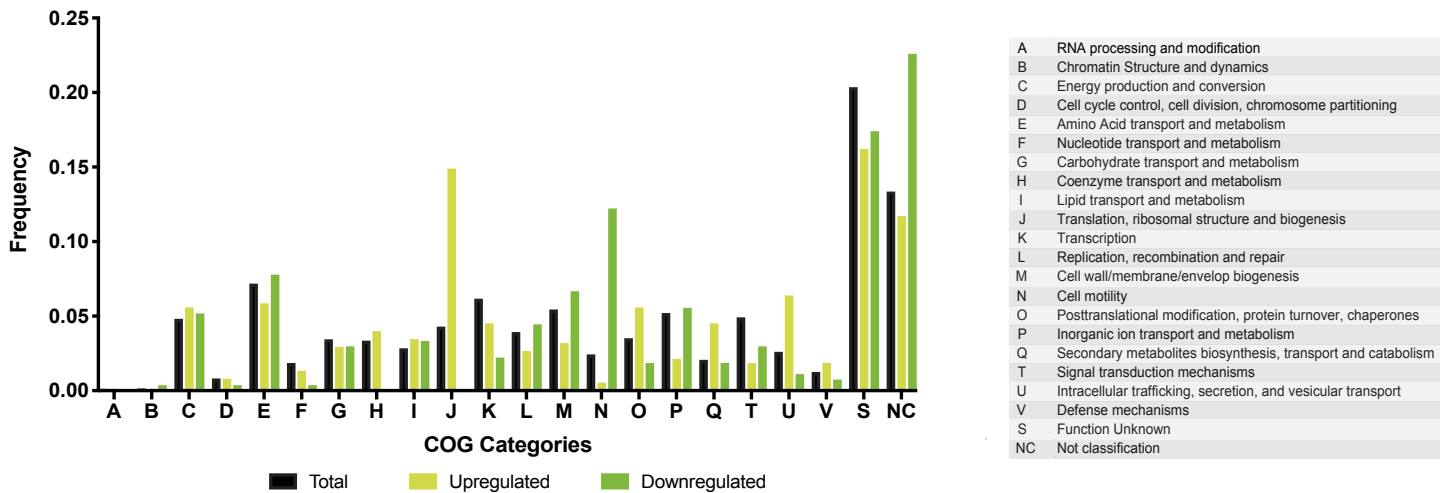

**Figure supplement 7.** Transcriptome analysis of *C. violaceum* ATCC31532 in the presence and absence of a sublethal concentration of translation inhibitors. The analysis indicates change in expression from the baseline condition with no antibiotics. (A) Venn diagram of gene differentially expressed by *C. violaceum* ATCC31532 wild type (WT) in streptomycin or tetracycline. (B) COG classification of the differentially genes expressed in streptomycin and tetracycline.



**Table supplement 1.** Genes expressed differentially in response to streptomycin and tetracycline.

| Gene ID                                              | Predicted Function                                                       | COGs ID | COG Category | WT<br>No Antibiotic VS Spectinomycin |         | WT<br>No Antibiotic VS Tetracycline |         |
|------------------------------------------------------|--------------------------------------------------------------------------|---------|--------------|--------------------------------------|---------|-------------------------------------|---------|
|                                                      |                                                                          |         |              | Log <sub>2</sub> (Fold change)       | P Value | Log <sub>2</sub> (Fold change)      | P Value |
| <b>Genes downregulated by translation inhibition</b> |                                                                          |         |              |                                      |         |                                     |         |
| CLV04_0046                                           | hypothetical protein                                                     |         |              | 0.83                                 | 7.2E-03 | 1.12                                | 1.8E-03 |
| CLV04_0067                                           | long-chain fatty acid transport protein                                  | COG2067 | I            | 1.89                                 | 3.4E-07 | 1.02                                | 2.4E-04 |
| CLV04_0075                                           | uncharacterized protein DUF946                                           |         | S            | 0.84                                 | 4.6E-03 | 1.41                                | 2.0E-04 |
| CLV04_0107                                           | dienelactone hydrolase                                                   | COG0412 | Q            | 0.62                                 | 9.0E-04 | 0.79                                | 2.1E-04 |
| CLV04_0173                                           | amino acid/amide ABC transporter substrate-binding protein (HAAT family) | COG0683 | E            | 2.39                                 | 5.8E-07 | 1.27                                | 4.4E-04 |
| CLV04_0203                                           | TcdB toxin-like protein                                                  |         | S            | 1.68                                 | 2.6E-07 | 0.88                                | 2.6E-04 |
| CLV04_0282                                           | Fe-Mn family superoxide dismutase                                        | COG0605 | P            | 1.35                                 | 2.4E-06 | 1.37                                | 4.4E-06 |
| CLV04_0414                                           | gamma-glutamyl-gamma-aminobutyraldehyde dehydrogenase                    | COG1012 | C            | 2.74                                 | 3.1E-07 | 1.58                                | 1.3E-04 |
| CLV04_0421                                           | uncharacterized protein DUF3141                                          |         | S            | 2.18                                 | 5.1E-07 | 1.67                                | 1.5E-05 |
| CLV04_0427                                           | RHS repeat-associated protein                                            | COG3209 | M            | 1.08                                 | 3.6E-04 | 1.42                                | 7.6E-05 |
| CLV04_0428                                           | hypothetical protein                                                     |         |              | 2.92                                 | 4.9E-06 | 4.04                                | 9.8E-07 |
| CLV04_0444                                           | hypothetical protein                                                     |         |              | 1.62                                 | 6.1E-03 | 2.40                                | 8.8E-04 |
| CLV04_0447                                           | hypothetical protein                                                     | COG1574 | S            | 2.47                                 | 2.5E-07 | 1.31                                | 1.1E-04 |
| CLV04_0475                                           | hypothetical protein                                                     | COG3558 | S            | 2.10                                 | 2.5E-06 | 2.44                                | 1.6E-06 |
| CLV04_0491                                           | hypothetical protein                                                     |         |              | 0.87                                 | 4.8E-03 | 1.32                                | 4.1E-04 |
| CLV04_0506                                           | DNA polymerase V                                                         | COG0389 | L            | 1.72                                 | 3.7E-06 | 0.88                                | 1.5E-03 |
| CLV04_0521                                           | hypothetical protein                                                     |         |              | 1.73                                 | 1.9E-03 | 3.02                                | 8.9E-05 |
| CLV04_0555                                           | Protein of unknown function (DUF3037)                                    |         | S            | 1.54                                 | 1.1E-04 | 2.22                                | 7.3E-06 |
| CLV04_0563                                           | hypothetical protein                                                     |         |              | 1.09                                 | 5.8E-04 | 2.06                                | 7.0E-06 |
| CLV04_0572                                           | hypothetical protein                                                     |         |              | 2.04                                 | 2.4E-03 | 2.52                                | 9.3E-04 |
| CLV04_0604                                           | hypothetical protein                                                     |         |              | 0.95                                 | 6.5E-03 | 1.28                                | 1.3E-03 |
| CLV04_0667                                           | hypothetical protein                                                     |         |              | 1.32                                 | 1.6E-03 | 2.12                                | 8.8E-05 |
| CLV04_0668                                           | wobble nucleotide-excising tRNase                                        | COG4694 |              | 1.76                                 | 3.7E-03 | 3.01                                | 1.1E-04 |
| CLV04_0680                                           | hypothetical protein                                                     |         |              | 1.35                                 | 4.5E-05 | 0.73                                | 6.9E-03 |
| CLV04_0754                                           | aspartate semialdehyde dehydrogenase                                     | COG0136 | E            | 1.48                                 | 1.5E-06 | 1.46                                | 3.6E-06 |
| CLV04_0757                                           | 3-isopropylmalate dehydrogenase                                          | COG0473 | E            | 0.69                                 | 3.0E-04 | 0.49                                | 6.6E-03 |
| CLV04_0762                                           | 3-isopropylmalate dehydratase large subunit                              | COG0065 | E            | 0.96                                 | 1.2E-04 | 0.59                                | 7.2E-03 |
| CLV04_0769                                           | acetyl-CoA acetyltransferase                                             | COG0183 | I            | 1.03                                 | 4.9E-04 | 0.80                                | 5.0E-03 |
| CLV04_0791                                           | peroxiredoxin Q/BCP                                                      | COG1225 | O            | 0.57                                 | 4.5E-03 | 0.93                                | 1.9E-04 |
| CLV04_0792                                           | PhoH-like ATPase                                                         | COG1875 | T            | 2.60                                 | 5.3E-08 | 1.53                                | 2.0E-05 |
| CLV04_0793                                           | Ca <sup>2+</sup> -binding RTX toxin-like protein                         | COG2931 | Q            | 2.78                                 | 5.8E-09 | 2.58                                | 5.9E-08 |
| CLV04_0796                                           | ATP-binding cassette, subfamily B, HlyB/CyaB                             | COG2274 | V            | 1.61                                 | 1.1E-05 | 1.19                                | 2.5E-04 |
| CLV04_0800                                           | Ca <sup>2+</sup> -binding RTX toxin-like protein                         | COG2931 | Q            | 2.84                                 | 3.9E-05 | 2.21                                | 4.7E-04 |
| CLV04_0828                                           | flagellar hook-associated protein 3 FlgL                                 | COG1344 | N            | 1.64                                 | 2.7E-07 | 1.05                                | 4.3E-05 |
| CLV04_0829                                           | flagellar hook-associated protein 1 FlgK                                 | COG1256 | N            | 1.88                                 | 1.5E-07 | 1.24                                | 1.8E-05 |
| CLV04_0830                                           | flagellar protein FlgJ                                                   | COG1705 | N            | 2.24                                 | 1.6E-06 | 1.41                                | 1.7E-04 |
| CLV04_0831                                           | flagellar P-ring protein precursor FlgI                                  | COG1706 | N            | 1.62                                 | 3.4E-07 | 1.07                                | 3.4E-05 |
| CLV04_0832                                           | flagellar L-ring protein precursor FlgH                                  | COG2063 | N            | 2.53                                 | 5.9E-08 | 1.65                                | 5.0E-06 |
| CLV04_0833                                           | flagellar basal-body rod protein FlgG                                    | COG4786 | N            | 2.46                                 | 3.6E-07 | 1.48                                | 5.0E-05 |
| CLV04_0834                                           | flagellar basal-body rod protein FlgF                                    | COG4787 | N            | 3.13                                 | 4.2E-08 | 1.72                                | 1.2E-05 |
| CLV04_0835                                           | flagellar hook protein FlgE                                              | COG1749 | N            | 3.59                                 | 5.9E-09 | 1.75                                | 1.1E-05 |
| CLV04_0836                                           | flagellar basal-body rod modification protein FlgD                       | COG1843 | N            | 2.80                                 | 3.1E-07 | 1.35                                | 3.3E-04 |
| CLV04_0837                                           | flagellar basal-body rod protein FlgC                                    | COG1558 | N            | 1.73                                 | 3.2E-06 | 1.25                                | 1.0E-04 |
| CLV04_0838                                           | flagellar basal-body rod protein FlgB                                    | COG1815 | N            | 2.31                                 | 5.9E-06 | 1.52                                | 3.1E-04 |



|            |                                                                              |         |      |      |         |      |         |
|------------|------------------------------------------------------------------------------|---------|------|------|---------|------|---------|
| CLV04_0870 | acyl dehydratase                                                             | COG2030 | I    | 1.30 | 1.7E-04 | 1.06 | 1.4E-03 |
| CLV04_0893 | hypothetical protein                                                         |         |      | 3.37 | 5.6E-09 | 1.67 | 4.1E-06 |
| CLV04_0945 | flagellar FliL protein                                                       |         | S    | 1.02 | 3.9E-03 | 2.39 | 1.5E-05 |
| CLV04_0946 | flagellar hook-length control protein FliK                                   | COG3144 | N    | 1.33 | 4.1E-04 | 2.61 | 3.3E-06 |
| CLV04_0947 | hypothetical protein                                                         |         |      | 1.50 | 7.6E-04 | 2.85 | 1.4E-05 |
| CLV04_0948 | flagellar protein FliS                                                       | COG1516 | N    | 1.21 | 2.5E-03 | 3.32 | 2.6E-06 |
| CLV04_0950 | flagellar export protein FliJ                                                |         |      | 2.00 | 1.4E-04 | 2.41 | 6.7E-05 |
| CLV04_0951 | flagellum-specific ATP synthase                                              | COG1157 | N, U | 1.84 | 2.5E-04 | 2.06 | 1.9E-04 |
| CLV04_0952 | flagellar assembly protein FliH                                              | COG1317 | N    | 1.74 | 4.1E-05 | 2.27 | 1.0E-05 |
| CLV04_0953 | flagellar motor switch protein FliG                                          | COG1536 | N    | 1.38 | 4.3E-04 | 2.03 | 4.1E-05 |
| CLV04_0954 | flagellar M-ring protein FliF                                                | COG1766 | N    | 1.44 | 1.3E-03 | 2.13 | 1.4E-04 |
| CLV04_0959 | flagellar biosynthetic protein FliQ                                          | COG1987 | N    | 1.41 | 8.4E-04 | 1.09 | 7.2E-03 |
| CLV04_0967 | flagellin                                                                    | COG1344 | N    | 2.73 | 4.0E-06 | 3.97 | 2.3E-07 |
| CLV04_0970 | ribose-binding protein                                                       | COG1879 | G    | 0.75 | 3.2E-04 | 0.72 | 7.3E-04 |
| CLV04_1011 | short chain enoyl-CoA hydratase                                              | COG1024 | I    | 2.93 | 8.6E-08 | 2.53 | 6.5E-07 |
| CLV04_1084 | flagellar hook-length control protein FliK                                   |         | N    | 2.37 | 1.6E-05 | 1.34 | 2.4E-03 |
| CLV04_1115 | hypothetical protein                                                         |         |      | 0.65 | 9.1E-04 | 0.54 | 5.7E-03 |
| CLV04_1172 | transcriptional regulator                                                    | COG0229 | O    | 1.44 | 2.0E-05 | 1.17 | 2.1E-04 |
| CLV04_1174 | hypothetical protein                                                         |         |      | 1.96 | 3.3E-05 | 2.31 | 1.7E-05 |
| CLV04_1175 | hypothetical protein                                                         |         |      | 0.97 | 4.1E-03 | 1.75 | 6.2E-05 |
| CLV04_1176 | putative metal-binding integral membrane protein DUF2182                     |         | S    | 1.59 | 1.4E-05 | 2.38 | 1.0E-06 |
| CLV04_1203 | microbial collagenase                                                        |         | S    | 1.24 | 1.1E-05 | 0.99 | 1.5E-04 |
| CLV04_1228 | cation/acetate symporter                                                     | COG4147 | S    | 1.75 | 1.1E-05 | 1.35 | 2.1E-04 |
| CLV04_1229 | acetyl-coenzyme A synthetase                                                 | COG0365 | I    | 1.37 | 8.7E-06 | 0.84 | 1.2E-03 |
| CLV04_1247 | malate synthase                                                              | COG2225 | C    | 2.27 | 6.9E-06 | 1.47 | 5.4E-04 |
| CLV04_1248 | putative secreted protein                                                    | COG3471 | S    | 1.68 | 3.3E-06 | 1.68 | 7.2E-06 |
| CLV04_1290 | acyl-coenzyme A thioesterase Paal-like protein                               |         |      | 1.45 | 9.8E-05 | 1.13 | 1.2E-03 |
| CLV04_1297 | polyphosphate kinase                                                         | COG0855 | P    | 0.51 | 3.7E-03 | 0.63 | 1.3E-03 |
| CLV04_1314 | phasin family protein                                                        |         | S    | 2.53 | 1.3E-04 | 3.30 | 2.2E-05 |
| CLV04_1365 | putative porin                                                               |         | M    | 1.43 | 1.7E-06 | 0.80 | 7.4E-04 |
| CLV04_1390 | two-component system chemotaxis sensor kinase CheA                           | COG0643 | T    | 1.17 | 9.4E-07 | 0.46 | 6.0E-03 |
| CLV04_1399 | enolase                                                                      | COG0148 | G    | 1.34 | 2.8E-06 | 0.99 | 1.0E-04 |
| CLV04_1420 | hypothetical protein                                                         |         |      | 1.32 | 4.4E-05 | 0.89 | 2.0E-03 |
| CLV04_1442 | LysR family transcriptional regulator                                        |         | K    | 0.69 | 5.5E-03 | 0.68 | 9.2E-03 |
| CLV04_1459 | hypothetical protein                                                         | COG3220 | S    | 0.93 | 2.3E-04 | 0.64 | 6.1E-03 |
| CLV04_1505 | catalase                                                                     | COG0753 | P    | 3.46 | 1.9E-08 | 3.62 | 5.9E-08 |
| CLV04_1515 | acetoin utilization deacetylase AcuC-like enzyme                             | COG0123 | B, Q | 2.51 | 4.1E-04 | 1.92 | 3.7E-03 |
| CLV04_1532 | 3-oxoacyl-[acyl-carrier-protein] reductase                                   |         | I    | 1.75 | 3.7E-06 | 2.95 | 7.0E-08 |
| CLV04_1545 | L-glutamine synthetase                                                       | COG0174 | E    | 2.88 | 7.9E-09 | 1.99 | 7.2E-07 |
| CLV04_1576 | putative acetyltransferase                                                   | COG0454 | K    | 1.01 | 1.0E-03 | 1.12 | 8.1E-04 |
| CLV04_1613 | isocitrate dehydrogenase                                                     | COG2838 | C    | 1.66 | 2.1E-07 | 0.71 | 1.2E-03 |
| CLV04_1714 | uncharacterized protein (TIGR02646 family)                                   |         |      | 3.50 | 5.2E-07 | 4.67 | 1.9E-07 |
| CLV04_1715 | putative ATP-binding protein involved in virulence                           | COG3950 | S    | 2.32 | 2.0E-04 | 3.38 | 1.4E-05 |
| CLV04_1716 | retron-type reverse transcriptase                                            | COG3344 | L    | 1.67 | 1.2E-03 | 2.60 | 6.7E-05 |
| CLV04_1718 | hypothetical protein                                                         |         |      | 1.43 | 3.4E-05 | 2.19 | 2.0E-06 |
| CLV04_1789 | acyl-CoA dehydrogenase                                                       | COG1960 | I    | 1.07 | 7.8E-06 | 0.51 | 6.6E-03 |
| CLV04_1843 | flagellin                                                                    | COG1344 | N    | 2.08 | 9.9E-05 | 3.16 | 3.6E-06 |
| CLV04_1882 | crotonobetainyl-CoA:carnitine CoA-transferase CaiB-like acyl-CoA transferase | COG1804 | C    | 1.73 | 9.9E-08 | 0.60 | 2.3E-03 |
| CLV04_1893 | DHA2 family multidrug resistance protein                                     |         | P    | 1.37 | 3.0E-05 | 0.92 | 1.2E-03 |
| CLV04_1940 | DDE family transposase                                                       | COG3039 | L    | 1.00 | 5.1E-03 | 1.37 | 1.1E-03 |
| CLV04_1941 | hypothetical protein                                                         |         |      | 1.28 | 1.2E-04 | 1.80 | 1.4E-05 |

|            |                                                                                            |                  |   |      |         |      |         |
|------------|--------------------------------------------------------------------------------------------|------------------|---|------|---------|------|---------|
| CLV04_1942 | MAC/Perforin domain-containing protein                                                     |                  |   | 1.00 | 2.8E-03 | 1.38 | 4.8E-04 |
| CLV04_1946 | hypothetical protein                                                                       |                  |   | 1.20 | 4.8E-04 | 1.23 | 6.8E-04 |
| CLV04_1949 | TetR family transcriptional regulator                                                      |                  | K | 0.67 | 3.1E-03 | 1.15 | 8.3E-05 |
| CLV04_1950 | hypothetical protein                                                                       |                  |   | 1.93 | 8.7E-04 | 3.33 | 2.1E-05 |
| CLV04_1951 | hypothetical protein                                                                       |                  |   | 1.40 | 7.5E-03 | 2.81 | 6.6E-05 |
| CLV04_1957 | allosteric NADP-dependent malic enzyme                                                     | COG0280, COG0281 | C | 1.45 | 7.0E-08 | 0.72 | 1.2E-04 |
| CLV04_2008 | amino acid ABC transporter substrate-binding protein (PAAT family)                         |                  | G | 2.82 | 4.5E-08 | 2.88 | 8.8E-08 |
| CLV04_2015 | hypothetical protein                                                                       |                  |   | 2.08 | 5.4E-04 | 3.27 | 3.3E-05 |
| CLV04_2037 | hypothetical protein                                                                       |                  |   | 2.06 | 8.9E-06 | 2.18 | 1.2E-05 |
| CLV04_2127 | D-mannose binding lectin                                                                   |                  | M | 1.15 | 1.7E-04 | 2.30 | 1.1E-06 |
| CLV04_2128 | hypothetical protein                                                                       |                  |   | 1.12 | 2.1E-03 | 3.00 | 1.9E-06 |
| CLV04_2131 | VCBS repeat-containing protein                                                             |                  | S | 1.78 | 2.5E-06 | 3.06 | 8.2E-08 |
| CLV04_2145 | hypothetical protein                                                                       | COG2910          | S | 1.05 | 5.6E-05 | 1.41 | 9.5E-06 |
| CLV04_2161 | amino acid ABC transporter substrate-binding protein (PAAT family)                         |                  | E | 1.31 | 1.1E-05 | 1.17 | 5.6E-05 |
| CLV04_2163 | 3-hydroxybutyrate dehydrogenase                                                            |                  | C | 0.85 | 1.6E-03 | 1.32 | 7.3E-05 |
| CLV04_2164 | NTE family protein                                                                         | COG1752          | S | 1.57 | 4.8E-05 | 1.39 | 2.7E-04 |
| CLV04_2167 | glutamine--fructose-6-phosphate transaminase                                               | COG0449          | M | 1.55 | 5.1E-05 | 1.17 | 9.1E-04 |
| CLV04_2200 | uncharacterized protein (TIGR04141 family)                                                 |                  |   | 3.39 | 1.9E-07 | 3.77 | 2.2E-07 |
| CLV04_2202 | vioS                                                                                       |                  |   | 4.00 | 5.2E-08 | 2.98 | 2.0E-06 |
| CLV04_2252 | ferritin-like protein                                                                      |                  |   | 1.73 | 3.4E-05 | 1.24 | 7.7E-04 |
| CLV04_2286 | chitin-binding protein                                                                     | COG3397          | G | 3.49 | 1.5E-04 | 2.66 | 1.5E-03 |
| CLV04_2316 | hypothetical protein                                                                       |                  |   | 1.66 | 1.9E-03 | 2.57 | 1.6E-04 |
| CLV04_2396 | hypothetical protein                                                                       |                  |   | 0.80 | 1.1E-03 | 1.36 | 2.8E-05 |
| CLV04_2455 | aspartate carbamoyltransferase                                                             | COG0540          | F | 1.13 | 5.5E-03 | 1.55 | 1.2E-03 |
| CLV04_2474 | phage tail sheath gpL-like                                                                 | COG4386          | S | 4.73 | 1.8E-07 | 4.18 | 9.3E-07 |
| CLV04_2475 | hypothetical protein                                                                       |                  |   | 2.64 | 4.3E-06 | 3.55 | 1.1E-06 |
| CLV04_2476 | hypothetical protein                                                                       |                  |   | 2.59 | 5.8E-05 | 3.47 | 1.5E-05 |
| CLV04_2477 | prophage DNA circulation protein                                                           | COG4228          | L | 2.51 | 5.7E-06 | 2.65 | 8.3E-06 |
| CLV04_2478 | prophage tail gpP-like protein                                                             | COG4379          | S | 2.38 | 1.0E-04 | 1.55 | 2.9E-03 |
| CLV04_2480 | phage gp46-like protein                                                                    | COG4381          | S | 1.74 | 4.1E-05 | 1.36 | 4.8E-04 |
| CLV04_2481 | putative phage protein gp47/JayE                                                           | COG3299          | S | 2.71 | 9.3E-06 | 1.90 | 2.6E-04 |
| CLV04_2482 | uncharacterized protein YmfQ (DUF2313 family)                                              | COG3778          | S | 2.14 | 7.8E-05 | 2.05 | 1.9E-04 |
| CLV04_2483 | short tail fiber-like protein                                                              |                  | S | 3.46 | 2.3E-08 | 3.25 | 8.8E-08 |
| CLV04_2484 | virus tail fiber assembly protein lambda gpK                                               |                  | S | 3.00 | 1.4E-06 | 3.48 | 1.1E-06 |
| CLV04_2485 | hypothetical protein                                                                       |                  | S | 1.51 | 3.0E-05 | 1.75 | 1.6E-05 |
| CLV04_2486 | microcystin-dependent protein                                                              |                  | S | 1.96 | 5.0E-07 | 2.09 | 6.9E-07 |
| CLV04_2520 | glutathione S-transferase                                                                  | COG0625          | O | 1.73 | 1.2E-06 | 1.12 | 1.4E-04 |
| CLV04_2527 | hypothetical protein                                                                       |                  |   | 2.17 | 3.0E-06 | 1.53 | 9.8E-05 |
| CLV04_2671 | glutathione S-transferase                                                                  |                  | O | 0.62 | 2.4E-03 | 0.57 | 6.5E-03 |
| CLV04_2672 | secreted protein                                                                           |                  | S | 0.67 | 2.1E-03 | 0.75 | 1.6E-03 |
| CLV04_2693 | fructose-bisphosphate aldolase                                                             | COG0191          | G | 1.38 | 7.0E-06 | 1.01 | 2.4E-04 |
| CLV04_2708 | L-glutamate ABC transporter membrane protein /L-aspartate ABC transporter membrane protein | COG0765          | E | 1.99 | 1.6E-05 | 1.21 | 1.4E-03 |
| CLV04_2710 | L-glutamate-binding protein /L-aspartate-binding protein                                   | COG0834          | P | 2.23 | 1.3E-07 | 1.85 | 1.7E-06 |
| CLV04_2737 | nucleoside-specific channel-forming protein Tsx                                            |                  | M | 0.53 | 3.7E-03 | 0.77 | 4.0E-04 |
| CLV04_2782 | methyl-accepting chemotaxis sensory transducer with Cache sensor                           | COG0840          | T | 0.73 | 8.5E-04 | 0.62 | 4.2E-03 |
| CLV04_2805 | methyltransferase family protein                                                           |                  | S | 0.98 | 8.1E-03 | 1.20 | 3.8E-03 |
| CLV04_2809 | DNA sulfur modification protein DndD                                                       | COG0419          | L | 1.01 | 5.3E-03 | 1.52 | 5.9E-04 |
| CLV04_2810 | DNA sulfur modification protein DndE                                                       |                  | L | 1.83 | 2.9E-04 | 2.99 | 1.2E-05 |
| CLV04_2811 | hypothetical protein                                                                       |                  |   | 2.37 | 1.3E-04 | 3.94 | 3.0E-06 |
| CLV04_2812 | DndB-like DNA-sulfur modification-associated protein                                       |                  |   | 1.69 | 7.4E-04 | 2.97 | 9.0E-06 |
| CLV04_2813 | restriction system protein                                                                 | COG1715          | V | 1.35 | 4.6E-03 | 2.56 | 6.8E-05 |

|            |                                                                           |                  |   |      |         |      |         |
|------------|---------------------------------------------------------------------------|------------------|---|------|---------|------|---------|
| CLV04_2882 | cell division protein FtsZ                                                | COG0206          | D | 1.36 | 2.2E-07 | 0.90 | 2.6E-05 |
| CLV04_2883 | UDP-3-O-[3-hydroxymyristoyl] N-acetylglucosamine deacetylase              | COG0774          | M | 1.00 | 1.7E-06 | 0.83 | 2.1E-05 |
| CLV04_2907 | hypothetical protein                                                      |                  |   | 2.02 | 1.1E-06 | 3.15 | 5.9E-08 |
| CLV04_2923 | methyl-accepting chemotaxis sensory transducer with Cache sensor          | COG0840          | P | 1.25 | 5.1E-05 | 0.82 | 2.4E-03 |
| CLV04_2968 | starvation-inducible DNA-binding protein                                  | COG0783          | P | 1.67 | 9.5E-05 | 1.21 | 2.1E-03 |
| CLV04_3091 | hypothetical protein                                                      |                  |   | 1.85 | 5.8E-05 | 1.88 | 9.2E-05 |
| CLV04_3131 | hypothetical protein                                                      |                  |   | 1.94 | 3.8E-04 | 1.27 | 8.9E-03 |
| CLV04_3144 | putative spermidine/putrescine transport system substrate-binding protein | COG0687          | G | 0.80 | 6.2E-04 | 0.91 | 3.7E-04 |
| CLV04_3211 | glutamate synthase (NADPH) large subunit                                  | COG0067, COG0069 | E | 2.38 | 2.4E-06 | 1.71 | 8.6E-05 |
| CLV04_3212 | glutamate synthase (NADPH) small subunit                                  | COG0493          | E | 1.90 | 7.3E-06 | 1.61 | 5.6E-05 |
| CLV04_3213 | lipopolysaccharide/colanic/teichoic acid biosynthesis glycosyltransferase | COG2148          | M | 3.42 | 4.2E-07 | 4.88 | 8.8E-08 |
| CLV04_3214 | polysaccharide biosynthesis protein                                       | COG1086          | M | 2.39 | 2.7E-06 | 3.34 | 3.5E-07 |
| CLV04_3215 | uncharacterized protein DUF1792                                           | COG1442          | M | 2.64 | 5.6E-07 | 4.06 | 5.9E-08 |
| CLV04_3216 | GT2 family glycosyltransferase                                            | COG1216          | M | 2.87 | 3.0E-06 | 4.56 | 2.2E-07 |
| CLV04_3217 | O-antigen/teichoic acid export membrane protein                           |                  |   | 3.35 | 4.8E-07 | 4.91 | 8.4E-08 |
| CLV04_3218 | polysaccharide deacetylase                                                | COG0726          | G | 3.01 | 2.4E-06 | 4.75 | 2.2E-07 |
| CLV04_3219 | hypothetical protein                                                      |                  |   | 3.66 | 1.8E-06 | 5.36 | 2.3E-07 |
| CLV04_3220 | hypothetical protein                                                      |                  |   | 3.22 | 1.8E-06 | 4.97 | 1.8E-07 |
| CLV04_3221 | glycosyl transferase-like sugar-binding protein                           | COG3774          | M | 2.80 | 2.6E-05 | 4.28 | 1.4E-06 |
| CLV04_3222 | hypothetical protein                                                      |                  |   | 3.43 | 2.8E-06 | 4.97 | 3.5E-07 |
| CLV04_3223 | nucleoside-diphosphate-sugar epimerase                                    | COG0451          | M | 2.75 | 4.2E-07 | 4.18 | 5.9E-08 |
| CLV04_3224 | glycosyltransferase involved in cell wall biosynthesis                    |                  | M | 3.27 | 1.3E-06 | 4.57 | 2.2E-07 |
| CLV04_3225 | methionyl-tRNA formyltransferase                                          | COG0223          | M | 3.25 | 7.4E-06 | 2.97 | 3.4E-05 |
| CLV04_3226 | hypothetical protein                                                      |                  |   | 1.10 | 4.1E-04 | 0.83 | 4.7E-03 |
| CLV04_3227 | glycosyl transferase family 2                                             | COG0463          | M | 1.03 | 5.3E-06 | 0.45 | 7.5E-03 |
| CLV04_3295 | CobQ/CobB/MinD/ParA family nucleotide binding protein                     |                  | U | 1.11 | 5.6E-03 | 2.08 | 1.4E-04 |
| CLV04_3341 | addiction module HigA family antidote                                     | COG3093          | S | 1.75 | 4.5E-04 | 3.04 | 5.9E-06 |
| CLV04_3342 | proteic killer suppression protein                                        | COG3549          | S | 1.40 | 3.4E-03 | 2.46 | 1.0E-04 |
| CLV04_3343 | integrase                                                                 | COG0582          | L | 0.80 | 3.3E-04 | 1.01 | 8.9E-05 |
| CLV04_3357 | phosphate ABC transporter substrate-binding protein (PhoT family)         | COG0226          | P | 2.24 | 8.4E-06 | 1.44 | 7.4E-04 |
| CLV04_3391 | hypothetical protein                                                      |                  |   | 0.84 | 4.4E-03 | 1.22 | 5.2E-04 |
| CLV04_3449 | hypothetical protein                                                      |                  |   | 1.81 | 3.6E-05 | 3.04 | 1.4E-06 |
| CLV04_3455 | DNA polymerase-3 subunit epsilon                                          | COG0322, COG0847 | L | 0.83 | 8.3E-04 | 0.81 | 1.7E-03 |
| CLV04_3487 | hypothetical protein                                                      |                  |   | 1.31 | 1.2E-03 | 2.43 | 2.0E-05 |
| CLV04_3488 | HTH-type transcriptional regulator/antitoxin HigA                         | COG5499          | K | 1.70 | 6.3E-05 | 3.11 | 1.0E-06 |
| CLV04_3489 | mRNA interferase HigB                                                     | COG4680          | S | 2.23 | 5.4E-05 | 4.22 | 9.3E-07 |
| CLV04_3492 | malate dehydrogenase (NAD)                                                | COG0039          | C | 1.62 | 1.3E-05 | 1.02 | 1.3E-03 |
| CLV04_3576 | aryl-alcohol dehydrogenase-like predicted oxidoreductase                  | COG0667          | C | 1.20 | 8.9E-05 | 0.75 | 6.0E-03 |
| CLV04_3590 | Cd2+/Zn2+-exporting ATPase                                                | COG2217          | P | 1.57 | 1.1E-04 | 1.58 | 1.9E-04 |
| CLV04_3680 | spermidine export protein MdtJ                                            | COG2076          | P | 1.28 | 3.7E-05 | 0.98 | 6.6E-04 |
| CLV04_3686 | hypothetical protein                                                      |                  | S | 1.02 | 1.5E-03 | 1.06 | 1.8E-03 |
| CLV04_3691 | carboxypeptidase Taq                                                      | COG2317          | E | 1.34 | 1.6E-04 | 0.83 | 7.4E-03 |
| CLV04_3763 | phasin family protein                                                     |                  | S | 2.88 | 3.8E-07 | 3.46 | 1.8E-07 |
| CLV04_3772 | glycosyl hydrolase family 101                                             |                  | S | 0.53 | 8.1E-03 | 1.03 | 1.1E-04 |
| CLV04_3788 | serine transporter                                                        | COG0814          | E | 1.96 | 2.7E-05 | 1.61 | 2.4E-04 |
| CLV04_3806 | beta-alanine--pyruvate transaminase                                       | COG0161          | E | 2.21 | 1.2E-07 | 1.67 | 3.3E-06 |
| CLV04_3807 | methylmalonate-semialdehyde dehydrogenase [acylating]                     | COG1012          | I | 2.78 | 8.6E-09 | 2.12 | 2.7E-07 |
| CLV04_3808 | acetyltransferase (GNAT) family protein                                   | COG3153          | S | 1.00 | 2.3E-04 | 1.00 | 4.0E-04 |
| CLV04_3895 | acetate kinase                                                            | COG0282          | C | 1.79 | 1.5E-04 | 1.26 | 3.0E-03 |
| CLV04_3908 | amino acid/amide ABC transporter substrate-binding protein (HAAT family)  | COG0683          | E | 2.66 | 2.2E-10 | 1.36 | 5.9E-07 |
| CLV04_3922 | hypothetical protein                                                      |                  |   | 0.70 | 6.0E-03 | 1.47 | 4.4E-05 |

|                                                                              |                                                                                      |         |   |      |         |      |         |
|------------------------------------------------------------------------------|--------------------------------------------------------------------------------------|---------|---|------|---------|------|---------|
| CLV04_4020                                                                   | isocitrate lyase                                                                     | COG2224 | C | 2.08 | 2.6E-06 | 1.62 | 6.0E-05 |
| CLV04_4028                                                                   | hypothetical protein                                                                 |         |   | 1.59 | 2.5E-03 | 3.31 | 3.5E-05 |
| CLV04_4045                                                                   | hypothetical protein                                                                 | COG3417 | S | 1.33 | 1.1E-03 | 1.78 | 2.4E-04 |
| CLV04_4081                                                                   | flagellar basal-body rod protein FlgB                                                | COG1815 | N | 1.44 | 1.3E-03 | 2.91 | 1.5E-05 |
| CLV04_4088                                                                   | flagellar P-ring protein precursor FlgI                                              | COG1706 | N | 1.90 | 1.4E-05 | 1.93 | 2.3E-05 |
| CLV04_4168                                                                   | putative serine protein kinase PrkA                                                  | COG2766 | T | 2.41 | 3.4E-07 | 2.06 | 3.5E-06 |
| CLV04_4169                                                                   | hypothetical protein                                                                 | COG2718 | S | 1.61 | 8.4E-05 | 1.58 | 1.8E-04 |
| CLV04_4170                                                                   | stage V sporulation protein R                                                        | COG2719 | S | 1.86 | 1.4E-06 | 1.37 | 5.6E-05 |
| CLV04_4181                                                                   | 3-hydroxypropanoate dehydrogenase                                                    | COG0778 | C | 1.21 | 1.2E-06 | 0.78 | 1.3E-04 |
| CLV04_4236                                                                   | 4-hydroxy-tetrahydrodipicolinate synthase                                            | COG0329 | E | 1.94 | 3.4E-05 | 1.03 | 5.2E-03 |
| CLV04_4256                                                                   | nicotinamidase-related amidase                                                       | COG1335 | Q | 1.57 | 6.1E-05 | 1.43 | 2.4E-04 |
| CLV04_4266                                                                   | methyl-accepting chemotaxis sensory transducer with Pas/Pac sensor                   |         | T | 2.53 | 9.1E-07 | 1.13 | 1.2E-03 |
| CLV04_4309                                                                   | putrescine transport system substrate-binding protein                                | COG0687 | G | 2.72 | 7.8E-09 | 1.84 | 8.2E-07 |
| CLV04_4310                                                                   | putrescine transport system permease protein                                         | COG1176 | P | 2.29 | 3.6E-07 | 1.41 | 4.6E-05 |
| CLV04_4311                                                                   | putrescine transport system permease protein                                         | COG1177 | P | 2.34 | 7.3E-08 | 1.46 | 8.3E-06 |
| CLV04_4312                                                                   | uncharacterized protein DUF3138                                                      |         | S | 5.01 | 1.2E-10 | 3.39 | 4.5E-08 |
| CLV04_4319                                                                   | iron complex outermembrane receptor protein                                          |         | P | 0.64 | 4.7E-03 | 0.70 | 4.1E-03 |
| CLV04_4331                                                                   | iron complex outermembrane receptor protein                                          |         | P | 2.54 | 2.3E-06 | 1.45 | 7.9E-04 |
| CLV04_4337                                                                   | deoxyribonuclease-1                                                                  | COG2356 | L | 1.06 | 2.6E-03 | 0.95 | 8.4E-03 |
| CLV04_4341                                                                   | arginine decarboxylase                                                               | COG1982 | E | 1.83 | 3.6E-07 | 0.76 | 2.1E-03 |
| Genes downregulated by translation inhibition modulated by <i>air</i> system |                                                                                      |         |   |      |         |      |         |
| CLV04_0005                                                                   | hypothetical protein                                                                 |         |   | 1.78 | 1.3E-04 | 1.86 | 1.7E-04 |
| CLV04_0010                                                                   | EAL domain-containing protein (putative c-di-GMP-specific phosphodiesterase class I) | COG2200 | T | 0.85 | 1.1E-03 | 0.67 | 8.3E-03 |
| CLV04_0012                                                                   | type 4 prepilin peptidase 1                                                          | COG1989 | O | 1.35 | 1.2E-04 | 1.70 | 3.5E-05 |
| CLV04_0013                                                                   | hypothetical protein                                                                 |         |   | 1.47 | 1.2E-04 | 1.10 | 1.7E-03 |
| CLV04_0062                                                                   | alcohol dehydrogenase                                                                | COG1454 | C | 2.63 | 2.1E-03 | 2.32 | 7.8E-03 |
| CLV04_0330                                                                   | L-lysine exporter family protein LysE/ArgO                                           | COG1279 | E | 1.43 | 6.9E-05 | 1.48 | 1.0E-04 |
| CLV04_0508                                                                   | hypothetical protein                                                                 |         |   | 2.01 | 1.1E-05 | 1.36 | 4.1E-04 |
| CLV04_0571                                                                   | single-strand binding protein                                                        | COG0629 | L | 2.56 | 2.7E-05 | 1.80 | 5.8E-04 |
| CLV04_0794                                                                   | hypothetical protein                                                                 | COG0438 | M | 1.06 | 4.2E-03 | 1.15 | 4.0E-03 |
| CLV04_0827                                                                   | succinylglutamate desuccinylase                                                      | COG2988 | E | 1.01 | 4.1E-04 | 0.72 | 6.7E-03 |
| CLV04_0942                                                                   | chemotaxis protein MotB                                                              | COG1360 | N | 0.92 | 6.8E-04 | 0.89 | 1.4E-03 |
| CLV04_0944                                                                   | RNA polymerase sigma-28 (SigD/FliA/WhiG) subunit                                     | COG1191 | K | 1.80 | 5.5E-04 | 2.62 | 7.5E-05 |
| CLV04_0949                                                                   | flagellar hook-associated protein 2                                                  | COG1345 | N | 2.35 | 3.6E-07 | 3.37 | 6.5E-08 |
| CLV04_0957                                                                   | flagellar motor switch protein FliN/FliY                                             | COG1886 | N | 1.24 | 1.4E-03 | 1.69 | 2.8E-04 |
| CLV04_1181                                                                   | undecaprenyl-diphosphatase                                                           | COG3038 | C | 0.83 | 1.4E-03 | 0.79 | 3.1E-03 |
| CLV04_1182                                                                   | cytochrome b561                                                                      |         | S | 0.84 | 5.3E-04 | 0.65 | 5.1E-03 |
| CLV04_1368                                                                   | diguanylate cyclase/phosphodiesterase                                                |         | T | 1.37 | 2.5E-05 | 1.00 | 5.6E-04 |
| CLV04_1441                                                                   | patatin-like phospholipase                                                           |         |   | 1.02 | 4.4E-05 | 0.57 | 5.9E-03 |
| CLV04_1552                                                                   | methionine synthase (B12-independent)                                                | COG0620 | E | 1.12 | 6.4E-04 | 0.81 | 8.8E-03 |
| CLV04_1696                                                                   | POT family proton-dependent oligopeptide transporter                                 | COG3104 | E | 1.60 | 4.9E-06 | 0.64 | 9.5E-03 |
| CLV04_1836                                                                   | flagellar hook-length control protein FliK                                           |         | S | 0.54 | 3.3E-03 | 0.50 | 8.8E-03 |
| CLV04_1947                                                                   | Mu transposase-like protein                                                          |         | L | 0.55 | 7.6E-03 | 0.63 | 5.7E-03 |
| CLV04_2053                                                                   | heptosyltransferase-3                                                                | COG0859 | M | 0.66 | 3.8E-03 | 0.69 | 4.5E-03 |
| CLV04_2068                                                                   | amino acid ABC transporter substrate-binding protein (PAAT family)                   | COG0834 | E | 0.60 | 7.4E-03 | 0.66 | 6.6E-03 |
| CLV04_2137                                                                   | poly(3-hydroxybutyrate) depolymerase                                                 |         | S | 1.23 | 4.2E-04 | 1.09 | 1.7E-03 |
| CLV04_2165                                                                   | amino acid ABC transporter substrate-binding protein (PAAT family)                   |         | E | 0.83 | 6.9E-04 | 0.71 | 3.5E-03 |
| CLV04_2168                                                                   | DeoR family transcriptional regulator                                                | COG1349 | K | 1.32 | 2.7E-03 | 1.48 | 2.0E-03 |
| CLV04_2195                                                                   | IS4 family transposase                                                               | COG3039 | L | 0.81 | 9.0E-03 | 0.96 | 5.2E-03 |
| CLV04_2467                                                                   | Mor transcription activator family protein                                           |         | S | 1.93 | 1.8E-05 | 1.52 | 2.2E-04 |
| CLV04_2468                                                                   | peptidoglycan L-alanyl-D-glutamate endopeptidase CwlK                                |         | M | 1.46 | 9.7E-05 | 1.48 | 1.6E-04 |

|                                                    |                                                                        |                  |   |       |         |       |         |
|----------------------------------------------------|------------------------------------------------------------------------|------------------|---|-------|---------|-------|---------|
| CLV04_2469                                         | hypothetical protein                                                   |                  |   | 1.45  | 8.0E-03 | 1.68  | 5.9E-03 |
| CLV04_2470                                         | hypothetical protein                                                   |                  |   | 1.14  | 2.5E-03 | 1.18  | 3.3E-03 |
| CLV04_2473                                         | phage gp37-like protein                                                |                  | S | 2.10  | 2.4E-04 | 1.92  | 8.0E-04 |
| CLV04_2479                                         | phage baseplate assembly protein V                                     | COG4384          | S | 1.18  | 4.5E-03 | 1.12  | 9.3E-03 |
| CLV04_3199                                         | long-chain acyl-CoA synthetase                                         | COG1022          | I | 0.86  | 9.4E-04 | 0.80  | 2.4E-03 |
| CLV04_3591                                         | SprA family protein                                                    |                  | S | 1.42  | 3.1E-05 | 1.06  | 5.9E-04 |
| CLV04_3679                                         | spermidine export protein MdtI                                         | COG2076          | P | 0.69  | 4.9E-03 | 0.95  | 9.3E-04 |
| CLV04_3894                                         | phosphotransacetylase                                                  | COG0280, COG0857 | C | 1.59  | 2.5E-04 | 1.11  | 5.0E-03 |
| CLV04_4047                                         | hypothetical protein                                                   | COG3014          | S | 1.73  | 4.1E-05 | 1.50  | 2.4E-04 |
| CLV04_4083                                         | flagellar basal-body rod modification protein FlgD                     | COG1843          | N | 1.32  | 2.3E-04 | 2.07  | 1.1E-05 |
| CLV04_4084                                         | flagellar hook protein FlgE                                            | COG1749          | N | 1.96  | 1.1E-05 | 2.50  | 2.6E-06 |
| CLV04_4085                                         | flagellar basal-body rod protein FlgF                                  | COG4787          | N | 2.47  | 5.8E-07 | 2.56  | 1.0E-06 |
| CLV04_4086                                         | flagellar basal-body rod protein FlgG                                  | COG4786          | N | 1.89  | 1.1E-05 | 2.67  | 1.4E-06 |
| CLV04_4087                                         | flagellar L-ring protein precursor FlgH                                | COG2063          | N | 2.30  | 5.0E-06 | 2.96  | 1.4E-06 |
| CLV04_4089                                         | flagellar protein FlgJ                                                 |                  |   | 1.85  | 1.4E-04 | 2.19  | 7.4E-05 |
| CLV04_4090                                         | flagellar hook-associated protein 1 FlgK                               | COG1256          | N | 1.05  | 2.3E-03 | 2.90  | 1.4E-06 |
| CLV04_4091                                         | flagellar hook-associated protein 3 FlgL                               | COG1344          | N | 0.85  | 8.7E-03 | 3.00  | 1.3E-06 |
| CLV04_4092                                         | hypothetical protein                                                   |                  |   | 1.75  | 1.1E-05 | 2.94  | 3.5E-07 |
| CLV04_4268                                         | S-PFT family hemolysin                                                 | COG3210          | U | 0.84  | 2.9E-04 | 0.75  | 1.2E-03 |
| CLV04_4281                                         | hypothetical protein                                                   |                  |   | 1.18  | 1.9E-04 | 0.79  | 6.0E-03 |
| CLV04_4420                                         | diguanylate cyclase (GGDEF)-like protein                               |                  | T | 1.18  | 4.8E-05 | 0.72  | 3.6E-03 |
| <b>Genes upregulated by translation inhibition</b> |                                                                        |                  |   |       |         |       |         |
| CLV04_0034                                         | ring-1,2-phenylacetyl-CoA epoxidase subunit PaaA                       | COG3396          | Q | -1.67 | 3.5E-05 | -1.73 | 4.4E-05 |
| CLV04_0035                                         | uncharacterized protein (TIGR00369 family)                             |                  | Q | -1.20 | 1.1E-03 | -1.69 | 8.5E-05 |
| CLV04_0049                                         | GST-like protein                                                       | COG0625          | O | -0.52 | 2.0E-03 | -0.52 | 3.4E-03 |
| CLV04_0117                                         | putative PurR-regulated permease PerM                                  | COG0628          | S | -0.67 | 6.9E-03 | -0.91 | 1.3E-03 |
| CLV04_0128                                         | FKBP-type peptidyl-prolyl cis-trans isomerase FkpA                     | COG0545          | O | -2.08 | 4.9E-08 | -0.79 | 8.6E-04 |
| CLV04_0149                                         | hypothetical protein                                                   |                  |   | -2.99 | 3.1E-07 | -2.24 | 1.1E-05 |
| CLV04_0157                                         | 6,7-dimethyl-8-ribityllumazine synthase                                | COG0054          | H | -0.88 | 3.2E-04 | -0.81 | 1.1E-03 |
| CLV04_0158                                         | NusB antitermination factor                                            | COG0781          | K | -2.88 | 1.2E-08 | -1.79 | 3.6E-06 |
| CLV04_0176                                         | hypothetical protein                                                   |                  |   | -1.18 | 1.6E-03 | -2.13 | 1.2E-05 |
| CLV04_0190                                         | uncharacterized protein DUF1843                                        |                  | S | -0.85 | 9.1E-03 | -2.96 | 2.3E-07 |
| CLV04_0191                                         | uncharacterized protein DUF1843                                        |                  |   | -1.56 | 1.7E-03 | -2.98 | 6.5E-06 |
| CLV04_0197                                         | type III secretion system major needle protein (YscF/MxiH/PrgI family) |                  | U | -1.98 | 4.2E-06 | -2.79 | 3.5E-07 |
| CLV04_0200                                         | DNA-binding winged helix-turn-helix (wHTH) protein                     | COG0457          | K | -0.63 | 5.9E-03 | -0.70 | 5.1E-03 |
| CLV04_0208                                         | invasion protein B family protein                                      |                  | U | -1.38 | 3.9E-05 | -1.52 | 2.8E-05 |
| CLV04_0211                                         | surface presentation of antigens protein                               |                  | S | -0.86 | 2.4E-03 | -1.59 | 2.2E-05 |
| CLV04_0212                                         | type III secretion system apparatus protein YscQ/HrcQ                  | COG1886          | U | -0.93 | 8.5E-04 | -1.62 | 1.1E-05 |
| CLV04_0213                                         | type III secretion protein R                                           | COG4790          | U | -1.21 | 1.6E-04 | -1.59 | 2.1E-05 |
| CLV04_0214                                         | type III secretion protein S                                           | COG4794          | U | -1.55 | 2.5E-05 | -1.36 | 1.6E-04 |
| CLV04_0215                                         | type III secretion protein T                                           | COG4791          | U | -1.61 | 2.6E-04 | -1.38 | 1.6E-03 |
| CLV04_0216                                         | type III secretion protein U                                           | COG1377          | N | -1.65 | 1.5E-04 | -1.16 | 4.9E-03 |
| CLV04_0217                                         | type III secretion system low calcium response chaperone LcrH/SycD     | COG0457          | S | -1.85 | 1.4E-06 | -1.27 | 1.0E-04 |
| CLV04_0218                                         | type III secretion system translocon protein (YopB/IpaB/SipB family)   |                  | D | -0.46 | 9.3E-03 | -1.00 | 4.3E-05 |
| CLV04_0226                                         | AraC family two component transcriptional regulator                    |                  | T | -2.47 | 1.6E-05 | -2.50 | 2.7E-05 |
| CLV04_0234                                         | hypothetical protein                                                   |                  |   | -1.35 | 1.8E-04 | -1.10 | 1.7E-03 |
| CLV04_0261                                         | hypothetical protein                                                   |                  |   | -1.72 | 1.9E-06 | -1.28 | 7.0E-05 |
| CLV04_0270                                         | D-fructose 1,6-bisphosphatase                                          | COG0158          | G | -0.68 | 3.7E-03 | -0.82 | 1.5E-03 |
| CLV04_0320                                         | ATP-dependent Clp protease ATP-binding subunit ClpX                    | COG1219          | O | -1.39 | 7.8E-06 | -0.81 | 1.6E-03 |
| CLV04_0321                                         | ATP-dependent Clp protease proteolytic subunit ClpP                    | COG0740          | O | -1.18 | 6.6E-06 | -0.85 | 2.6E-04 |
| CLV04_0322                                         | trigger factor                                                         | COG0544          | O | -1.19 | 1.9E-04 | -1.02 | 1.1E-03 |

|            |                                                                                                      |                  |      |       |         |       |         |
|------------|------------------------------------------------------------------------------------------------------|------------------|------|-------|---------|-------|---------|
| CLV04_0352 | 1-deoxy-D-xylulose 5-phosphate reductoisomerase                                                      | COG0743          | I    | -0.57 | 9.0E-03 | -0.62 | 9.0E-03 |
| CLV04_0424 | type VI secretion system secreted protein VgrG                                                       | COG4253          | S    | -1.35 | 6.4E-06 | -0.98 | 2.5E-04 |
| CLV04_0437 | hypothetical protein                                                                                 |                  |      | -0.67 | 6.4E-03 | -1.05 | 3.5E-04 |
| CLV04_0462 | hypothetical protein                                                                                 |                  |      | -4.44 | 1.9E-08 | -4.48 | 5.9E-08 |
| CLV04_0480 | indole-3-glycerol phosphate synthase                                                                 | COG0134          | E    | -1.40 | 2.5E-06 | -0.92 | 2.6E-04 |
| CLV04_0561 | hypothetical protein                                                                                 |                  |      | -2.08 | 3.4E-05 | -1.15 | 6.9E-03 |
| CLV04_0594 | molecular chaperone Hsp33                                                                            | COG1281          | O    | -1.67 | 3.5E-07 | -1.01 | 9.6E-05 |
| CLV04_0616 | AraC-like protein                                                                                    |                  | S    | -2.23 | 9.5E-06 | -2.71 | 2.5E-06 |
| CLV04_0617 | hypothetical protein                                                                                 | COG0442          | J    | -1.42 | 3.9E-03 | -1.71 | 1.5E-03 |
| CLV04_0618 | GTP cyclohydrolase II                                                                                | COG0807          | H    | -1.54 | 2.2E-05 | -2.07 | 2.0E-06 |
| CLV04_0620 | phenylacetate-CoA ligase                                                                             | COG0463, COG1541 | Q    | -1.21 | 4.8E-04 | -1.81 | 2.0E-05 |
| CLV04_0622 | 4-hydroxy-2-oxoheptanedioate aldolase                                                                | COG3836          | G    | -2.45 | 5.3E-07 | -2.95 | 1.9E-07 |
| CLV04_0623 | uncharacterized protein (DUF697 family)                                                              |                  | S    | -3.04 | 8.0E-07 | -3.46 | 4.8E-07 |
| CLV04_0624 | hypothetical protein                                                                                 |                  |      | -1.55 | 4.4E-05 | -1.71 | 3.4E-05 |
| CLV04_0626 | putative ATP-binding cassette transporter                                                            | COG4615          | V    | -1.64 | 1.5E-06 | -1.77 | 1.4E-06 |
| CLV04_0627 | regulator of protease activity HflC (stomatin/prohibitin superfamily)                                | COG0330          | O    | -1.72 | 5.8E-06 | -1.78 | 9.0E-06 |
| CLV04_0628 | condensation domain-containing protein                                                               | COG0318, COG1020 | Q    | -1.67 | 9.0E-06 | -1.48 | 5.8E-05 |
| CLV04_0629 | hypothetical protein                                                                                 |                  |      | -2.29 | 9.1E-04 | -1.93 | 5.7E-03 |
| CLV04_0651 | ubiquinone/menaquinone biosynthesis C-methylase UbiE                                                 | COG0500          | Q    | -2.71 | 2.8E-07 | -3.11 | 1.8E-07 |
| CLV04_0653 | amino acid adenylation domain-containing protein                                                     | COG3321          | Q    | -5.11 | 2.6E-08 | -5.86 | 4.5E-08 |
| CLV04_0654 | amino acid adenylation domain-containing protein                                                     | COG0318, COG1020 | Q    | -4.44 | 1.8E-07 | -5.45 | 7.3E-08 |
| CLV04_0662 | hypothetical protein                                                                                 |                  |      | -1.21 | 3.6E-03 | -1.60 | 7.3E-04 |
| CLV04_0685 | uncharacterized protein YndB with AHS1/START domain                                                  | COG3832          | S    | -1.24 | 9.5E-05 | -1.05 | 7.7E-04 |
| CLV04_0702 | amino acid adenylation domain-containing protein                                                     | COG0318          | Q    | -3.44 | 2.4E-07 | -1.69 | 6.7E-04 |
| CLV04_0703 | hypothetical protein                                                                                 | COG1960          | I    | -3.03 | 3.3E-07 | -1.50 | 5.4E-04 |
| CLV04_0710 | hypothetical protein                                                                                 |                  |      | -0.75 | 9.8E-03 | -0.89 | 5.2E-03 |
| CLV04_0741 | thioredoxin-like protein                                                                             |                  | O    | -1.37 | 3.9E-05 | -1.44 | 4.6E-05 |
| CLV04_0746 | acetyl-CoA carboxylase carboxyltransferase subunit alpha                                             | COG0777          | I    | -1.34 | 1.1E-06 | -0.83 | 2.1E-04 |
| CLV04_0748 | tryptophan synthase beta chain                                                                       | COG0133          | E    | -0.76 | 2.3E-04 | -0.61 | 2.2E-03 |
| CLV04_0820 | hypothetical protein                                                                                 | COG3631          | S    | -1.35 | 1.1E-03 | -1.85 | 1.2E-04 |
| CLV04_0844 | beta-glucosidase (glycosyl hydrolase family 9)                                                       |                  | S    | -0.62 | 3.4E-03 | -0.71 | 2.0E-03 |
| CLV04_0845 | putative NBD/HSP70 family sugar kinase                                                               | COG1940          | K    | -1.41 | 6.9E-05 | -0.92 | 4.5E-03 |
| CLV04_0879 | intracellular septation protein                                                                      | COG2917          | D    | -1.05 | 2.3E-04 | -0.72 | 6.5E-03 |
| CLV04_0882 | peptidyl-prolyl cis-trans isomerase C                                                                | COG0760          | O    | -1.24 | 1.1E-05 | -0.66 | 3.7E-03 |
| CLV04_0884 | peptidyl-prolyl cis-trans isomerase C                                                                | COG0760          | O    | -1.09 | 1.1E-04 | -1.07 | 2.4E-04 |
| CLV04_0886 | peptidase S41-like protein                                                                           |                  | S    | -2.06 | 7.7E-06 | -1.41 | 5.6E-04 |
| CLV04_0917 | hypothetical protein                                                                                 | COG4378          | S    | -1.16 | 9.7E-03 | -2.19 | 9.8E-05 |
| CLV04_0990 | D-alpha,beta-D-heptose 7-phosphate 1-kinase                                                          | COG2870          | H    | -0.81 | 3.9E-05 | -0.52 | 2.7E-03 |
| CLV04_0991 | UDP-glucose dehydrogenase                                                                            | COG1004          | M    | -0.77 | 2.4E-04 | -0.56 | 4.7E-03 |
| CLV04_0996 | SSU ribosomal protein S1P                                                                            | COG0539          | J    | -0.97 | 8.2E-03 | -1.16 | 4.0E-03 |
| CLV04_1023 | flavin reductase (DIM6/NTAB) family NADH-FMN oxidoreductase RutF                                     | COG1853          | S    | -1.32 | 4.2E-06 | -1.00 | 1.3E-04 |
| CLV04_1028 | hypothetical protein                                                                                 |                  |      | -1.73 | 9.6E-06 | -2.65 | 3.4E-07 |
| CLV04_1071 | thiol:disulfide interchange protein DsbC                                                             | COG1651          | O    | -2.26 | 5.6E-08 | -0.70 | 3.6E-03 |
| CLV04_1128 | peptidylprolyl isomerase/peptidyl-prolyl cis-trans isomerase A (cyclophilin A)/peptidyl-prolyl cis-t | COG0652          | O    | -1.94 | 1.8E-07 | -0.70 | 4.6E-03 |
| CLV04_1153 | thiol:disulfide interchange protein DsbB                                                             | COG1495          | O    | -1.67 | 1.8E-07 | -0.91 | 1.4E-04 |
| CLV04_1195 | DNA-binding CsgD family transcriptional regulator                                                    |                  | S    | -2.54 | 1.5E-05 | -1.24 | 8.3E-03 |
| CLV04_1196 | transaldolase                                                                                        | COG0176          | G    | -2.04 | 9.3E-06 | -1.84 | 5.1E-05 |
| CLV04_1197 | FHS family L-fucose permease-like MFS transporter                                                    | COG0738          | G    | -1.67 | 4.2E-05 | -1.97 | 1.7E-05 |
| CLV04_1207 | putative cold-shock DNA-binding protein                                                              | COG1278          | K    | -4.93 | 4.4E-06 | -2.32 | 6.6E-03 |
| CLV04_1208 | ribosomal protein S18 acetylase RimI-like enzyme                                                     | COG0454          | K    | -2.06 | 4.0E-05 | -2.25 | 3.1E-05 |
| CLV04_1209 | O-acetylserine/cysteine efflux transporter                                                           | COG0697          | E, G | -3.03 | 7.3E-07 | -3.32 | 6.5E-07 |

|            |                                                                                  |                  |   |       |         |       |         |
|------------|----------------------------------------------------------------------------------|------------------|---|-------|---------|-------|---------|
| CLV04_1210 | ornithine--oxo-acid transaminase/hypothetical protein                            | COG4992          | E | -1.56 | 2.7E-04 | -2.65 | 2.3E-06 |
| CLV04_1211 | hypothetical protein                                                             |                  |   | -2.24 | 1.3E-06 | -3.03 | 1.6E-07 |
| CLV04_1212 | heme oxygenase-like protein                                                      |                  |   | -2.58 | 1.4E-07 | -3.18 | 5.9E-08 |
| CLV04_1213 | TENA/THI-4/PQQC family protein                                                   |                  | S | -3.07 | 4.4E-08 | -3.41 | 5.9E-08 |
| CLV04_1223 | polyisoprenoid-binding protein Ycel                                              | COG2353          | S | -3.96 | 5.8E-11 | -0.81 | 9.2E-04 |
| CLV04_1256 | regulator of protease activity HfIC (stomatin/prohibitin superfamily)            | COG0330          | O | -1.12 | 2.9E-04 | -0.90 | 2.9E-03 |
| CLV04_1264 | hypothetical protein                                                             |                  |   | -1.47 | 3.5E-05 | -0.96 | 2.6E-03 |
| CLV04_1289 | biopolymer transport protein ExbB                                                | COG0811          | U | -1.03 | 1.8E-06 | -0.50 | 2.3E-03 |
| CLV04_1296 | Fe-S cluster biosynthesis and repair protein YggX                                | COG2924          | P | -1.92 | 1.2E-07 | -0.65 | 3.8E-03 |
| CLV04_1299 | FAD-dependent sensor of blue light                                               |                  | S | -1.23 | 3.6E-05 | -0.70 | 6.6E-03 |
| CLV04_1311 | ubiquinone biosynthesis monooxygenase Coq7                                       | COG2941          | H | -1.07 | 2.8E-04 | -0.84 | 3.5E-03 |
| CLV04_1324 | hypothetical protein                                                             | COG0339          | E | -2.02 | 2.0E-07 | -1.56 | 5.9E-06 |
| CLV04_1325 | DNA-binding MarR family transcriptional regulator                                |                  | K | -2.62 | 8.8E-07 | -1.31 | 1.2E-03 |
| CLV04_1334 | enamine deaminase RidA (YjgF/YER057c/UK114 family)                               | COG0251          | J | -1.40 | 2.8E-05 | -1.20 | 2.1E-04 |
| CLV04_1338 | stearoyl-CoA desaturase (delta-9 desaturase)                                     | COG1398          | I | -0.93 | 8.7E-06 | -0.55 | 1.5E-03 |
| CLV04_1353 | 3-oxoacyl-[acyl-carrier-protein] synthase II                                     | COG0304          | I | -1.73 | 8.8E-07 | -0.90 | 7.0E-04 |
| CLV04_1355 | 3-oxoacyl-[acyl-carrier-protein] reductase                                       |                  | I | -1.45 | 7.2E-07 | -0.78 | 5.2E-04 |
| CLV04_1356 | [acyl-carrier-protein] S-malonyltransferase                                      | COG0331          | I | -1.15 | 8.7E-07 | -0.69 | 2.1E-04 |
| CLV04_1434 | chitin binding protein                                                           | COG3397, COG3979 | G | -1.03 | 6.0E-03 | -1.10 | 6.0E-03 |
| CLV04_1488 | GTP-binding protein HflX                                                         | COG2262          | S | -0.85 | 5.4E-05 | -0.50 | 6.0E-03 |
| CLV04_1498 | nucleoside diphosphate kinase                                                    | COG0105          | F | -1.43 | 1.8E-07 | -0.93 | 2.4E-05 |
| CLV04_1518 | cysteine synthase                                                                | COG0031          | E | -0.92 | 6.6E-05 | -0.58 | 4.6E-03 |
| CLV04_1523 | 4-hydroxy-3-methylbut-2-enyl diphosphate reductase                               | COG0761          | I | -1.41 | 2.4E-07 | -0.47 | 7.4E-03 |
| CLV04_1585 | LSU ribosomal protein L9P                                                        | COG0359          | J | -3.85 | 3.9E-09 | -1.34 | 2.0E-04 |
| CLV04_1586 | SSU ribosomal protein S18P                                                       | COG0238          | J | -3.65 | 2.3E-08 | -1.01 | 5.5E-03 |
| CLV04_1588 | SSU ribosomal protein S6P                                                        | COG0360          | J | -2.41 | 1.5E-07 | -0.89 | 2.1E-03 |
| CLV04_1619 | LSU ribosomal protein L19P                                                       | COG0335          | J | -2.08 | 4.5E-07 | -1.36 | 5.6E-05 |
| CLV04_1620 | tRNA (guanine37-N(1)-) methyltransferase                                         | COG0336          | J | -1.26 | 6.2E-05 | -0.78 | 4.8E-03 |
| CLV04_1622 | SSU ribosomal protein S16P                                                       | COG0228          | J | -1.45 | 1.7E-06 | -0.70 | 2.0E-03 |
| CLV04_1640 | iron-sulfur cluster insertion protein                                            | COG0316          | C | -2.08 | 1.9E-08 | -0.84 | 2.1E-04 |
| CLV04_1642 | SSU ribosomal protein S9P                                                        | COG0103          | J | -3.43 | 1.5E-09 | -1.50 | 1.1E-05 |
| CLV04_1643 | LSU ribosomal protein L13P                                                       | COG0102          | J | -2.25 | 3.6E-07 | -1.10 | 5.1E-04 |
| CLV04_1734 | hypothetical protein                                                             | COG1610          | S | -2.18 | 4.1E-07 | -1.19 | 3.3E-04 |
| CLV04_1754 | CDP-4-dehydro-6-deoxyglucose reductase                                           | COG0543          | C | -1.85 | 2.3E-07 | -0.79 | 1.3E-03 |
| CLV04_1771 | uncharacterized protein DUF4149                                                  |                  |   | -3.06 | 2.0E-09 | -1.22 | 6.7E-05 |
| CLV04_1772 | transcription elongation factor GreA                                             | COG0782          | K | -2.74 | 3.0E-08 | -1.25 | 1.4E-04 |
| CLV04_1777 | type II secretion system protein M (GspM)                                        | COG3149          | U | -0.97 | 4.1E-04 | -0.92 | 1.2E-03 |
| CLV04_1782 | general secretion pathway protein H                                              | COG2165          | U | -1.15 | 1.7E-04 | -0.80 | 5.1E-03 |
| CLV04_1783 | type II secretion system protein G (GspG)                                        | COG2165          | U | -1.25 | 9.0E-05 | -1.00 | 1.1E-03 |
| CLV04_1787 | type II secretion system protein D (GspD)                                        | COG1450          | U | -0.79 | 2.4E-04 | -0.76 | 5.4E-04 |
| CLV04_1788 | type II secretion system (T2SS) protein C                                        |                  |   | -0.94 | 7.0E-05 | -0.54 | 9.2E-03 |
| CLV04_1802 | putative porin                                                                   |                  | M | -1.74 | 1.1E-05 | -2.37 | 1.2E-06 |
| CLV04_1803 | competence protein ComEA                                                         | COG1555          | L | -1.98 | 1.2E-06 | -2.09 | 1.5E-06 |
| CLV04_1823 | uncharacterized protein (TIGR00255 family)                                       | COG1561          | S | -0.93 | 3.2E-05 | -0.52 | 5.4E-03 |
| CLV04_1869 | DNA-binding MarR family transcriptional regulator                                |                  | K | -2.90 | 8.6E-05 | -3.21 | 6.3E-05 |
| CLV04_1870 | TonB family protein                                                              | COG0810          | M | -2.16 | 5.7E-03 | -3.03 | 6.2E-04 |
| CLV04_1908 | ferritin-like protein                                                            |                  |   | -0.62 | 5.8E-03 | -0.96 | 3.5E-04 |
| CLV04_1960 | flavin reductase (DIM6/NTAB) family NADH-FMN oxidoreductase RutF                 | COG1853          | S | -1.25 | 8.5E-06 | -0.76 | 1.3E-03 |
| CLV04_1989 | carbonic anhydrase/acetyltransferase-like protein (isoleucine patch superfamily) | COG0663          | S | -1.36 | 4.4E-05 | -0.81 | 5.5E-03 |
| CLV04_2010 | LSU ribosomal protein L27P                                                       | COG0211          | J | -2.69 | 4.9E-08 | -0.82 | 4.2E-03 |
| CLV04_2032 | beta-hydroxylase                                                                 | COG3555          | O | -0.93 | 5.4E-05 | -1.17 | 1.2E-05 |

|            |                                                                                                 |                  |      |       |         |       |         |
|------------|-------------------------------------------------------------------------------------------------|------------------|------|-------|---------|-------|---------|
| CLV04_2064 | hypothetical protein                                                                            | COG3470          | P    | -1.10 | 5.9E-03 | -1.24 | 4.4E-03 |
| CLV04_2065 | Cupredoxin-like domain-containing protein                                                       |                  | S    | -1.46 | 1.5E-04 | -1.05 | 3.7E-03 |
| CLV04_2066 | high-affinity iron transporter                                                                  | COG0672          | P    | -1.32 | 2.3E-04 | -1.08 | 1.9E-03 |
| CLV04_2080 | type IV pilus assembly protein PilX                                                             |                  |      | -2.09 | 1.9E-04 | -2.08 | 3.6E-04 |
| CLV04_2081 | hypothetical protein                                                                            |                  |      | -3.23 | 4.1E-06 | -3.26 | 8.2E-06 |
| CLV04_2082 | hypothetical protein                                                                            |                  | U    | -2.65 | 4.1E-04 | -2.83 | 4.0E-04 |
| CLV04_2083 | pilin/secretion family protein with methylation motif                                           | COG4970          | U    | -4.07 | 1.8E-07 | -3.71 | 1.1E-06 |
| CLV04_2093 | arsenate reductase                                                                              | COG1393          | P    | -0.88 | 4.2E-04 | -0.71 | 3.7E-03 |
| CLV04_2111 | undecaprenyl-phosphate 4-deoxy-4-formamido-L-arabinose transferase                              | COG0463          | M    | -0.47 | 5.6E-03 | -0.47 | 9.1E-03 |
| CLV04_2151 | TetR family transcriptional regulator                                                           |                  | K    | -0.70 | 6.5E-03 | -1.34 | 5.6E-05 |
| CLV04_2175 | ATP synthase F1 subcomplex delta subunit                                                        | COG0712          | C    | -1.52 | 6.8E-06 | -0.79 | 3.3E-03 |
| CLV04_2177 | F-type H+-transporting ATPase subunit c                                                         | COG0636          | C    | -1.33 | 8.5E-06 | -0.62 | 8.1E-03 |
| CLV04_2189 | osmotically-inducible protein OsmY                                                              | COG2823          | S    | -1.96 | 2.7E-09 | -0.45 | 3.8E-03 |
| CLV04_2213 | ATP-binding cassette subfamily B protein/ATP-binding cassette subfamily C protein/ATP-binding c | COG1132          | V    | -1.12 | 6.7E-04 | -1.10 | 1.3E-03 |
| CLV04_2214 | ATP-binding cassette subfamily B protein/ATP-binding cassette subfamily C protein/ATP-binding c | COG1132          | V    | -0.94 | 4.7E-03 | -1.21 | 1.2E-03 |
| CLV04_2248 | hypothetical protein                                                                            |                  | T    | -2.24 | 1.0E-05 | -1.23 | 3.9E-03 |
| CLV04_2313 | putative hydrolase of the HAD superfamily                                                       | COG1011          | S    | -1.48 | 5.8E-06 | -1.04 | 3.4E-04 |
| CLV04_2315 | hypothetical protein                                                                            | COG3646          | K    | -1.40 | 6.1E-06 | -1.16 | 7.9E-05 |
| CLV04_2336 | LPS-assembly lipoprotein                                                                        | COG2980          | M    | -1.45 | 3.1E-07 | -0.95 | 4.3E-05 |
| CLV04_2356 | BirA family biotin operon repressor/biotin-[acetyl-CoA-carboxylase] ligase                      | COG0340, COG1654 | H    | -0.84 | 2.4E-03 | -0.95 | 1.6E-03 |
| CLV04_2357 | rfaE bifunctional protein nucleotidyltransferase chain/domain                                   | COG2870          | M    | -1.39 | 4.9E-05 | -0.89 | 4.0E-03 |
| CLV04_2408 | UDP-N-acetylglucosamine 1-carboxyvinyltransferase                                               | COG0766          | M    | -2.12 | 5.8E-08 | -1.12 | 6.7E-05 |
| CLV04_2422 | putative MFS family arabinose efflux permease                                                   |                  | P    | -1.51 | 2.9E-05 | -1.36 | 1.4E-04 |
| CLV04_2432 | demethylmenaquinone methyltransferase/2-methoxy-6-polyprenyl-1,4-benzoquinol methylase          | COG0500          | H    | -0.99 | 4.6E-03 | -2.47 | 1.9E-06 |
| CLV04_2458 | myo-inositol-1(or 4)-monophosphatase                                                            | COG0483          | G    | -0.66 | 2.8E-03 | -0.64 | 5.9E-03 |
| CLV04_2498 | formiminoglutamase                                                                              | COG0010          | E    | -1.72 | 1.9E-03 | -3.58 | 7.1E-06 |
| CLV04_2499 | imidazolonepropionase                                                                           | COG1228          | E    | -1.86 | 8.5E-04 | -3.37 | 9.0E-06 |
| CLV04_2565 | muramoyltetrapeptide carboxypeptidase LdcA involved in peptidoglycan recycling                  | COG1619          | V    | -0.85 | 1.2E-03 | -0.68 | 9.5E-03 |
| CLV04_2566 | N-acetylglutamate synthase-like GNAT family acetyltransferase                                   |                  | S    | -1.46 | 8.5E-06 | -0.84 | 2.2E-03 |
| CLV04_2579 | hypothetical protein                                                                            | COG3150          | S    | -1.16 | 2.8E-03 | -1.20 | 3.5E-03 |
| CLV04_2580 | hypothetical protein                                                                            |                  |      | -1.20 | 2.0E-04 | -1.01 | 1.4E-03 |
| CLV04_2597 | glutathione S-transferase                                                                       | COG0625          | O    | -2.45 | 5.8E-08 | -1.70 | 4.9E-06 |
| CLV04_2598 | putative O-methyltransferase YrrM                                                               | COG4122          | Q    | -0.89 | 2.1E-03 | -1.16 | 4.4E-04 |
| CLV04_2599 | LysR substrate binding domain-containing protein                                                |                  | K    | -1.06 | 1.2E-03 | -0.95 | 4.1E-03 |
| CLV04_2636 | pyridoxamine 5'-phosphate oxidase                                                               | COG0259          | H    | -1.68 | 3.3E-07 | -0.93 | 2.3E-04 |
| CLV04_2661 | sulfite dehydrogenase (cytochrome) subunit SorA apoprotein                                      | COG2041          | S    | -1.41 | 5.4E-05 | -1.09 | 8.9E-04 |
| CLV04_2664 | 5-(carboxyamino)imidazole ribonucleotide mutase                                                 | COG0041          | F    | -2.01 | 4.0E-06 | -0.98 | 4.9E-03 |
| CLV04_2666 | TPR repeat protein                                                                              |                  |      | -0.94 | 1.5E-03 | -0.87 | 4.4E-03 |
| CLV04_2682 | YggT family protein                                                                             | COG0762          | S    | -1.85 | 1.5E-06 | -0.74 | 8.5E-03 |
| CLV04_2739 | glyoxylase-like metal-dependent hydrolase (beta-lactamase superfamily II)                       | COG0491          | S    | -1.30 | 6.7E-07 | -0.60 | 1.6E-03 |
| CLV04_2756 | glycosyltransferase involved in cell wall biosynthesis                                          | COG0463          | M    | -1.17 | 2.7E-03 | -1.34 | 1.5E-03 |
| CLV04_2757 | glycosyltransferase involved in cell wall biosynthesis                                          |                  | M    | -1.87 | 1.5E-04 | -1.56 | 1.1E-03 |
| CLV04_2758 | transketolase                                                                                   | COG3958          | G    | -1.18 | 7.4E-03 | -1.48 | 2.5E-03 |
| CLV04_2759 | transketolase subunit A                                                                         | COG3959          | G    | -1.49 | 2.0E-03 | -1.58 | 2.0E-03 |
| CLV04_2761 | hypothetical protein                                                                            |                  |      | -1.30 | 6.5E-03 | -1.42 | 6.0E-03 |
| CLV04_2763 | membrane fusion protein                                                                         | COG0845          | U    | -1.46 | 7.8E-05 | -1.40 | 2.0E-04 |
| CLV04_2764 | colicin V processing peptidase                                                                  | COG2274          | V    | -1.16 | 9.3E-05 | -1.21 | 1.2E-04 |
| CLV04_2768 | nucleoside-diphosphate-sugar epimerase                                                          | COG0451          | G, M | -1.41 | 4.0E-06 | -0.75 | 2.4E-03 |
| CLV04_2817 | LSU ribosomal protein L34P                                                                      | COG0230          | J    | -1.44 | 3.1E-03 | -1.51 | 3.5E-03 |
| CLV04_2820 | protein translocase subunit yidC                                                                | COG0706          | U    | -0.68 | 1.4E-03 | -0.74 | 1.2E-03 |
| CLV04_2836 | rare lipoprotein A                                                                              | COG0797          | M    | -1.18 | 4.9E-06 | -1.60 | 5.8E-07 |



|            |                                                                            |         |   |       |         |       |         |
|------------|----------------------------------------------------------------------------|---------|---|-------|---------|-------|---------|
| CLV04_2837 | tRNA (cytidine/uridine-2'-O-)-methyltransferase                            | COG0219 | J | -1.49 | 4.8E-07 | -0.60 | 3.0E-03 |
| CLV04_2864 | rod shape-determining protein MreB                                         | COG1077 | D | -1.01 | 3.9E-05 | -0.63 | 3.3E-03 |
| CLV04_2867 | aspartyl/glutamyl-tRNA(Asn/Gln) amidotransferase subunit B                 | COG0064 | J | -0.80 | 2.0E-04 | -0.58 | 4.0E-03 |
| CLV04_2896 | uncharacterized protein DUF3224                                            |         | S | -1.51 | 7.5E-06 | -0.92 | 1.2E-03 |
| CLV04_2915 | dipeptidyl-peptidase 7                                                     |         | S | -1.28 | 8.3E-05 | -0.97 | 1.5E-03 |
| CLV04_2936 | ectoine hydroxylase-related dioxygenase (phytanoyl-CoA dioxygenase family) | COG5285 | Q | -1.43 | 4.1E-04 | -1.80 | 9.6E-05 |
| CLV04_2941 | protein translocase subunit secA                                           | COG0653 | U | -0.59 | 3.6E-03 | -1.01 | 9.5E-05 |
| CLV04_2945 | glutamate--cysteine ligase                                                 |         | H | -1.14 | 1.8E-04 | -1.66 | 1.2E-05 |
| CLV04_2948 | glutathione synthase                                                       | COG0189 | H | -0.86 | 1.9E-04 | -0.74 | 1.1E-03 |
| CLV04_2949 | diacylglycerol kinase                                                      | COG0818 | M | -1.27 | 3.1E-05 | -0.89 | 1.3E-03 |
| CLV04_2962 | DNA-binding NtrC family response regulator                                 | COG2204 | T | -0.65 | 4.2E-04 | -0.62 | 1.0E-03 |
| CLV04_2983 | exodeoxyribonuclease-3                                                     | COG0708 | L | -0.51 | 4.4E-03 | -0.49 | 8.8E-03 |
| CLV04_2991 | nicotinamidase-related amidase                                             | COG1335 | Q | -1.69 | 1.0E-03 | -1.42 | 5.9E-03 |
| CLV04_2992 | D-3-phosphoglycerate dehydrogenase                                         | COG0111 | E | -1.12 | 1.1E-03 | -1.14 | 1.5E-03 |
| CLV04_3017 | type IV pilus assembly protein PilA                                        | COG4969 | U | -0.64 | 2.4E-03 | -0.82 | 5.9E-04 |
| CLV04_3018 | type IV pilus assembly protein PilA                                        | COG4969 | U | -0.59 | 8.6E-04 | -0.77 | 1.6E-04 |
| CLV04_3030 | translation elongation factor 1A (EF-1A/EF-Tu)                             | COG0050 | J | -1.24 | 1.8E-04 | -0.96 | 2.3E-03 |
| CLV04_3032 | protein translocase subunit secE/sec61 gamma                               | COG0690 | U | -2.26 | 6.8E-08 | -1.31 | 4.1E-05 |
| CLV04_3033 | transcription antitermination protein nusG                                 | COG0250 | K | -1.76 | 3.5E-05 | -1.20 | 1.5E-03 |
| CLV04_3034 | LSU ribosomal protein L11P                                                 | COG0080 | J | -1.78 | 4.5E-07 | -1.35 | 1.5E-05 |
| CLV04_3035 | LSU ribosomal protein L1P                                                  | COG0081 | J | -1.60 | 1.5E-06 | -1.33 | 2.0E-05 |
| CLV04_3037 | LSU ribosomal protein L10P                                                 | COG0244 | J | -2.98 | 6.7E-09 | -1.25 | 6.0E-05 |
| CLV04_3038 | LSU ribosomal protein L12P                                                 | COG0222 | J | -3.14 | 9.8E-08 | -1.14 | 1.7E-03 |
| CLV04_3046 | LSU ribosomal protein L3P                                                  | COG0087 | J | -1.82 | 1.4E-06 | -0.95 | 9.4E-04 |
| CLV04_3047 | LSU ribosomal protein L4P                                                  | COG0088 | J | -2.28 | 4.7E-07 | -1.12 | 6.4E-04 |
| CLV04_3048 | LSU ribosomal protein L23P                                                 | COG0089 | J | -2.82 | 7.0E-06 | -1.33 | 6.2E-03 |
| CLV04_3049 | LSU ribosomal protein L2P                                                  | COG0090 | J | -2.49 | 3.1E-07 | -1.41 | 1.4E-04 |
| CLV04_3050 | SSU ribosomal protein S19P                                                 | COG0185 | J | -2.47 | 5.6E-08 | -1.47 | 1.7E-05 |
| CLV04_3051 | LSU ribosomal protein L22P                                                 | COG0091 | J | -2.46 | 9.9E-08 | -1.42 | 4.1E-05 |
| CLV04_3052 | SSU ribosomal protein S3P                                                  | COG0092 | J | -2.23 | 5.5E-07 | -1.26 | 2.4E-04 |
| CLV04_3053 | LSU ribosomal protein L16P                                                 | COG0197 | J | -2.20 | 1.8E-07 | -1.19 | 1.2E-04 |
| CLV04_3055 | SSU ribosomal protein S17P                                                 | COG0186 | J | -3.10 | 1.3E-07 | -0.96 | 7.2E-03 |
| CLV04_3056 | LSU ribosomal protein L14P                                                 | COG0093 | J | -2.85 | 6.5E-08 | -1.59 | 4.9E-05 |
| CLV04_3057 | LSU ribosomal protein L24P                                                 | COG0198 | J | -3.84 | 1.5E-06 | -2.02 | 1.2E-03 |
| CLV04_3058 | LSU ribosomal protein L5P                                                  | COG0094 | J | -3.22 | 3.4E-07 | -1.95 | 8.4E-05 |
| CLV04_3059 | SSU ribosomal protein S14P                                                 | COG0199 | J | -3.12 | 7.8E-08 | -2.02 | 1.3E-05 |
| CLV04_3060 | SSU ribosomal protein S8P                                                  | COG0096 | J | -3.18 | 3.6E-08 | -2.20 | 2.7E-06 |
| CLV04_3061 | LSU ribosomal protein L6P                                                  | COG0097 | J | -3.28 | 9.9E-08 | -1.89 | 4.1E-05 |
| CLV04_3062 | LSU ribosomal protein L18P                                                 | COG0256 | J | -3.34 | 3.8E-08 | -1.90 | 2.1E-05 |
| CLV04_3063 | SSU ribosomal protein S5P                                                  | COG0098 | J | -3.68 | 5.0E-08 | -1.95 | 4.4E-05 |
| CLV04_3064 | LSU ribosomal protein L30P                                                 | COG1841 | J | -3.28 | 1.9E-07 | -1.79 | 2.3E-04 |
| CLV04_3065 | LSU ribosomal protein L15P                                                 | COG0200 | J | -2.99 | 1.7E-09 | -1.61 | 2.2E-06 |
| CLV04_3066 | protein translocase subunit secY/sec61 alpha                               | COG0201 | U | -3.27 | 9.4E-10 | -1.59 | 2.6E-06 |
| CLV04_3069 | SSU ribosomal protein S13P                                                 | COG0099 | J | -2.49 | 9.9E-08 | -1.10 | 4.1E-04 |
| CLV04_3070 | SSU ribosomal protein S11P                                                 | COG0100 | J | -2.67 | 2.2E-06 | -1.05 | 9.0E-03 |
| CLV04_3071 | SSU ribosomal protein S4P                                                  | COG0522 | J | -2.25 | 1.3E-07 | -1.07 | 2.8E-04 |
| CLV04_3072 | DNA-directed RNA polymerase subunit alpha                                  | COG0202 | K | -3.08 | 7.8E-09 | -1.46 | 2.2E-05 |
| CLV04_3073 | LSU ribosomal protein L17P                                                 | COG0203 | J | -3.02 | 4.3E-10 | -1.67 | 4.6E-07 |
| CLV04_3094 | putative acyl-CoA dehydrogenase                                            | COG1960 | I | -1.56 | 1.2E-03 | -1.30 | 7.3E-03 |
| CLV04_3095 | ornithine cyclodeaminase                                                   | COG2423 | E | -2.56 | 5.8E-06 | -2.16 | 5.6E-05 |
| CLV04_3097 | ParB-like nuclelease family protein                                        | COG1475 | K | -3.34 | 8.8E-07 | -2.08 | 1.9E-04 |

|            |                                                                                     |         |   |       |         |       |         |
|------------|-------------------------------------------------------------------------------------|---------|---|-------|---------|-------|---------|
| CLV04_3098 | adenylyl-sulfate kinase                                                             | COG0529 | P | -2.32 | 1.1E-04 | -1.62 | 3.4E-03 |
| CLV04_3100 | putative NAD(P)/FAD-binding protein YdhS                                            | COG4529 | S | -2.10 | 4.5E-05 | -1.57 | 9.9E-04 |
| CLV04_3101 | amino acid adenylation domain-containing protein                                    |         | Q | -1.55 | 1.2E-04 | -1.29 | 1.0E-03 |
| CLV04_3102 | sulfotransferase family protein                                                     |         |   | -1.64 | 1.1E-05 | -1.23 | 2.9E-04 |
| CLV04_3104 | methyltransferase family protein                                                    |         | S | -1.70 | 1.3E-05 | -1.26 | 3.4E-04 |
| CLV04_3105 | hypothetical protein                                                                |         |   | -1.44 | 1.1E-03 | -1.20 | 6.2E-03 |
| CLV04_3160 | LysR family transcriptional regulator                                               |         | K | -1.80 | 1.4E-07 | -0.53 | 9.2E-03 |
| CLV04_3178 | ATP-binding cassette subfamily B multidrug efflux pump                              | COG1132 | V | -2.01 | 1.2E-04 | -4.94 | 6.5E-08 |
| CLV04_3185 | GDSL-like lipase/acylhydrolase family protein                                       | COG2755 | E | -0.91 | 8.8E-03 | -1.08 | 4.3E-03 |
| CLV04_3195 | hypothetical protein                                                                | COG0012 | J | -1.51 | 2.9E-06 | -0.76 | 2.6E-03 |
| CLV04_3197 | amino acid ABC transporter substrate-binding protein (PAAT family)                  | COG0834 | E | -1.04 | 5.3E-03 | -1.37 | 1.2E-03 |
| CLV04_3266 | type VI secretion system protein ImpK                                               | COG3455 | S | -1.45 | 4.9E-06 | -0.65 | 8.5E-03 |
| CLV04_3270 | type VI secretion system protein ImpL                                               | COG3523 | S | -0.66 | 2.9E-04 | -0.86 | 4.9E-05 |
| CLV04_3271 | type VI secretion system protein ImpM                                               | COG3913 | S | -1.53 | 7.3E-06 | -1.43 | 2.8E-05 |
| CLV04_3272 | type VI secretion system protein ImpB                                               | COG3516 | S | -2.05 | 1.7E-05 | -1.26 | 2.1E-03 |
| CLV04_3273 | type VI secretion system protein ImpC                                               | COG3517 | S | -0.68 | 1.6E-04 | -1.06 | 4.9E-06 |
| CLV04_3274 | type VI secretion system secreted protein Hcp                                       | COG3157 | S | -1.48 | 1.5E-05 | -0.98 | 1.0E-03 |
| CLV04_3276 | type VI secretion system secreted protein VgrG                                      | COG4253 | S | -0.98 | 1.0E-04 | -1.01 | 1.4E-04 |
| CLV04_3280 | type VI secretion system protein ImpH                                               | COG3520 | S | -0.61 | 4.0E-03 | -0.62 | 5.6E-03 |
| CLV04_3281 | hypothetical protein                                                                |         |   | -1.11 | 3.4E-04 | -0.76 | 8.9E-03 |
| CLV04_3283 | hypothetical protein                                                                |         |   | -0.77 | 1.1E-03 | -0.77 | 1.7E-03 |
| CLV04_3285 | type VI secretion system protein ImpA                                               | COG3515 | S | -0.72 | 2.7E-04 | -0.66 | 9.9E-04 |
| CLV04_3349 | uncharacterized protein DUF4124                                                     |         |   | -2.69 | 1.1E-06 | -1.62 | 3.4E-04 |
| CLV04_3351 | uncharacterized protein (DUF2147 family)                                            | COG4731 | S | -1.52 | 3.1E-07 | -0.56 | 4.3E-03 |
| CLV04_3361 | NADH dehydrogenase subunit A                                                        | COG0838 | C | -1.51 | 2.2E-05 | -0.77 | 9.0E-03 |
| CLV04_3363 | NADH dehydrogenase subunit C                                                        | COG0852 | C | -1.08 | 2.3E-05 | -0.64 | 3.1E-03 |
| CLV04_3364 | NADH dehydrogenase subunit D                                                        | COG0649 | C | -0.56 | 4.8E-03 | -0.59 | 5.2E-03 |
| CLV04_3365 | NADH dehydrogenase subunit E                                                        | COG1905 | C | -1.29 | 1.9E-06 | -0.82 | 2.5E-04 |
| CLV04_3366 | NADH dehydrogenase subunit F                                                        | COG1894 | C | -0.81 | 6.9E-04 | -0.90 | 5.5E-04 |
| CLV04_3367 | NADH dehydrogenase subunit G                                                        | COG1034 | C | -0.67 | 2.3E-03 | -0.83 | 7.2E-04 |
| CLV04_3368 | NADH dehydrogenase subunit H                                                        | COG1005 | C | -1.24 | 2.8E-05 | -1.07 | 1.9E-04 |
| CLV04_3369 | NADH dehydrogenase subunit I                                                        | COG1143 | C | -1.60 | 2.5E-06 | -1.10 | 1.7E-04 |
| CLV04_3370 | NADH dehydrogenase subunit J                                                        | COG0839 | C | -1.85 | 3.5E-07 | -1.39 | 1.2E-05 |
| CLV04_3371 | NADH dehydrogenase subunit K                                                        | COG0713 | C | -1.24 | 3.8E-05 | -1.00 | 5.0E-04 |
| CLV04_3372 | NADH dehydrogenase subunit L                                                        | COG1009 | C | -0.85 | 2.8E-04 | -1.05 | 7.8E-05 |
| CLV04_3374 | NADH dehydrogenase subunit N                                                        | COG1007 | C | -0.98 | 1.1E-03 | -1.50 | 5.4E-05 |
| CLV04_3375 | uncharacterized protein DUF2818                                                     |         | S | -0.95 | 3.2E-03 | -1.37 | 2.6E-04 |
| CLV04_3376 | ribonuclease I                                                                      | COG3719 | J | -1.54 | 1.8E-04 | -1.03 | 7.2E-03 |
| CLV04_3394 | Tir chaperone family protein CesT                                                   |         |   | -1.69 | 7.2E-05 | -1.03 | 7.0E-03 |
| CLV04_3406 | biotin carboxylase /acetyl-CoA carboxylase carboxyltransferase subunit alpha        | COG0439 | I | -0.68 | 4.8E-04 | -0.59 | 2.2E-03 |
| CLV04_3407 | biotin carboxyl carrier protein                                                     | COG0511 | I | -1.88 | 1.4E-07 | -0.76 | 1.2E-03 |
| CLV04_3472 | cytochrome c5                                                                       | COG3245 | C | -1.13 | 6.2E-03 | -1.51 | 1.2E-03 |
| CLV04_3473 | FAD-linked oxidoreductase                                                           | COG0277 | C | -1.00 | 9.7E-03 | -1.46 | 1.1E-03 |
| CLV04_3525 | co-chaperone protein HscB                                                           | COG1076 | O | -1.13 | 3.3E-03 | -1.17 | 4.1E-03 |
| CLV04_3527 | FeS assembly scaffold apoprotein IscU /modular FeS cluster scaffolding protein NifU | COG0822 | C | -1.82 | 1.5E-05 | -0.96 | 6.3E-03 |
| CLV04_3529 | BadM/Rrf2 family transcriptional regulator                                          | COG1959 | K | -0.97 | 7.1E-03 | -1.33 | 1.2E-03 |
| CLV04_3540 | thioredoxin                                                                         | COG0526 | O | -2.18 | 7.0E-07 | -1.11 | 1.0E-03 |
| CLV04_3541 | glutathione peroxidase                                                              | COG0386 | O | -1.55 | 9.1E-06 | -1.72 | 6.8E-06 |
| CLV04_3651 | hypothetical protein                                                                | COG3022 | S | -0.96 | 5.1E-05 | -0.68 | 1.9E-03 |
| CLV04_3714 | ProQ/FINO family protein                                                            |         | S | -1.99 | 1.2E-07 | -1.19 | 4.5E-05 |
| CLV04_3717 | nicotinamidase-related amidase                                                      | COG1335 | Q | -1.11 | 9.6E-04 | -1.13 | 1.4E-03 |

|            |                                                                      |                  |   |       |         |       |         |
|------------|----------------------------------------------------------------------|------------------|---|-------|---------|-------|---------|
| CLV04_3722 | organic hydroperoxide reductase OsmC/OhrA                            | COG1764          | O | -1.43 | 9.0E-07 | -0.72 | 1.2E-03 |
| CLV04_3723 | protein disulfide-isomerase                                          | COG0526          | O | -1.49 | 4.5E-07 | -1.25 | 6.6E-06 |
| CLV04_3736 | protein translocase subunit secF                                     | COG0341          | U | -2.11 | 3.8E-07 | -1.12 | 3.3E-04 |
| CLV04_3737 | preprotein translocase subunit SecD                                  | COG0342          | U | -0.83 | 6.7E-04 | -0.86 | 9.2E-04 |
| CLV04_3738 | protein translocase subunit yajC                                     | COG1862          | U | -2.84 | 3.8E-08 | -1.07 | 8.2E-04 |
| CLV04_3741 | Ser-tRNA(Thr) hydrolase /threonyl-tRNA synthetase                    | COG0441          | J | -0.74 | 2.1E-04 | -0.49 | 7.6E-03 |
| CLV04_3743 | LSU ribosomal protein L35P                                           | COG0291          | J | -2.62 | 2.0E-06 | -1.09 | 7.0E-03 |
| CLV04_3744 | LSU ribosomal protein L20P                                           | COG0292          | J | -3.21 | 3.6E-08 | -1.08 | 1.4E-03 |
| CLV04_3745 | phenylalanyl-tRNA synthetase alpha subunit                           | COG0016          | J | -1.25 | 1.1E-05 | -1.25 | 2.1E-05 |
| CLV04_3746 | phenylalanyl-tRNA synthetase beta subunit                            | COG0072, COG0073 | J | -1.15 | 1.2E-06 | -1.33 | 6.9E-07 |
| CLV04_3775 | CRISPR-associated Cas3 family helicase                               | COG1203          | L | -1.65 | 1.5E-06 | -1.08 | 1.9E-04 |
| CLV04_3777 | CRISPR-associated Cse2 family protein                                |                  | L | -2.24 | 5.1E-06 | -1.99 | 3.6E-05 |
| CLV04_3779 | CRISPR-associated Cas5e family protein                               |                  | L | -1.77 | 1.7E-05 | -1.62 | 7.7E-05 |
| CLV04_3780 | CRISPR-associated Cse3 family protein                                |                  | L | -2.34 | 4.5E-07 | -1.71 | 2.8E-05 |
| CLV04_3797 | LytTR family two component transcriptional regulator                 | COG3279          | T | -1.09 | 4.4E-05 | -0.64 | 5.6E-03 |
| CLV04_3798 | hypothetical protein                                                 | COG2972          | T | -1.51 | 1.3E-07 | -1.08 | 8.3E-06 |
| CLV04_3837 | translation initiation factor 2 (bIF-2)                              | COG0532          | J | -1.05 | 5.5E-05 | -0.77 | 1.3E-03 |
| CLV04_3842 | polyribonucleotide nucleotidyltransferase                            | COG1185          | J | -0.54 | 9.0E-03 | -0.75 | 1.5E-03 |
| CLV04_3866 | arginine succinyltransferase                                         | COG3138          | E | -0.69 | 3.1E-03 | -0.87 | 9.8E-04 |
| CLV04_3883 | ATP-dependent helicase HrpA                                          | COG1643          | L | -0.89 | 5.6E-04 | -1.43 | 1.5E-05 |
| CLV04_3890 | signal transduction histidine kinase                                 |                  | T | -1.38 | 9.4E-05 | -1.04 | 1.9E-03 |
| CLV04_3891 | histidine kinase                                                     | COG4585          | T | -0.76 | 5.2E-03 | -0.87 | 3.5E-03 |
| CLV04_3911 | short chain enoyl-CoA hydratase                                      | COG1024          | I | -1.33 | 2.0E-06 | -0.62 | 4.1E-03 |
| CLV04_3936 | adenosylcobyrinic acid synthase (glutamine-hydrolysing)              | COG1492          | H | -0.73 | 2.2E-03 | -0.93 | 5.0E-04 |
| CLV04_3961 | K+-transporting ATPase ATPase B chain                                | COG2216          | P | -1.23 | 1.8E-05 | -0.84 | 9.2E-04 |
| CLV04_3962 | K+-transporting ATPase ATPase A chain                                | COG2060          | P | -0.75 | 2.0E-03 | -0.73 | 3.8E-03 |
| CLV04_3968 | N-acetylglutamate synthase-like GNAT family acetyltransferase        |                  | S | -2.41 | 2.2E-04 | -2.45 | 3.2E-04 |
| CLV04_3979 | methyltransferase family protein                                     |                  | S | -3.25 | 1.8E-09 | -2.13 | 3.6E-07 |
| CLV04_4010 | deoxyadenosine/deoxycytidine kinase                                  | COG1428          | F | -1.82 | 1.1E-06 | -0.72 | 8.4E-03 |
| CLV04_4039 | D-alpha,beta-D-heptose 1,7-bisphosphate phosphatase                  | COG0241          | E | -1.34 | 2.4E-06 | -0.81 | 5.2E-04 |
| CLV04_4066 | hypothetical protein                                                 |                  |   | -1.63 | 2.6E-05 | -0.94 | 4.9E-03 |
| CLV04_4067 | hypothetical protein                                                 |                  |   | -0.97 | 1.0E-03 | -0.93 | 2.2E-03 |
| CLV04_4094 | asparagine synthase (glutamine-hydrolysing)                          | COG0367          | E | -1.58 | 3.3E-05 | -1.64 | 4.3E-05 |
| CLV04_4129 | fucose-binding lectin II (PA-IIL)                                    |                  | S | -2.22 | 7.7E-06 | -2.20 | 1.7E-05 |
| CLV04_4131 | cysteinyl-tRNA synthetase                                            | COG0215          | J | -1.14 | 3.5E-05 | -0.70 | 3.5E-03 |
| CLV04_4132 | LSU ribosomal protein L31P                                           | COG0254          | J | -3.40 | 1.7E-09 | -2.25 | 2.4E-07 |
| CLV04_4154 | pseudolysin/vibriolysin                                              | COG3227          | E | -2.97 | 1.0E-07 | -3.49 | 6.5E-08 |
| CLV04_4157 | RimJ/RimL family protein N-acetyltransferase                         |                  | S | -1.73 | 4.3E-05 | -1.37 | 7.3E-04 |
| CLV04_4182 | chemotaxis protein MotB                                              | COG1360          | N | -0.46 | 7.0E-03 | -0.75 | 3.4E-04 |
| CLV04_4186 | ribosomal large subunit pseudouridine synthase C                     | COG0564          | J | -0.76 | 4.2E-03 | -0.85 | 2.9E-03 |
| CLV04_4190 | hypothetical protein                                                 | COG1099          | S | -0.84 | 1.5E-03 | -1.79 | 2.0E-06 |
| CLV04_4195 | ferritin-like protein                                                |                  |   | -1.18 | 5.5E-05 | -1.94 | 7.2E-07 |
| CLV04_4196 | hypothetical protein                                                 |                  |   | -0.86 | 2.9E-03 | -1.94 | 3.6E-06 |
| CLV04_4208 | ribosomal protein S18 acetylase RimI-like enzyme                     |                  | S | -1.24 | 1.9E-04 | -1.20 | 4.4E-04 |
| CLV04_4242 | single-strand binding protein                                        | COG0629          | L | -2.71 | 3.2E-09 | -0.75 | 1.1E-03 |
| CLV04_4246 | catechol 2,3-dioxygenase-like lactoylglutathione lyase family enzyme |                  |   | -2.16 | 2.9E-08 | -0.61 | 6.0E-03 |
| CLV04_4324 | RND family efflux transporter MFP subunit                            |                  | S | -1.24 | 3.3E-06 | -0.80 | 4.1E-04 |
| CLV04_4325 | HAE1 family hydrophobic/amphiphilic exporter-1                       | COG0841          | V | -0.40 | 8.9E-03 | -0.65 | 5.2E-04 |
| CLV04_4365 | uncharacterized Zn-binding protein involved in type VI secretion     | COG4104          | S | -4.30 | 4.4E-07 | -3.04 | 4.0E-05 |
| CLV04_4366 | hypothetical protein                                                 |                  |   | -4.23 | 3.5E-09 | -2.58 | 1.9E-06 |
| CLV04_4388 | hypothetical protein                                                 |                  |   | -2.94 | 1.2E-06 | -2.19 | 4.1E-05 |

|                                                                            |                                                                                              |         |      |       |         |       |         |
|----------------------------------------------------------------------------|----------------------------------------------------------------------------------------------|---------|------|-------|---------|-------|---------|
| CLV04_4422                                                                 | threonine dehydrogenase-like Zn-dependent dehydrogenase                                      | COG1063 | C    | -1.50 | 7.5E-06 | -1.83 | 2.1E-06 |
| CLV04_4435                                                                 | signal peptidase I                                                                           | COG0681 | U    | -1.66 | 7.3E-07 | -0.87 | 6.4E-04 |
| CLV04_4452                                                                 | ribosome biogenesis GTPase                                                                   | COG1162 | S    | -5.41 | 8.4E-11 | -5.67 | 4.9E-10 |
| CLV04_4453                                                                 | uncharacterized membrane protein YoaT (DUF817 family)                                        | COG3739 | S    | -3.65 | 1.2E-10 | -3.64 | 8.1E-10 |
| CLV04_4473                                                                 | histidyl-tRNA synthetase                                                                     | COG0124 | J    | -3.50 | 1.8E-09 | -1.05 | 9.2E-04 |
| <b>Genes upregulated by translation inhibition modulated by air system</b> |                                                                                              |         |      |       |         |       |         |
| CLV04_0472                                                                 | dipeptidase D                                                                                | COG2195 | E    | -0.57 | 1.8E-03 | -0.52 | 5.8E-03 |
| CLV04_0474                                                                 | putative Zn-dependent protease                                                               | COG0312 | S    | -1.12 | 3.6E-04 | -0.89 | 3.4E-03 |
| CLV04_0655                                                                 | non-ribosomal peptide synthase protein (TIGR01720 family)/amino acid adenylation domain-cont | COG1020 | Q    | -4.27 | 8.6E-08 | -5.03 | 5.9E-08 |
| CLV04_0656                                                                 | polyketide-type polyunsaturated fatty acid synthase PfaA                                     | COG3321 | Q    | -3.70 | 1.3E-06 | -4.36 | 6.5E-07 |
| CLV04_0657                                                                 | PfaB family protein                                                                          | COG0764 | Q    | -3.10 | 3.7E-06 | -4.06 | 6.5E-07 |
| CLV04_0658                                                                 | PfaD family protein                                                                          | COG2070 | S    | -2.87 | 1.3E-05 | -3.87 | 1.5E-06 |
| CLV04_0659                                                                 | medium-chain acyl-[acyl-carrier-protein] hydrolase                                           | COG3208 | Q    | -3.38 | 6.3E-06 | -3.36 | 1.4E-05 |
| CLV04_0660                                                                 | 4'-phosphopantetheinyl transferase                                                           | COG2091 | H    | -2.64 | 1.3E-04 | -3.10 | 5.6E-05 |
| CLV04_0661                                                                 | polysaccharide pyruvyl transferase WcaK-like protein                                         |         |      | -1.64 | 1.0E-04 | -2.15 | 1.6E-05 |
| CLV04_1214                                                                 | hypothetical protein                                                                         |         |      | -1.07 | 9.6E-04 | -1.00 | 2.6E-03 |
| CLV04_1215                                                                 | violacein biosynthesis enzyme VioE                                                           |         |      | -3.07 | 5.0E-07 | -3.68 | 2.2E-07 |
| CLV04_1216                                                                 | anthraniloyl-CoA monooxygenase                                                               | COG0654 | C, H | -3.79 | 7.9E-09 | -3.84 | 4.5E-08 |
| CLV04_1217                                                                 | kynurenine 3-monooxygenase                                                                   | COG0654 | H    | -4.28 | 7.1E-08 | -4.29 | 1.8E-07 |
| CLV04_1218                                                                 | iminophenyl-pyruvate dimer synthase VioB                                                     |         |      | -4.14 | 3.1E-07 | -4.01 | 9.1E-07 |
| CLV04_1219                                                                 | monoamine oxidase                                                                            |         | S    | -6.10 | 3.6E-10 | -4.85 | 4.5E-08 |
| CLV04_2088                                                                 | hypothetical protein                                                                         |         |      | -0.93 | 5.0E-03 | -1.08 | 2.9E-03 |
| CLV04_2204                                                                 | adenosine deaminase                                                                          |         | F    | -0.92 | 2.1E-04 | -1.22 | 2.9E-05 |
| CLV04_2269                                                                 | hypothetical protein                                                                         | COG1896 | S    | -2.75 | 1.6E-07 | -2.26 | 2.6E-06 |
| CLV04_2291                                                                 | phosphoribosylamine--glycine ligase                                                          | COG0151 | F    | -0.73 | 3.1E-03 | -0.68 | 8.2E-03 |
| CLV04_2493                                                                 | hypothetical protein                                                                         |         |      | -1.80 | 5.4E-06 | -1.76 | 1.4E-05 |
| CLV04_2537                                                                 | carbohydrate ABC transporter substrate-binding protein (CUT1 family)                         |         | G    | -0.96 | 9.0E-03 | -1.58 | 3.5E-04 |
| CLV04_2637                                                                 | pseudolysin                                                                                  | COG3227 | E    | -1.51 | 1.6E-03 | -2.90 | 9.0E-06 |
| CLV04_2753                                                                 | hypothetical protein                                                                         |         |      | -1.68 | 1.1E-05 | -0.96 | 2.2E-03 |
| CLV04_2839                                                                 | biotin synthase                                                                              | COG0502 | H    | -2.87 | 4.9E-09 | -2.08 | 3.4E-07 |
| CLV04_2850                                                                 | aromatic amino acid:proton symporter (AAT family)                                            | COG1113 | E    | -0.97 | 3.9E-04 | -0.84 | 2.1E-03 |
| CLV04_3096                                                                 | cysteine synthase A                                                                          | COG0031 | E    | -2.74 | 1.5E-06 | -2.19 | 2.7E-05 |
| CLV04_3159                                                                 | cviR                                                                                         | COG2771 | K    | -0.62 | 1.2E-03 | -0.81 | 2.4E-04 |
| CLV04_3520                                                                 | fatty acid desaturase                                                                        | COG3239 | I    | -0.77 | 2.5E-03 | -1.96 | 7.0E-07 |
| CLV04_3521                                                                 | diaminopimelate decarboxylase                                                                | COG0019 | E    | -0.94 | 9.5E-04 | -1.71 | 9.1E-06 |
| CLV04_3776                                                                 | CRISPR-associated Cse1 family protein                                                        |         | L    | -1.99 | 4.5E-07 | -1.78 | 3.3E-06 |
| CLV04_3778                                                                 | CRISPR-associated Cse4 family protein                                                        |         | L    | -1.56 | 5.7E-06 | -1.54 | 1.4E-05 |
| CLV04_4098                                                                 | phenazine biosynthesis protein phzE                                                          | COG0512 | E, H | -2.48 | 2.4E-06 | -1.22 | 2.3E-03 |

**Table supplement 2.** Differential gene expression values of the genes identified in the genetic screen.

| Gene ID            | Predicted Function                                  | WT                             |                                | WT                             |                               | <i>airR</i>                    |                                | <i>airR</i>                    |                               |
|--------------------|-----------------------------------------------------|--------------------------------|--------------------------------|--------------------------------|-------------------------------|--------------------------------|--------------------------------|--------------------------------|-------------------------------|
|                    |                                                     | No Antibiotic VS Spectinomycin | No Antibiotic VS Spectinomycin | No Antibiotic VS Tetracycline  | No Antibiotic VS Tetracycline | No Antibiotic VS Spectinomycin | No Antibiotic VS Spectinomycin | No Antibiotic VS Tetracycline  | No Antibiotic VS Tetracycline |
|                    |                                                     | Log <sub>2</sub> (Fold change) | P Value                        | Log <sub>2</sub> (Fold change) | P Value                       | Log <sub>2</sub> (Fold change) | P Value                        | Log <sub>2</sub> (Fold change) | P Value                       |
| Conserved response |                                                     |                                |                                |                                |                               |                                |                                |                                |                               |
| CLV04_2302         | Oxidoreductase molybdopterin binding domain protein | -0.57                          | 5.3E-02                        | -0.32                          | 3.3E-01                       | -0.75                          | 1.8E-02                        | -0.64                          | 5.9E-02                       |
| CLV04_2301         | Sensor histidine kinase                             | -0.14                          | 5.0E-01                        | -0.01                          | 9.8E-01                       | -0.29                          | 1.7E-01                        | -0.27                          | 2.6E-01                       |
| CLV04_3834         | Long chain fatty-acid CoA ligase                    | 0.02                           | 8.9E-01                        | <b>-0.47</b>                   | <b>2.9E-03</b>                | 0.23                           | 7.6E-02                        | <b>-0.41</b>                   | <b>7.9E-03</b>                |
| CLV04_1656         | Phosphoenolpyruvate synthase                        | 0.48                           | 2.5E-02                        | -0.05                          | 8.6E-01                       | 0.34                           | 1.0E-01                        | -0.03                          | 9.0E-01                       |
| Variable response  |                                                     |                                |                                |                                |                               |                                |                                |                                |                               |
| CLV04_2730         | SAM-dependent methyltransferase                     | 0.22                           | 1.9E-01                        | 0.17                           | 3.9E-01                       | <b>-0.47</b>                   | <b>9.3E-03</b>                 | -0.17                          | 3.6E-01                       |
| CLV04_2412         | Transcriptional repressor <i>cdeR</i>               | 0.55                           | 1.5E-02                        | -0.04                          | 8.9E-01                       | <b>-0.56</b>                   | <b>1.1E-02</b>                 | 0.25                           | 2.9E-01                       |
| CLV04_1292         | Phosphoglyceromutase                                | <b>0.41</b>                    | <b>8.5E-03</b>                 | 0.08                           | 6.2E-01                       | 0.14                           | 3.3E-01                        | 0.02                           | 8.9E-01                       |
| CLV04_2695         | Phosphoglycerate kinase                             | -0.30                          | 2.2E-01                        | 0.35                           | 1.9E-01                       | -0.13                          | 6.1E-01                        | 0.25                           | 3.5E-01                       |
| CLV04_1869         | MarR family transcriptional regulator               | <b>-2.90</b>                   | <b>8.6E-05</b>                 | <b>-3.21</b>                   | <b>6.3E-05</b>                | <b>-2.95</b>                   | <b>6.3E-05</b>                 | <b>-2.51</b>                   | <b>6.2E-04</b>                |
| CLV04_3464         | GntR family transcriptional regulator               | 0.47                           | 2.71E-02                       | 0.44                           | 5.4E-02                       | -0.19                          | 3.2E-01                        | 0.07                           | 7.6E-01                       |
| CLV04_3178         | Multidrug ABC transporter ATP-binding protein       | <b>-2.01</b>                   | <b>1.2E-04</b>                 | <b>-4.94</b>                   | <b>6.5E-08</b>                | <b>-3.10</b>                   | <b>1.6E-06</b>                 | <b>-4.75</b>                   | <b>1.7E-07</b>                |
| CLV04_1011         | Enoyl-CoA hydratase                                 | <b>2.93</b>                    | <b>8.6E-08</b>                 | <b>2.53</b>                    | <b>6.5E-07</b>                | <b>2.86</b>                    | <b>7.1E-08</b>                 | <b>2.21</b>                    | <b>2.3E-06</b>                |

**Table supplement 3.** Genes differentially expressed between *C. violaceum* ATCC31532 WT and airR mutant in the absence of antibiotics.

| Gene ID    | Predicted Function                                                                        | COGs ID          | COG Category | No Antibiotic<br>WT VS <i>airR</i> |         |
|------------|-------------------------------------------------------------------------------------------|------------------|--------------|------------------------------------|---------|
|            |                                                                                           |                  |              | Log <sub>2</sub> (Fold change)     | P Value |
| CLV04_0653 | amino acid adenylation domain-containing protein                                          | COG3321          | Q            | 1.84                               | 1.1E-02 |
| CLV04_0654 | amino acid adenylation domain-containing protein                                          | COG0318, COG1020 | Q            | 2.21                               | 1.0E-02 |
| CLV04_0655 | non-ribosomal peptide synthase protein (TIGR01720 family)/amino acid adenylation domain-c | COG1020          | Q            | 2.33                               | 4.0E-03 |
| CLV04_0656 | polyketide-type polyunsaturated fatty acid synthase PfaA                                  | COG3321          | Q            | 2.68                               | 3.9E-03 |
| CLV04_0657 | PfaB family protein                                                                       | COG0764          | Q            | 2.88                               | 1.8E-03 |
| CLV04_0658 | PfaD family protein                                                                       | COG2070          | S            | 2.83                               | 5.1E-03 |
| CLV04_0661 | polysaccharide pyruvyl transferase WcaK-like protein                                      |                  |              | 2.08                               | 1.8E-03 |
| CLV04_2297 | nicotinamidase-related amidase                                                            | COG1335          | Q            | -1.38                              | 9.8E-03 |
| CLV04_2298 | MarR family transcriptional regulator                                                     | COG1846          | K            | -1.45                              | 1.2E-03 |
| CLV04_2785 | TetR family transcriptional regulator                                                     |                  | K            | 1.23                               | 4.3E-03 |
| CLV04_4095 | cytochrome c                                                                              |                  | S            | 2.20                               | 9.8E-03 |
| CLV04_4096 | p-hydroxybenzoate 3-monooxygenase                                                         | COG0654          | Q            | 2.79                               | 1.2E-03 |
| CLV04_4097 | GMP synthase (glutamine-hydrolysing)                                                      | COG0518          | F            | 2.36                               | 2.2E-03 |
| CLV04_4099 | glutathione S-transferase                                                                 | COG0625          | O            | 1.28                               | 4.8E-02 |
| CLV04_4100 | glutamate racemase                                                                        | COG0796          | M            | 1.23                               | 2.6E-02 |

**Table supplement 4.** Primers used in this study.

| Name            | Sequence                                          |
|-----------------|---------------------------------------------------|
| KanTopo_MluIFor | CACCACGCGTACAGCAAGCGAACCGGAATTG                   |
| KanTopo_MluIRev | ACACGCGTCTCATGAGCGGATACATATTTGAATG                |
| GenPATseq1      | CTTGGATGCCCGAGGCATAG                              |
| GenPATseq2      | CTGTACAAAAAACAGTCATAACAAGCCATG                    |
| AR1A            | GGCCACGCGTCGACTAGTACNNNNNNNNNNNGTAAT              |
| AR1B            | GGCCACGCGTCGACTAGTACNNNNNNNNNNNGATGC              |
| AR2             | GGCCACGCGTCGACTAGTAC                              |
| MuCv0535/6_Afor | CACCACATGTGCTGCCGCTTACC GTTGAC                    |
| MuCv0535/6_Arev | CGCGAATTGGCTTGAAACCGATCAGCATGCCATTTTCGCCTCCCGCCGA |
| MuCv0535/6_Bfor | TCGGCGGGAGGCGAAATGGCATGCTGATCGGTTTCAAGCCAATTCGCG  |
| MuCv0535/6_Brev | TAACATGTCGGCAACCAAGCCATGTCATG                     |
| pACYC184Cm_For  | TAGCATGCGTTTTTATCAGGCTCTGGGAGGC                   |
| pACYC184Cm_Rev  | CACCGCATGCGATAGAAACAGAAGCCACTGGAGC                |
| pJN105Mob_For   | TAGGCGCGCCTGTGGTCAAGCTCGTGGGC                     |
| pJN105Mob_Rev   | CACCGCGCGCCCAATTCGTTCAAGCCGAGATCGGC               |
| CV1055_For      | CACCTCTAGAAGGAGGGTTTTGCCATGCCTTG                  |
| CV1055_Rev      | CGAGCTCTTAGAGCACGCGGGTAAGCAG                      |
| CviI_For        | CACCTCTAGAAGGAGGCTTGAGTGAAAAAGTTCTAC              |
| CviI_Rev        | CGAGCTCTCAATGCGAATAATCGTACTCACGCC                 |
| CviR_For        | CACCTCTAGACAAGGAAGACTCGCTCATGGTGATCTC             |
| CviR_Rev        | CGAGCTCTCATTTCGTTTCGCTACGGTCGAGG                  |
| CV0536_For      | CACCTCTAGACATCGTGGTGCGTTGATGAGAATTCC              |
| CV0536_Rev      | CCGAGCTCTCAGACCAGCTCAACCGGC                       |
| CV0535/6_For    | CACCTCTAGAGAATCGGCGGGAGGCGAAATGA                  |
| CviR_For        | CACCTCTAGACAAGGAAGACTCGCTCATGGTGATCTC             |
| CviR_Rev        | CGAGCTCTCATTTCGTTTCGCTACGGTCGAGG                  |
| RTCvvioSFor     | GCCTTGCATCACCCGCAG                                |
| RTCvvioSRev     | TGATCCTGGCCGGCCAATTG                              |
| RTCvceiRFor     | CATGGCCGGTCACATCGAGAC                             |
| RTCvceiRRev     | CAGTCGCTGGGGTAGCTGAC                              |
| RTdnaGFor       | TCGCTGGAGCAACTGATGCAAATG                          |
| RTdnaGRev       | TGGTAGTTGGCGGTGATCGC                              |

**Table supplement 5.** *Chromobacterium* spp. genomes used for phylogenetic reconstruction.

| Name                                            | Strain Name | GenBank Assembly accession |
|-------------------------------------------------|-------------|----------------------------|
| <i>Chromobacterium vaccinii</i> 21-1            | 211         | CP017707.1                 |
| <i>Chromobacterium violaceum</i> 16-454         | 16454       | MUKS00000000.1             |
| <i>Chromobacterium violaceum</i> 16-419A        | 16419A      | MUKQ00000000.1             |
| <i>Chromobacterium violaceum</i> 16-419B        | 16419B      | MUKR00000000.1             |
| <i>Chromobacterium violaceum</i> ATCC12472      | ATCC12472   | AE016825.1                 |
| <i>Chromobacterium violaceum</i> ATCC31532      | ATCC31532   | PKBZ00000000.1             |
| <i>Chromobacterium</i> sp. ATCC 53434           | ATCC53434   | CP025429.1                 |
| <i>Chromobacterium</i> sp. C-61                 | C61         | CAEE00000000.1             |
| <i>Chromobacterium aquaticum</i> CC-SEYA-1      | CCSEYA1     | MQZY00000000.1             |
| <i>Chromobacterium violaceum</i> strain CV1192  | CV1192      | CP024028.1                 |
| <i>Chromobacterium violaceum</i> strain CV1197  | CV1197      | CP024029.1                 |
| <i>Chromobacterium haemolyticum</i> DSM 19808   | DSM19808    | JONK00000000.1             |
| <i>Chromobacterium amazonense</i> DSM26508      | DSM26508    | MKCR00000000.1             |
| <i>Chromobacterium subsugae</i> F49             | F49         | JWJN00000000.1             |
| <i>Chromobacterium</i> sp. F49                  | F492        | LQNP00000000.1             |
| <i>Chromobacterium violaceum</i> GHPS1          | GHPS1       | NHOO00000000.1             |
| <i>Chromobacterium violaceum</i> GN5            | GN5         | JWPW00000000.1             |
| <i>Chromobacterium haemolyticum</i> H3973       | H3973       | MUKT00000000.1             |
| <i>Chromobacterium haemolyticum</i> H4137       | H4137       | MUKU00000000.1             |
| <i>Chromobacterium haemolyticum</i> H5244       | H5244       | MUKV00000000.1             |
| <i>Chromobacterium violaceum</i> H5524          | H5524       | MUKW00000000.1             |
| <i>Chromobacterium violaceum</i> H5525          | H5525       | MUKX00000000.1             |
| <i>Chromobacterium sphagni</i> IIBBL 14B-1      | IIBBL14B1   | MKCT00000000.1             |
| <i>Chromobacterium sphagni</i> IIBBL 37-2       | IIBBL372    | MKCS00000000.1             |
| <i>Chromobacterium violaceum</i> L 1B5 1        | L1B51       | JYGI00000000.1             |
| <i>Chromobacterium</i> sp. LK1                  | LK1         | LDUI00000000.1             |
| <i>Chromobacterium</i> sp. LK11                 | LK11        | LDUR00000000.1             |
| <i>Chromobacterium violaceum</i> LK15           | LK15        | LDUT00000000.1             |
| <i>Chromobacterium violaceum</i> LK17           | LK17        | LDUU00000000.1             |
| <i>Chromobacterium violaceum</i> LK30           | LK30        | LDUX00000000.1             |
| <i>Chromobacterium violaceum</i> LK6            | LK6         | LDUM00000000.1             |
| <i>Chromobacterium pseudoviolaceum</i> LMG 3953 | LMG3953     | MQZX00000000.1             |
| <i>Chromobacterium subsugae</i> MWU12-2387      | MWU122387   | MQZZ00000000.1             |
| <i>Chromobacterium</i> sp. MWU13-2610           | MWU132610   | PPTF00000000.1             |
| <i>Chromobacterium</i> sp. MWU14-2602           | MWU142602   | PQWB00000000.1             |
| <i>Chromobacterium vaccinii</i> MWU205          | MWU205      | JZJL00000000.1             |
| <i>Chromobacterium subsugae</i> MWU2387         | MWU2387     | LCWR00000000.1             |
| <i>Chromobacterium subsugae</i> MWU2576         | MWU2576     | LCWQ00000000.1             |
| <i>Chromobacterium subsugae</i> MWU2920         | MWU2920     | LCWP00000000.1             |
| <i>Chromobacterium vaccinii</i> MWU328          | MWU328      | JZJJ00000000.1             |
| <i>Chromobacterium subsugae</i> MWU3535         | MWU3525     | LCWO00000000.1             |
| <i>Chromobacterium piscinae</i> ND17            | ND17        | JTGE00000000.1             |
| <i>Chromobacterium subsugae</i> PRAA4-1         | PRAA41      | JYKA00000000.1             |
| <i>Chromobacterium haemolyticum</i> T124        | T124        | JRFR00000000.1             |





|            |                                                   |         |      |       |         |       |         |       |                |       |                |      |                |      |                |
|------------|---------------------------------------------------|---------|------|-------|---------|-------|---------|-------|----------------|-------|----------------|------|----------------|------|----------------|
| CLV04_2850 | aromatic amino acid:proton symporter (AAT family) | COG1113 | E    | -0.97 | 3.9E-04 | -0.84 | 2.1E-03 | 0.14  | <u>5.6E-01</u> | -0.39 | <u>1.2E-01</u> | 0.46 | 2.5E-01        | 1.12 | 4.1E-04        |
| CLV04_3096 | cysteine synthase A                               | COG0031 | E    | -2.74 | 1.5E-06 | -2.19 | 2.7E-05 | -1.73 | 1.5E-04        | -1.49 | 1.2E-03        | 1.17 | 1.1E-02        | 1.49 | <u>8.4E-04</u> |
| CLV04_3159 | cvrR                                              | COG2771 | K    | -0.62 | 1.2E-03 | -0.81 | 2.4E-04 | -0.22 | <u>1.7E-01</u> | -0.37 | <u>3.9E-02</u> | 0.36 | 2.1E-01        | 0.32 | 5.6E-02        |
| CLV04_3520 | fatty acid desaturase                             | COG3239 | I    | -0.77 | 2.5E-03 | -1.96 | 7.0E-07 | 0.19  | 4.4E-01        | -1.20 | 1.8E-04        | 1.18 | <u>5.9E-04</u> | 1.37 | <u>1.2E-04</u> |
| CLV04_3521 | diaminopimelate decarboxylase                     | COG0019 | E    | -0.94 | 9.5E-04 | -1.71 | 9.1E-06 | 0.74  | 7.9E-03        | -1.31 | 1.5E-04        | 1.02 | <u>5.5E-03</u> | 2.30 | <u>1.4E-06</u> |
| CLV04_3776 | CRISPR-associated Cse1 family protein             |         | L    | -1.99 | 4.5E-07 | -1.78 | 3.3E-06 | -1.17 | 1.2E-04        | -1.33 | 1.1E-04        | 0.81 | <u>1.0E-02</u> | 1.19 | <u>1.8E-04</u> |
| CLV04_3778 | CRISPR-associated Cse4 family protein             |         | L    | -1.56 | 5.7E-06 | -1.54 | 1.4E-05 | -0.33 | 1.6E-01        | -0.80 | 4.6E-03        | 0.92 | <u>6.1E-03</u> | 1.41 | <u>7.1E-05</u> |
| CLV04_4098 | phenazine biosynthesis protein phzE               | COG0512 | E, H | -2.48 | 2.4E-06 | -1.22 | 2.3E-03 | -0.42 | 2.4E-01        | -0.75 | 5.8E-02        | 1.55 | <u>3.5E-03</u> | 3.14 | <u>1.1E-06</u> |
